# Supplementary material
Source: PubMed Central journal article supplement (PMC6649282)
Supplement: ao9b00047_si_001.pdf [file ao9b00047_si_001.pdf]

## Supporting Information

## Self-assembly of Diphenylalanine-Peptide Nucleic Acid-conjugates

Dhrubajyoti Datta<sup>at\*</sup>, Omshanker Tiwari<sup>at†</sup> and Manoj Kumar Gupta<sup>a</sup><sup>a</sup>Department of Chemistry, Chemical Biology Unit, Indian Institute of Science Education and Research Pune, Dr. Homi Bhabha Road, Pune 411008, India

\*Corresponding author

†Equal Contribution

## Table of Contents

| Contents                                                         | Page No | Contents                                                             | Page No |
|------------------------------------------------------------------|---------|----------------------------------------------------------------------|---------|
| Synthesis in solution phase                                      | S-2     | <sup>1</sup> H-/ <sup>13</sup> C -NMR of <b>8c</b>                   | S-44    |
| <sup>1</sup> H-/ <sup>13</sup> C -NMR of <b>1S</b>               | S-8     | <sup>1</sup> H-/ <sup>13</sup> C -NMR and FTIR of <b>8d</b>          | S-45    |
| <sup>1</sup> H-/ <sup>13</sup> C -NMR of <b>2S</b>               | S-9     | <sup>1</sup> H-/ <sup>13</sup> C -NMR and FTIR of <b>9</b>           | S-47    |
| <sup>1</sup> H-/ <sup>13</sup> C -NMR of <b>3S</b>               | S-10    | <sup>1</sup> H-/ <sup>13</sup> C -NMR of Boc-Phe-Phe-OH used in SPPS | S-49    |
| <sup>1</sup> H-/ <sup>13</sup> C -NMR of <b>4S</b>               | S-11    | Synthesis of nucleopeptides through SPPS                             | S-50    |
| <sup>1</sup> H-/ <sup>13</sup> C -NMR of <b>5S</b>               | S-12    | HPLC trace, MALDI and UV spectrum of <b>NP1-NP4</b>                  | S-51    |
| <sup>1</sup> H-/ <sup>13</sup> C -NMR of <b>6S</b>               | S-13    | MALDI-Tof and ESI-MS of <b>NP1:NP4</b> duplex                        | S-55    |
| <sup>1</sup> H-/ <sup>13</sup> C -NMR of <b>7S</b>               | S-14    | MALDI-Tof and ESI-MS of <b>NP2:NP3</b> duplex                        | S-57    |
| <sup>1</sup> H-/ <sup>13</sup> C -NMR of <b>8S</b>               | S-15    | PXRD data                                                            | S-59    |
| HRMS of <b>2a</b> and <b>2b</b>                                  | S-16    | FTIR data                                                            | S-60    |
| <sup>1</sup> H-/ <sup>13</sup> C -NMR of <b>2c</b>               | S-17    | Contact angle measurements                                           | S-61    |
| HRMS of <b>2c</b> and <b>2d</b>                                  | S-18    | SEM images                                                           | S-62    |
| <sup>1</sup> H-/ <sup>13</sup> C -NMR of <b>3a</b>               | S-19    | EDAX from SEM data for representative peptides                       | S-63    |
| <sup>1</sup> H-/ <sup>13</sup> C -NMR of <b>3b</b>               | S-20    | AFM images                                                           | S-64    |
| <sup>1</sup> H-/ <sup>13</sup> C -NMR of <b>3c</b>               | S-21    | Height profile from AFM images                                       | S-65    |
| <sup>1</sup> H-/ <sup>13</sup> C -NMR of <b>3d</b>               | S-22    | HRTEM images                                                         | S-66    |
| <sup>1</sup> H-/ <sup>13</sup> C -NMR and FTIR of <b>9S</b>      | S-23    | DLS data                                                             | S-67    |
| <sup>1</sup> H-/ <sup>13</sup> C -NMR of <b>4</b>                | S-25    | Stability of nucleopeptide <b>6a</b> under external stimuli          | S-68    |
| <sup>1</sup> H-/ <sup>13</sup> C -NMR of Nucleobase acetic acids | S-26    | Effect of counter anions for <b>7c</b> and <b>7d</b>                 | S-69    |
| <sup>1</sup> H-/ <sup>13</sup> C -NMR and FTIR of <b>5a</b>      | S-30    | TGA data for representative peptides                                 | S-70    |
| <sup>1</sup> H-/ <sup>13</sup> C -NMR and FTIR of <b>5b</b>      | S-32    | Stability of nucleopeptides under proteolytic conditions             | S-71    |
| <sup>1</sup> H-/ <sup>13</sup> C -NMR and FTIR of <b>5c</b>      | S-34    | Solvent dependent morphology of <b>3c</b> , <b>6a</b> and <b>7d</b>  | S-74    |
| <sup>1</sup> H-/ <sup>13</sup> C -NMR and FTIR of <b>5d</b>      | S-36    | Time dependent morphology of <b>6a</b> and <b>6b</b>                 | S-76    |
| <sup>1</sup> H-/ <sup>13</sup> C -NMR of <b>6a</b>               | S-38    | Results of Turbidity Assay                                           | S-77    |
| <sup>1</sup> H-/ <sup>13</sup> C -NMR of <b>6b</b>               | S-39    | Confocal images of CF encapsulated peptides                          | S-78    |
| <sup>1</sup> H-/ <sup>13</sup> C -NMR of <b>6c</b>               | S-40    | CF release study by dicationic dipeptide                             | S-78    |
| <sup>1</sup> H-/ <sup>13</sup> C -NMR of <b>6d</b>               | S-41    | Encapsulation and release of Dox from nucleopeptide                  | S-79    |
| <sup>1</sup> H-/ <sup>13</sup> C -NMR of <b>7c</b>               | S-42    | Cyclic voltammetry                                                   | S-80    |
| <sup>1</sup> H-/ <sup>13</sup> C -NMR of <b>7d</b>               | S-43    | References                                                           | S-86    |

CF= Carboxyfluorescein; **Dox** = Doxorubicin; **SPPS** = Solid Phase Peptide Synthesis

## Synthesis of PNA monomer for amide / click conjugation with Phe-Phe moiety in solution phase:

Boc protected aminoethylglycyl (*aeg*) backbones **1S** and **2S** were synthesized first following known literature procedure<sup>1</sup>. Compound **2S** was treated with nucleobase adenine (A), 2-amino-6-chloropurine (6-Cl-G), and thymine (T) under heating condition in presence of K<sub>2</sub>CO<sub>3</sub> to afford intermediates **3S**, **4S** and **5S** in good yields. Again, **1S** was coupled with *N*<sup>2</sup>-(Isobutyryl)-9-(carboxymethyl)guanine to afford compound **6S** in moderate yield. The spectroscopic data matched perfectly with the literature values<sup>1</sup>. The exocyclic amino groups at *N*<sup>6</sup> and *N*<sup>2</sup> positions of **3S** and **4S** were protected by Cbz and isobutyl groups to obtain **7S** and **8S** respectively in good yields. Finally, the Boc groups were removed from **5S**, **6S**, **7S** and **8S** in presence of 5% TFA in DCM to obtain **2a-d** (Scheme S1). After removal of volatile materials from the respective reaction mixtures and without further purification these PNA backbones were subjected for amide coupling with Boc-Phe-Phe-OH (**1**).

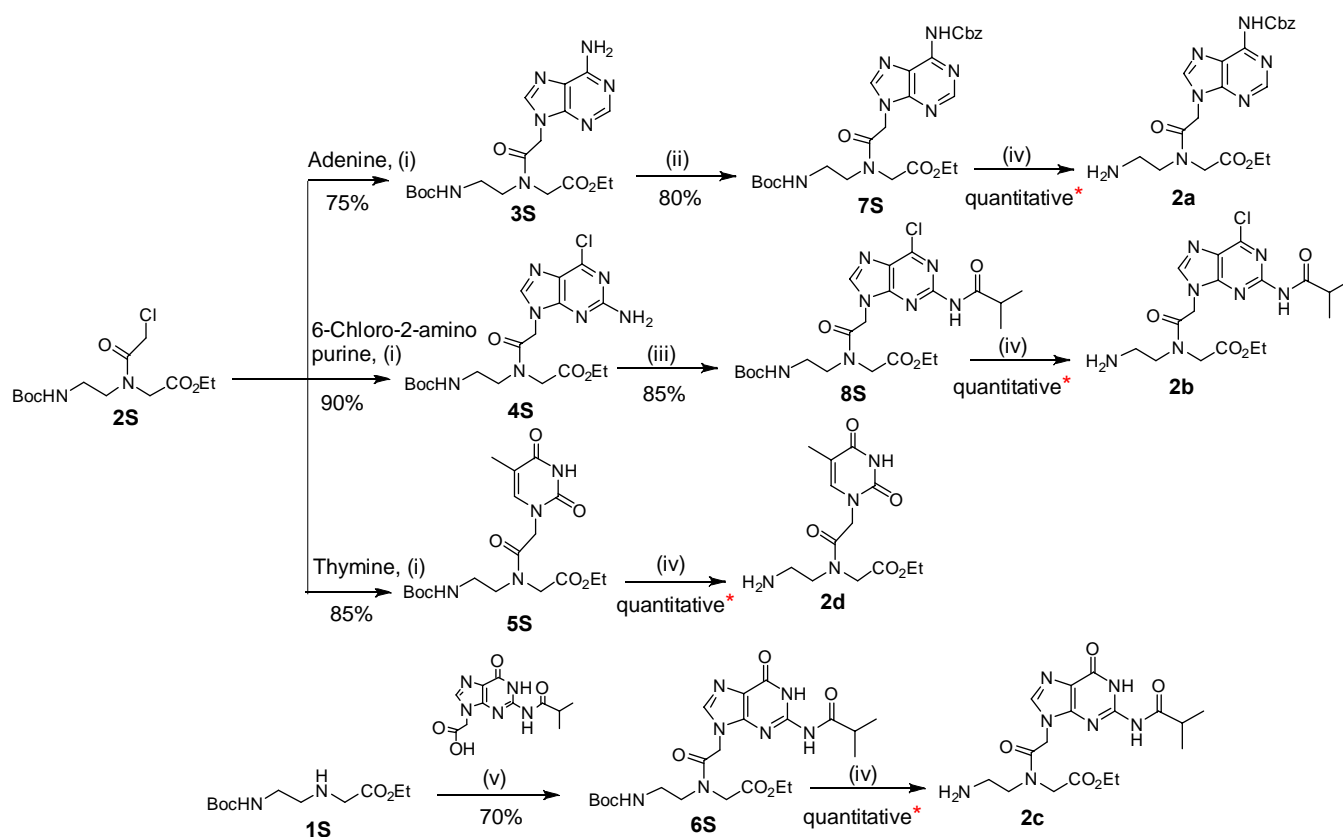

\* According to conversion observed in TLC

Reagents and conditions: (i) K<sub>2</sub>CO<sub>3</sub>, DMF, 75°C, 3 h; (ii) Cbz-Cl, NaHCO<sub>3</sub>, rt, 8 h; (iii) Isobutyrylchloride, dry Py, 12.5 h; (iv) 50% TFA in DCM, 0 °C-rt, 4-6 h; (v) EDC.HCl, HOBT, DIPEA, dry DMF, 0°C-rt, 36 h

**Scheme S1:** Synthesis of PNA monomers for amide coupling

To conjugate PNA motifs with Boc-Phe-Phe-Propyne (**4**), azidoethylglycyl backbone **9S**<sup>2</sup> was synthesized first following the literature procedure. Compound **9S** was coupled with *N*<sup>6</sup>-Bis(*tert*butyloxycarbonyl)-9-(carboxymethyl)adenine, *N*<sup>6</sup>-(Benzyloxycarbonyl)-9-(carboxymethyl)adenine, *N*<sup>2</sup>-(Isobutyryl)-9-(carboxymethyl)guanine and, thymine-1-ylacetic acid in presence of isobutyl chloroformate (IBCF) and *N*-methylmorpholine (NMM) to afford **5a-d** respectively (Scheme S2).

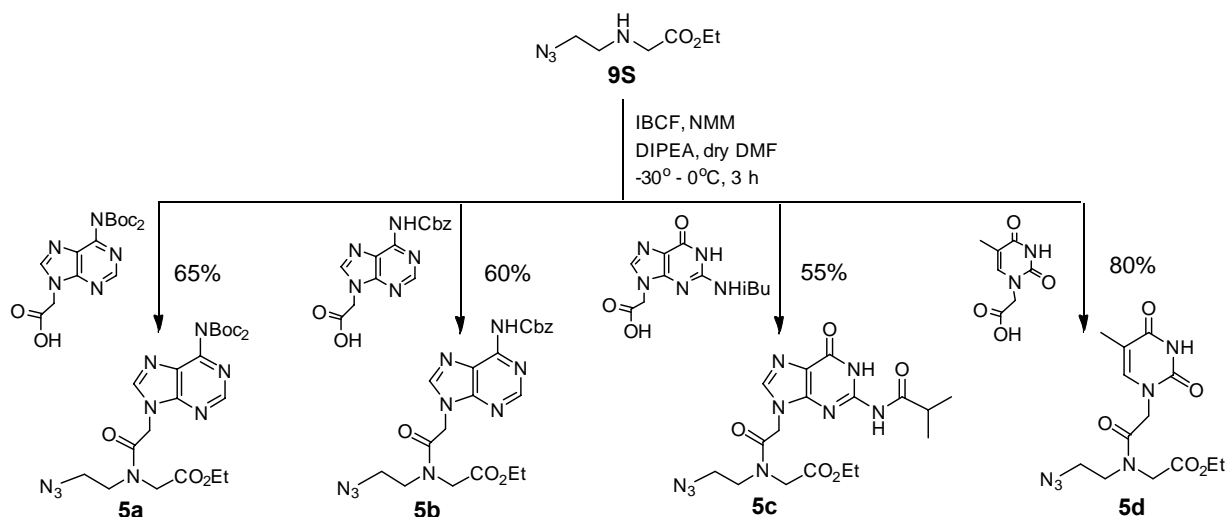

**Scheme S2:** Synthesis of PNA monomers for 'Click' conjugation

### Spectroscopic data:

**Compound 1S:** Compound **1S** was prepared following the known literature procedure<sup>1</sup>. <sup>1</sup>H NMR, (400 MHz, CDCl<sub>3</sub>, 25°C, TMS)  $\delta$  = 5.10 (s, 1H), 4.19 (q, *J* = 7.1 Hz, 2H), 3.40 (s, 2H), 3.22 (d, *J* = 5.2 Hz, 2H), 2.74 (t, *J* = 5.6 Hz, 2H), 1.44 (s, 9H), 1.28 ppm (td, *J* = 7.1, 1.2 Hz, 3H); <sup>13</sup>C NMR (100 MHz, CDCl<sub>3</sub>)  $\delta$  = 172.7, 156.3, 79.4, 61.0, 50.6, 48.9, 40.3, 28.6, 14.4 ppm. HRMS (ESI<sup>+</sup>), *m/z* calculated for (M+H)<sup>+</sup> C<sub>11</sub>H<sub>23</sub>N<sub>2</sub>O<sub>4</sub>: 247.1658, found: 247.1666.

**Compound 2S:** Compound **2S** was synthesized following the known literature procedure<sup>1</sup>. <sup>1</sup>H NMR, (400 MHz, CDCl<sub>3</sub>, 25°C, TMS)  $\delta$  = 5.60 (s, 1H), 4.28 – 4.17 (m, 4H), 4.05 (s, 2H), 3.54 (t, *J* = 5.8 Hz, 2H), 3.29 (dd, *J* = 11.7, 5.9 Hz, 2H), 1.50 – 1.38 (m, 9H), 1.35 – 1.21 ppm (m, 3H); <sup>13</sup>C NMR (100 MHz, CDCl<sub>3</sub>)  $\delta$  = 169.6, 169.1, 167.7, 167.6, 156.2, 156.1, 79.7, 79.3, 62.1, 61.6, 50.5, 49.5, 49.0, 48.2, 41.2, 40.8, 38.6, 38.3, 28.3, 14.1 ppm. HRMS (ESI<sup>+</sup>), *m/z* calculated for (M+Na)<sup>+</sup> C<sub>13</sub>H<sub>23</sub>ClN<sub>2</sub>O<sub>5</sub>Na: 345.1192, found: 345.1198.

**Compound 3S:** Compound **3S** was synthesized following the known procedure<sup>1</sup>. <sup>1</sup>H NMR, (400 MHz, CDCl<sub>3</sub>, 25°C, TMS)  $\delta$  = 8.28 (d, *J* = 5.2 Hz, 1H), 7.92 (d, *J* = 16.5 Hz, 1H), 6.22 (d, *J* = 17.1 Hz, 2H), 5.84 (s, 0.75H), 5.23 (s, 0.25H), 5.07 (d, *J* = 8.1 Hz, 1.5H), 4.93 (s, 0.5H), 4.27 (s, 0.5H), 4.23 (dd, *J* = 14.3, 7.2 Hz, 0.5H), 4.16 (q, *J* = 7.2 Hz, 1.5H), 4.03 (s, 1.5H), 3.60 (t, *J* = 5.4 Hz, 1.5H), 3.52 (d, *J* = 5.5 Hz, 0.5H), 3.36 (d, *J* = 5.4 Hz,

1.5H), 3.25 (d,  $J = 5.8$  Hz, 0.5H), 1.39 (s, 9H), 1.29 (t,  $J = 7.1$  Hz, 1H), 1.23 ppm (t,  $J = 7.1$  Hz, 2H);  $^{13}\text{C}$  NMR (100 MHz,  $\text{CDCl}_3$ )  $\delta = 169.6, 169.2, 167.4, 167.0, 156.2, 155.7, 153.1, 150.3, 141.6, 119.0, 80.1, 79.6, 62.4, 61.8, 50.6, 49.2, 48.8, 43.9, 43.6, 38.8, 38.5, 28.5, 14.2, 14.2$  ppm. HRMS ( $\text{ESI}^+$ ),  $m/z$  calculated for  $(\text{M}+\text{H})^+$   $\text{C}_{18}\text{H}_{28}\text{N}_7\text{O}_5$ : 422.2152, found: 422.2148.

**Compound 4S:** Compound **4S** was synthesized following the known literature procedure<sup>1</sup>.  $^1\text{H}$  NMR, (400 MHz,  $\text{CDCl}_3$ , 25°C, TMS)  $\delta = 7.82$  (s, 1H), 5.75 (s, 1H), 5.41 (dd,  $J = 38.2, 19.2$  Hz, 2H), 4.96 (s, 1.5H), 4.80 (s, 0.5H), 4.27 – 4.12 (m, 2H), 4.03 (s, 2H), 3.55 (dt,  $J = 28.7, 5.8$  Hz, 2H), 3.39 – 3.19 (m, 2H), 1.38 (s, 9H), 1.22 ppm (td,  $J = 7.2, 1.8$  Hz, 3H);  $^{13}\text{C}$  NMR (100 MHz,  $\text{CDCl}_3$ )  $\delta = 171.3, 169.6, 167.1, 166.7, 159.3, 156.2, 154.1, 151.2, 143.3, 124.5, 80.2, 62.5, 61.9, 60.5, 49.2, 49.1, 48.8, 43.6, 38.8, 28.5, 21.1, 14.2, 14.2, 14.1$  ppm. HRMS ( $\text{ESI}^+$ ),  $m/z$  calculated for  $(\text{M}+\text{H})^+$   $\text{C}_{18}\text{H}_{27}\text{ClN}_7\text{O}_5$ : 456.1762, found: 456.1762.

**Compound 5S:**  $^1\text{H}$  NMR, (400 MHz,  $\text{CDCl}_3$ , 25°C, TMS)  $\delta = 8.88$  (s, 1H), 7.02 (s, 0.35H), 6.96 (s, 0.65H), 5.61 (s, 1H), 4.56 (s, 1.5H), 4.41 (s, 0.5H), 4.29 – 4.14 (m, 4H), 4.03 (d,  $J = 3.5$  Hz, 2H), 3.51 (dt,  $J = 12.2, 6.3$  Hz, 2H), 3.31 (ddd,  $J = 18.3, 12.7, 6.7$  Hz, 2H), 1.93 – 1.90 (m, 3H), 1.46 – 1.39 (m, 9H), 1.31 – 1.23 ppm (m, 3H);  $^{13}\text{C}$  NMR (100 MHz,  $\text{CDCl}_3$ )  $\delta = 169.8, 169.5, 168.0, 167.6, 164.6, 156.2, 151.4, 141.1, 110.8, 79.9, 79.5, 62.3, 61.7, 50.5, 49.1, 48.8, 47.9, 47.8, 38.8, 28.5, 14.2, 12.4$  ppm. HRMS ( $\text{ESI}^+$ ),  $m/z$  calculated for  $(\text{M}+\text{Na})^+$   $\text{C}_{18}\text{H}_{28}\text{N}_4\text{O}_7\text{Na}$ : 435.1856, found: 435.1860.

**Compound 6S:** Compound **6S** was synthesized following the known literature procedure<sup>3</sup>.  $^1\text{H}$  NMR, (400 MHz,  $\text{DMSO}-d_6$ , 25°C)  $\delta = 12.08$  (d,  $J = 5.5$  Hz, 1H), 11.65 (d,  $J = 7.6$  Hz, 1H), 7.83 (s, 0.7H), 7.82 (s, 0.3H), 7.03 (t,  $J = 5.5$  Hz, 0.7H), 6.76 (s, 0.3H), 5.13 (s, 1.4H), 4.97 (s, 0.6H), 4.42 (s, 0.6H), 4.22 (q,  $J = 7.1$  Hz, 0.6H), 4.08 (q,  $J = 7.0$  Hz, 2.8H), 3.50 (t,  $J = 6.5$  Hz, 1.4H), 3.32 (d,  $J = 11.9$  Hz, 0.6H), 3.24 (d,  $J = 6.1$  Hz, 1.4H), 3.02 (d,  $J = 6.1$  Hz, 0.6H), 2.84 – 2.71 (m, 1H), 1.37 (d,  $J = 6.5$  Hz, 9H), 1.27 (t,  $J = 7.1$  Hz, 1H), 1.17 (t,  $J = 7.1$  Hz, 2H), 1.11 ppm (d,  $J = 6.7$  Hz, 6H);  $^{13}\text{C}$  NMR (100 MHz,  $\text{DMSO}-d_6$ , 25°C)  $\delta = 180.2, 180.1, 169.5, 169.0, 167.0, 166.6, 155.8, 155.6, 154.9, 149.1, 149.2, 147.9, 147.9, 140.5, 140.4, 119.6, 78.2, 77.8, 61.3, 60.6, 49.1, 47.8, 46.9, 44.1, 43.9, 38.3, 37.7, 34.7, 34.7, 28.2, 18.9, 14.0$  ppm. HRMS ( $\text{ESI}^+$ ),  $m/z$  calculated for  $(\text{M}+\text{H})^+$   $\text{C}_{22}\text{H}_{34}\text{N}_7\text{O}_7$ : 508.2520, found: 508.2535.

**Compound 7S:** To a suspension of **3S** (0.42g, 1.00 mmol) in satd  $\text{NaHCO}_3$  solution (30 mL) at 0°C was added  $\text{Cbz-Cl}$  (0.20 g, 1.2 mmol). The resulting mixture was stirred at room temperature for 8 h.  $\text{EtOAc}$  (20 mL) was added to the reaction mixture and the organic layer was separated. Aqueous layer was further extracted with  $\text{EtOAc}$  (25x2 mL). The combined organic layer was dried over anhyd  $\text{Na}_2\text{SO}_4$ , filtered and the filtrate was evaporated to dryness in vacuo. The crude residue was purified by column chromatography [Eluent: 20-90%



EtOAc in hexane] to afford compound **7S** (0.44 g, 80%) as hygroscopic solid.  $^1\text{H}$  NMR, (400 MHz,  $\text{CDCl}_3$ , 25°C, TMS)  $\delta$  = 8.97 (s, 1H), 8.16 (s, 1H), 7.36 – 7.18 (m, 8H), 6.36 (d,  $J$  = 11.2 Hz, 1H), 5.61 – 5.25 (m, 0.6H), 5.10 (s, 2H), 5.07 (d,  $J$  = 4.8 Hz, 2H), 4.93 (d,  $J$  = 5.4 Hz, 0.3H), 4.27 – 4.09 (m, 4H), 4.08 – 3.94 (m, 2H), 3.45 (dd,  $J$  = 24.5, 5.4 Hz, 2H), 3.29 – 3.16 (m, 2H), 1.38 – 1.29 (m, 9H), 1.25 – 1.16 ppm (m, 3H);  $^{13}\text{C}$  NMR (100 MHz,  $\text{CDCl}_3$ )  $\delta$  = 169.9, 169.6, 169.5, 169.0, 159.8, 156.1, 155.6, 154.4, 153.9, 151.0, 136.1, 136.1, 135.5, 128.7, 128.6, 128.6, 128.6, 128.4, 128.3, 128.2, 128.1, 105.9, 80.0, 79.6, 68.1, 67.7, 67.6, 62.2, 61.8, 49.7, 48.9, 48.8, 48.3, 42.9, 38.7, 28.5, 14.2 ppm. HRMS (ESI<sup>+</sup>),  $m/z$  calculated for  $(\text{M}+\text{H})^+$   $\text{C}_{26}\text{H}_{34}\text{N}_7\text{O}_7$ : 556.2520, found: 556.2511.

**Compound 8S:** Compound **4S** was converted to **8S** following the procedure described in the *Eur. Pat. Appl. 2001*, EP 1085020 A1 20010321. To a solution of **4S** (0.45 g, 1.00 mmol) in dry pyridine (10 mL) at 0°C was added isobutyrylchloride (0.13 g, 1.2 mmol). The resulting mixture was stirred at 0°C for 30 min, followed by 12 h at room temperature. Satd  $\text{NaHCO}_3$  solution (20 mL) was added to the reaction mixture and extracted with EtOAc (25x3 mL). The combined organic layer was dried over anhyd  $\text{Na}_2\text{SO}_4$ , filtered and the filtrate was evaporated to dryness in vacuo. The crude residue was purified by flash column chromatography [Eluent: 20-70% EtOAc in hexane] to afford compound **6S** (0.44 g, 85%) as hygroscopic solid.  $^1\text{H}$  NMR, (400 MHz,  $\text{CDCl}_3$ , 25°C, TMS)  $\delta$  = 8.31 (s, 1H), 8.21 (s, 0.7H), 8.13 (s, 0.3H), 6.29 (s, 0.75H), 5.30 (d,  $J$  = 16.6 Hz, 0.25H), 5.14 (s, 1.7H), 4.98 (d,  $J$  = 12.4 Hz, 0.3H), 4.36 (s, 0.3H), 4.27 (q,  $J$  = 7.1 Hz, 0.3H), 4.17 (q,  $J$  = 7.1 Hz, 1.7H), 4.14 – 4.08 (m, 1.7H), 3.67 (t,  $J$  = 5.8 Hz, 1.7H), 3.55 (t,  $J$  = 5.8 Hz, 0.3H), 3.43 (dd,  $J$  = 11.9, 5.9 Hz, 1.7H), 3.29 – 3.21 (m, 0.3H), 2.77 - 2.71 (m, 1H), 1.40 (s, 2H), 1.32 (dd,  $J$  = 13.7, 6.6 Hz, 1H), 1.27 (d,  $J$  = 3.5 Hz, 4H), 1.25 (d,  $J$  = 1.0 Hz, 5H), 1.22 ppm (s, 6H);  $^{13}\text{C}$  NMR (100 MHz,  $\text{CDCl}_3$ )  $\delta$  = 175.4, 169.4, 166.5, 156.6, 152.9, 151.9, 151.1, 146.0, 127.8, 79.5, 62.5, 61.7, 60.5, 50.9, 49.1, 48.8, 44.3, 43.6, 38.5, 36.7, 28.5, 28.4, 19.4, 14.3, 14.2 ppm. HRMS (ESI<sup>+</sup>),  $m/z$  calculated for  $(\text{M}+\text{H})^+$   $\text{C}_{22}\text{H}_{33}\text{ClN}_7\text{O}_6$ : 526.2181, found: 526.2173.

**General procedure of Boc deprotection:** To an ice-cold mixture of compound (0.5 mmol in 5 mL), 2 mL TFA was added slowly and stirred for 4-6 h at rt. Completion of reaction was monitored by TLC. The volatile part of the reaction mixture was completely removed by co-evaporation with toluene and carbontetrachloride to afford TFA salts of compound **2a-d** as brown oil which were used for amide coupling reaction without further purification.

**Compound 2a:** HRMS (ESI<sup>+</sup>),  $m/z$  calculated for  $(\text{M}+\text{H})^+$   $\text{C}_{21}\text{H}_{26}\text{N}_7\text{O}_5$ : 456.1995, found: 456.1985.

**Compound 2b:** HRMS (ESI<sup>+</sup>),  $m/z$  calculated for  $(\text{M}+\text{H})^+$   $\text{C}_{17}\text{H}_{25}\text{ClN}_7\text{O}_4$ : 426.1656, found: 426.1642.

**Compound 2c:** White solid. M.p. 97-100°C; <sup>1</sup>H NMR, (400 MHz, DMSO-d<sub>6</sub>, 25°C): δ = 12.09 (d, *J* = 5.1 Hz, 1H), 11.63 (d, *J* = 6.1 Hz, 1H), 8.04 (s, 1H), 7.87 (s, 0.5H), 7.82 (s, 0.5H), 7.78 (s, 1H), 5.17 (s, 1H), 4.98 (s, 1H), 4.46 (s, 1H), 4.22 (q, *J* = 7.1 Hz, 1H), 4.10 (dd, *J* = 12.2, 4.9 Hz, 2H), 3.70 (t, *J* = 6.7 Hz, 1H), 3.52 (t, *J* = 6.3 Hz, 1H), 3.17 (d, *J* = 5.4 Hz, 1H), 2.97 (dd, *J* = 10.9, 5.1 Hz, 1H), 2.86 – 2.68 (m, 1H), 1.27 (t, *J* = 7.1 Hz, 1.5H), 1.18 (t, *J* = 7.1 Hz, 1.5H), 1.11 ppm (d, *J* = 6.8 Hz, 6H); <sup>13</sup>C NMR (100 MHz, DMSO-d<sub>6</sub>, 25°C): δ = 180.2, 180.1, 169.5, 169.3, 168.0, 166.8, 158.9, 158.6, 158.3, 154.9, 149.3, 148.0, 147.9, 140.6, 119.4, 61.4, 60.9, 48.6, 47.7, 44.9, 44.8, 44.2, 44.1, 36.9, 36.7, 34.7, 34.7, 18.9, 18.9, 14.0, 14.0 ppm; HRMS (ESI<sup>+</sup>), *m/z* calculated for (M+H)<sup>+</sup> C<sub>17</sub>H<sub>26</sub>N<sub>7</sub>O<sub>5</sub>: 408.1995, found: 408.1992.

**Compound 2d:** HRMS (ESI<sup>+</sup>), *m/z* calculated for (M+H)<sup>+</sup> C<sub>13</sub>H<sub>21</sub>N<sub>4</sub>O<sub>5</sub>: 313.1512, found: 313.1514.

**Compound 9S:** Compound 9S was synthesized following previously mentioned literature<sup>2</sup>. <sup>1</sup>H NMR, (400 MHz, CDCl<sub>3</sub>, 25°C, TMS) δ = 4.20 (q, *J* = 7.2 Hz, 2H), 3.46 – 3.39 (m, 4H), 2.88 – 2.79 (m, 2H), 2.00 (s, 1H), 1.32 – 1.24 ppm (m, 3H); <sup>13</sup>C NMR (100 MHz, CDCl<sub>3</sub>) δ = 172.2, 60.9, 51.5, 50.6, 48.2, 14.3 ppm; IR: ν<sub>N3</sub> = 2101 cm<sup>-1</sup>; HRMS (ESI<sup>+</sup>), *m/z* calculated for (M+H)<sup>+</sup> C<sub>6</sub>H<sub>13</sub>N<sub>4</sub>O<sub>2</sub>: 173.1038, found: 173.1044.

**Compound 4:** Compound 4 was synthesized following the reported procedure.<sup>4</sup> <sup>1</sup>H NMR, (400 MHz, CDCl<sub>3</sub>, 25°C, TMS) δ = 7.24 (dt, *J* = 6.4, 4.1 Hz, 3H), 7.18 – 7.02 (m, 6H), 6.91 (t, *J* = 18.1 Hz, 2H), 6.54 (s, 1H), 6.28 (s, 1H), 4.84 (d, *J* = 5.9 Hz, 1H), 4.72 – 4.54 (m, 1H), 4.20 (d, *J* = 6.0 Hz, 1H), 3.92 (ddd, *J* = 21.0, 11.9, 9.0 Hz, 1H), 3.77 (dd, *J* = 17.5, 2.4 Hz, 1H), 3.14 (s, 1H), 2.99 – 2.76 (m, 3H), 2.08 (t, *J* = 2.5 Hz, 1H), 1.25 ppm (s, 9H); <sup>13</sup>C NMR (100 MHz, CDCl<sub>3</sub>) δ = 171.0, 170.3, 155.9, 136.0, 129.4, 129.3, 129.0, 128.8, 81.02, 79.2, 71.3, 56.3, 53.4, 37.8, 37.5, 29.2, 28.3, 28.2 ppm. HRMS (ESI<sup>+</sup>), *m/z* calculated for (M+Na)<sup>+</sup> C<sub>26</sub>H<sub>31</sub>N<sub>3</sub>O<sub>4</sub>Na: 472.2212, found: 472.2213.

#### **General procedure of coupling azide backbone with nucleobase acetic acid:**

1. To a mixture of nucleobase acetic acid (0.5 mmol) in dry DMF (5mL), NMM (0.5 mmol) and IBCF (0.5 mmol) were added slowly and cooled to -50 °C. To the white semisolid mass obtained after 0.5 h, compound 9S (0.4 mmol) dissolved in dry DMF (1.5 mL) and diisopropylethylamine (DIPEA) (2.0 mmol) were slowly added at 0 °C. Reaction mixture was maintained at 0 °C for 0.5 h and then kept at rt for 6 h. Brine solution was added and extracted with EtOAc (3x50 mL). Combined organic layer was dried over anhyd Na<sub>2</sub>SO<sub>4</sub> and evaporated to dryness. Crude mass thus obtained was purified by column chromatography.
2. *N*<sup>2</sup>-(Isobutryl)-9-(carboxymethyl)guanine was coupled with the azide backbone 9S following the procedure mentioned for compound 3a-d (main manuscript) to afford 5c in good yield (75%).

**Compound 5a:**  $^1\text{H}$  NMR, (400 MHz,  $\text{CDCl}_3$ ,  $25^\circ\text{C}$ , TMS)  $\delta$  = 8.83 (d,  $J$  = 3.0 Hz, 1H), 8.24 (s, 1H), 5.32 (s, 1H), 5.09 (s, 1H), 4.37 (s, 1H), 4.32 (q,  $J$  = 7.2 Hz, 1H), 4.20 (q,  $J$  = 7.1 Hz, 1H), 4.14 (s, 1H), 3.74 – 3.70 (m, 1H), 3.67 (d,  $J$  = 4.8 Hz, 1H), 3.60 – 3.52 (m, 2H), 1.43 (d,  $J$  = 2.7 Hz, 18H), 1.36 (t,  $J$  = 7.1 Hz, 1.5H), 1.26 ppm (t,  $J$  = 7.1 Hz, 1.5H);  $^{13}\text{C}$  NMR (100 MHz,  $\text{CDCl}_3$ )  $\delta$  = 168.9, 168.7, 166.7, 166.5, 153.58, 153.5, 152.1, 150.4, 150.3, 150.3, 146.1, 145.9, 128.3, 83.8, 83.8, 62.5, 61.7, 51.1, 50.0, 49.9, 48.7, 48.4, 48.1, 44.0, 43.9, 27.8, 14.3, 14.2 ppm; IR:  $\nu_{\text{N}_3}$  = 2103  $\text{cm}^{-1}$ ; HRMS (ESI $^+$ ),  $m/z$  calculated for (M+H) $^+$   $\text{C}_{23}\text{H}_{34}\text{N}_9\text{O}_7$ : 548.2581, found: 548.2587.

**Compound 5b:**  $^1\text{H}$  NMR, (400 MHz,  $\text{CD}_3\text{OD}$  +  $\text{DMSO-d}_6$ , 2:1,  $25^\circ\text{C}$ )  $\delta$  = 8.22 (t,  $J$  = 12.7 Hz, 1H), 7.39 (d,  $J$  = 7.4 Hz, 1H), 7.31 (ddd,  $J$  = 22.2, 21.7, 7.0 Hz, 5H), 5.36 (s, 1H), 5.19 (s, 1H), 5.12 (d,  $J$  = 17.3 Hz, 1H), 4.20 (dd,  $J$  = 14.3, 7.1 Hz, 1H), 4.12 – 3.93 (m, 3H), 3.66 (d,  $J$  = 11.7 Hz, 3H), 3.53 – 3.42 (m, 1H), 3.38 (dd,  $J$  = 13.7, 8.0 Hz, 1H), 1.25 (dd,  $J$  = 14.3, 7.2 Hz, 1H), 1.13 ppm (t,  $J$  = 7.1 Hz, 2H);  $^{13}\text{C}$  NMR (100 MHz,  $\text{CD}_3\text{OD}$  +  $\text{DMSO-d}_6$ , 2:1)  $\delta$  = 170.1, 168.8, 168.4, 153.2, 153.1, 152.8, 150.4, 146.2, 137.3, 129.4, 129.1, 129.0, 67.8, 62.7, 61.9, 61.0, 50.7, 50.6, 49.9, 49.4, 45.1, 45.1, 14.4 ppm; IR:  $\nu_{\text{N}_3}$  = 2102  $\text{cm}^{-1}$ ; HRMS (ESI $^+$ ),  $m/z$  calculated for (M+H) $^+$   $\text{C}_{21}\text{H}_{24}\text{N}_9\text{O}_5$ : 482.1900, found: 482.1897.

**Compound 5c:**  $^1\text{H}$  NMR (400 MHz,  $\text{DMSO-d}_6$ ,  $25^\circ\text{C}$ )  $\delta$  = 12.08 (s, 1H), 11.65 (s, 0.3H), 11.62 (s, 0.7H), 7.88 (s, 0.6H), 7.83 (s, 0.4H), 5.20 (s, 1.3H), 4.99 (s, 0.7H), 4.48 (s, 0.7H), 4.22 (q,  $J$  = 7.1 Hz, 0.7H), 4.13 – 4.05 (m, 2.6H), 3.73 – 3.62 (m, 2.5H), 3.50 – 3.41 (m, 1.5H), 2.82 – 2.71 (m, 1H), 1.27 (t,  $J$  = 7.2 Hz, 1H), 1.17 (t,  $J$  = 7.1 Hz, 2H), 1.12 (s, 3H), 1.10 ppm (s, 3H);  $^{13}\text{C}$  NMR (400 MHz,  $\text{DMSO-d}_6$ ,  $25^\circ\text{C}$ )  $\delta$  = 180.1, 169.5, 168.9, 167.3, 166.9, 154.9, 149.3, 147.9, 140.7, 140.5, 119.6, 61.3, 60.6, 49.0, 48.3, 48.0, 46.8, 46.4, 44.2, 34.6, 18.9, 14.0 ppm; IR:  $\nu_{\text{N}_3}$  = 2105  $\text{cm}^{-1}$ ; HRMS (ESI $^+$ ),  $m/z$  calculated for (M+H) $^+$   $\text{C}_{17}\text{H}_{24}\text{N}_9\text{O}_5$ : 434.1900, found: 434.1903.

**Compound 5d:**  $^1\text{H}$  NMR, (400 MHz,  $\text{DMSO-d}_6$ ,  $25^\circ\text{C}$ ):  $\delta$  = 11.29 (s, 1H), 7.36 (d,  $J$  = 1.2 Hz, 0.7H), 7.29 (d,  $J$  = 1.2 Hz, 0.3H), 4.71 (s, 1.3H), 4.50 (s, 0.7H), 4.37 (s, 0.7H), 4.18 (q,  $J$  = 7.1 Hz, 0.8H), 4.13 – 4.03 (m, 2.5H), 3.63 (t,  $J$  = 5.4 Hz, 1.3H), 3.56 (t,  $J$  = 5.5 Hz, 1.3H), 3.50 – 3.46 (m, 0.7H), 3.43 (t,  $J$  = 5.3 Hz, 0.7H), 1.75 (d,  $J$  = 1.1 Hz, 3H), 1.25 (t,  $J$  = 7.1 Hz, 1H), 1.18 ppm (t,  $J$  = 7.1 Hz, 2H);  $^{13}\text{C}$  NMR (100 MHz,  $\text{DMSO-d}_6$ ,  $25^\circ\text{C}$ ):  $\delta$  = 169.3, 168.9, 168.0, 167.6, 164.4, 164.4, 151.0, 142.2, 142.0, 108.2, 108.1, 61.2, 60.6, 49.1, 48.3, 48.1, 47.9, 46.8, 46.3, 14.0, 14.0, 11.9 ppm; IR:  $\nu_{\text{N}_3}$  = 2103  $\text{cm}^{-1}$ ; HRMS (ESI $^+$ ),  $m/z$  calculated for (M+H) $^+$   $\text{C}_{13}\text{H}_{17}\text{N}_6\text{O}_5$ : 339.1417, found: 339.1420.

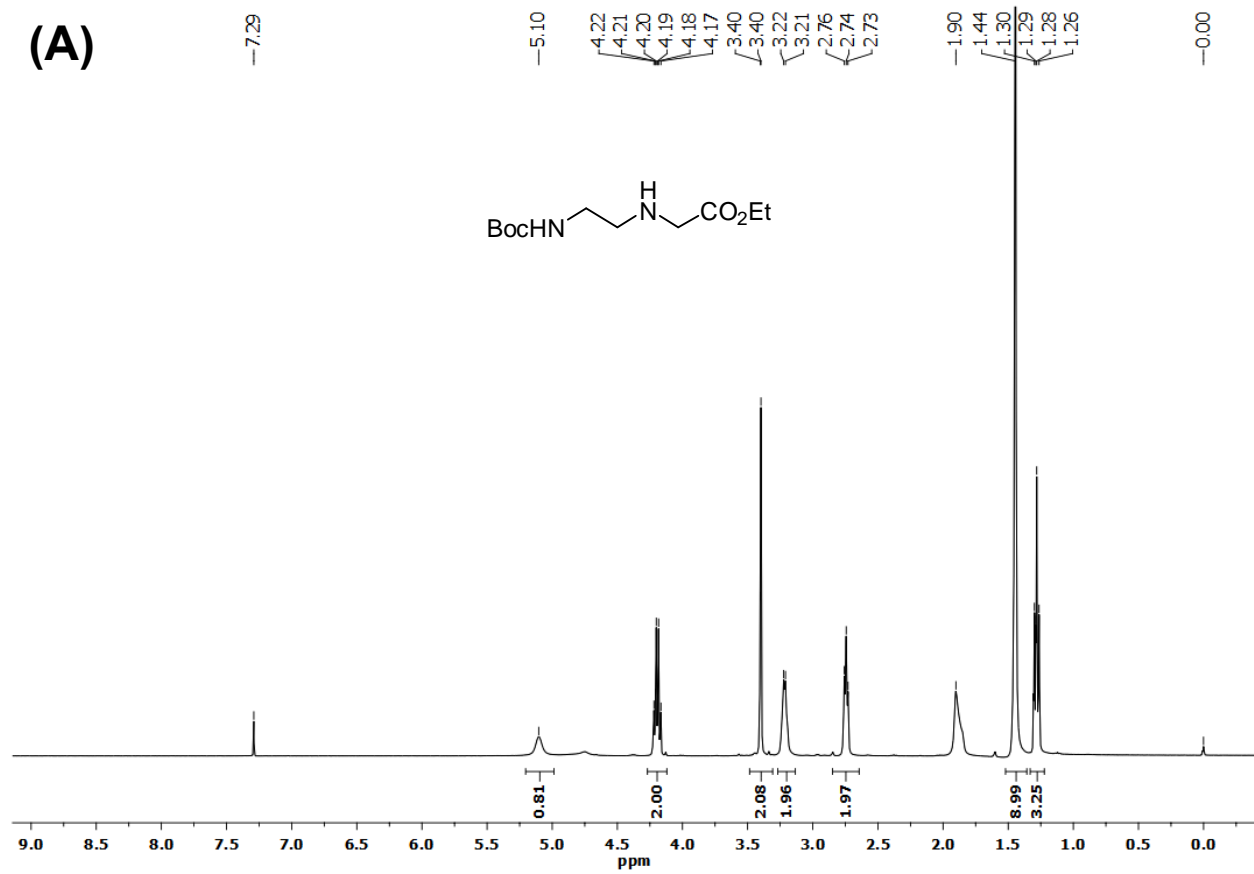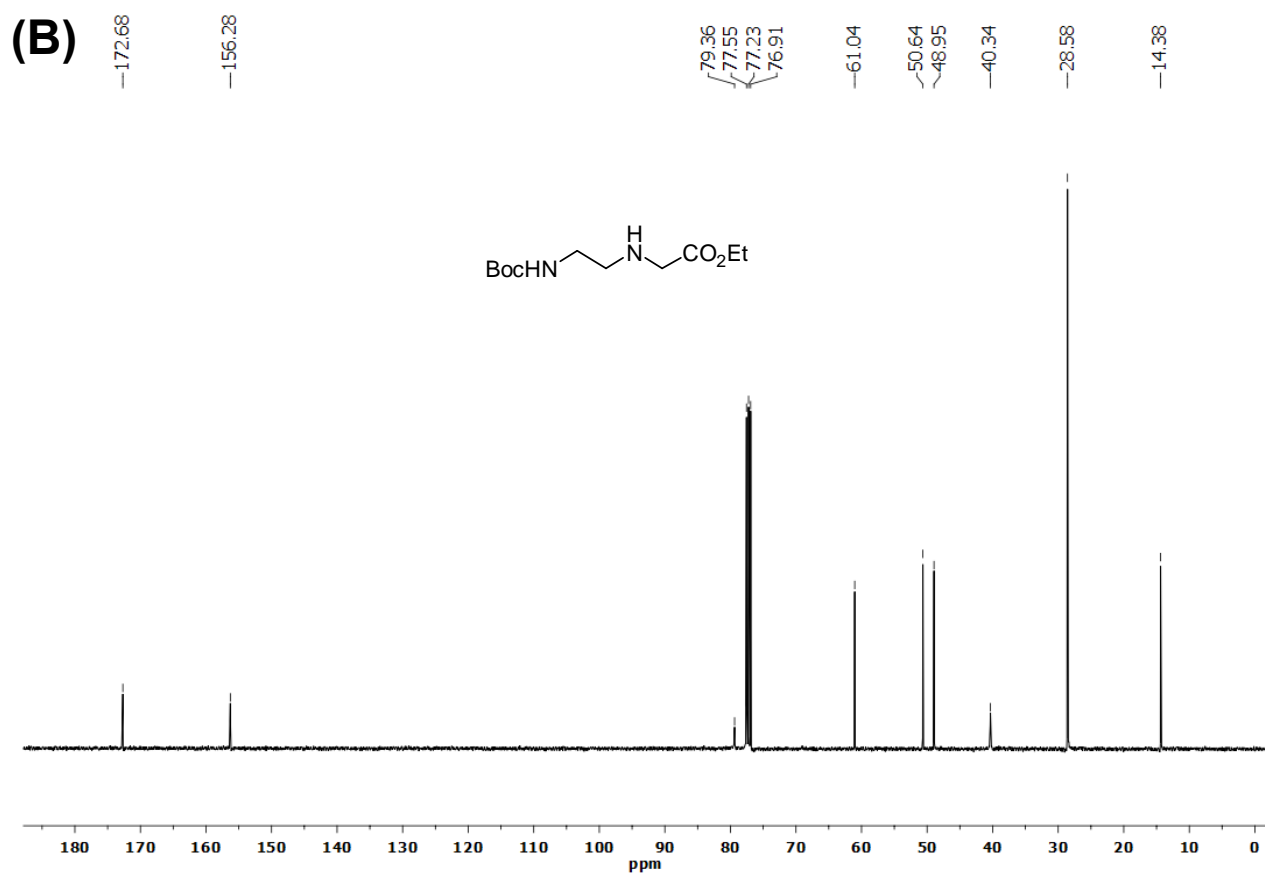

**Figure S1:** (A)  $^1\text{H}$ -NMR and (B)  $^{13}\text{C}$ -NMR spectra of **1S**.

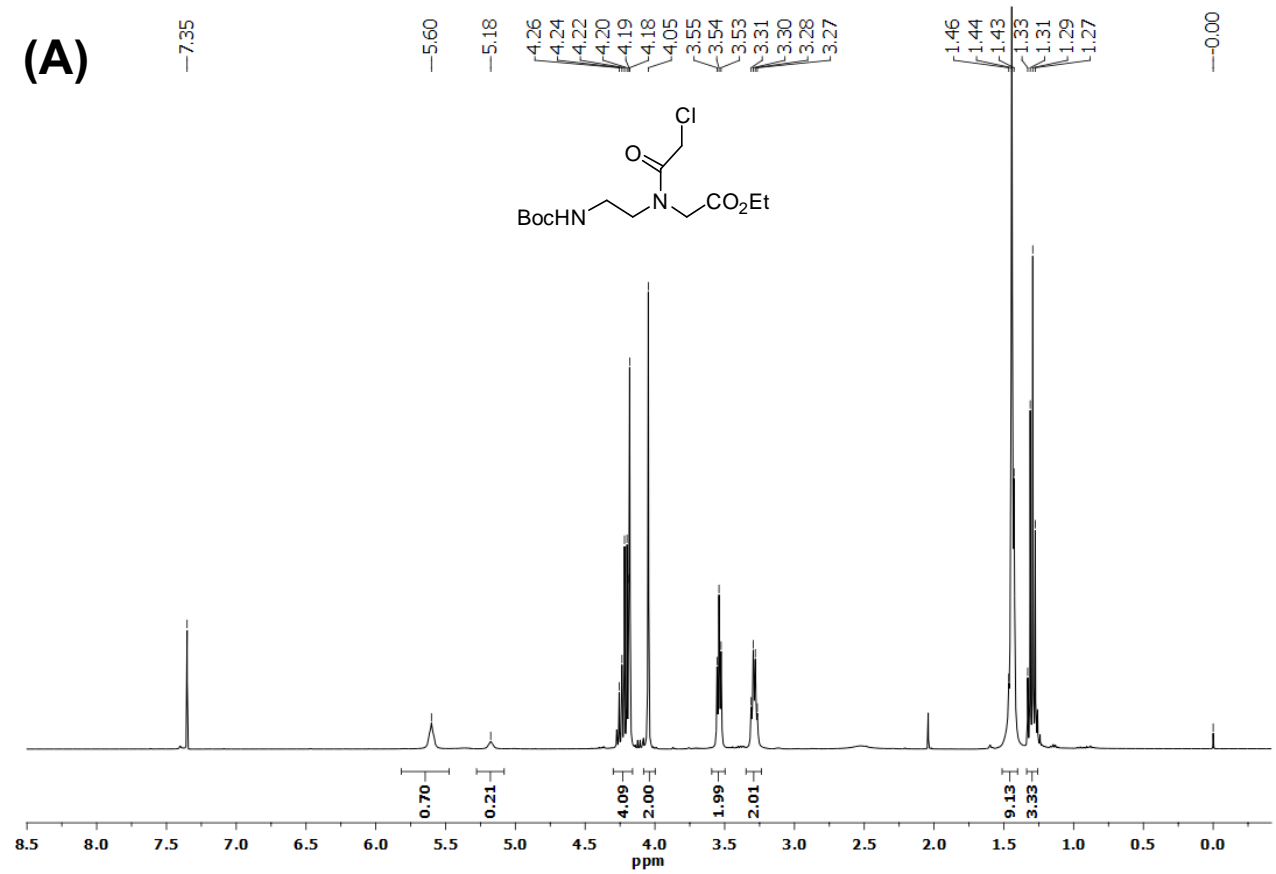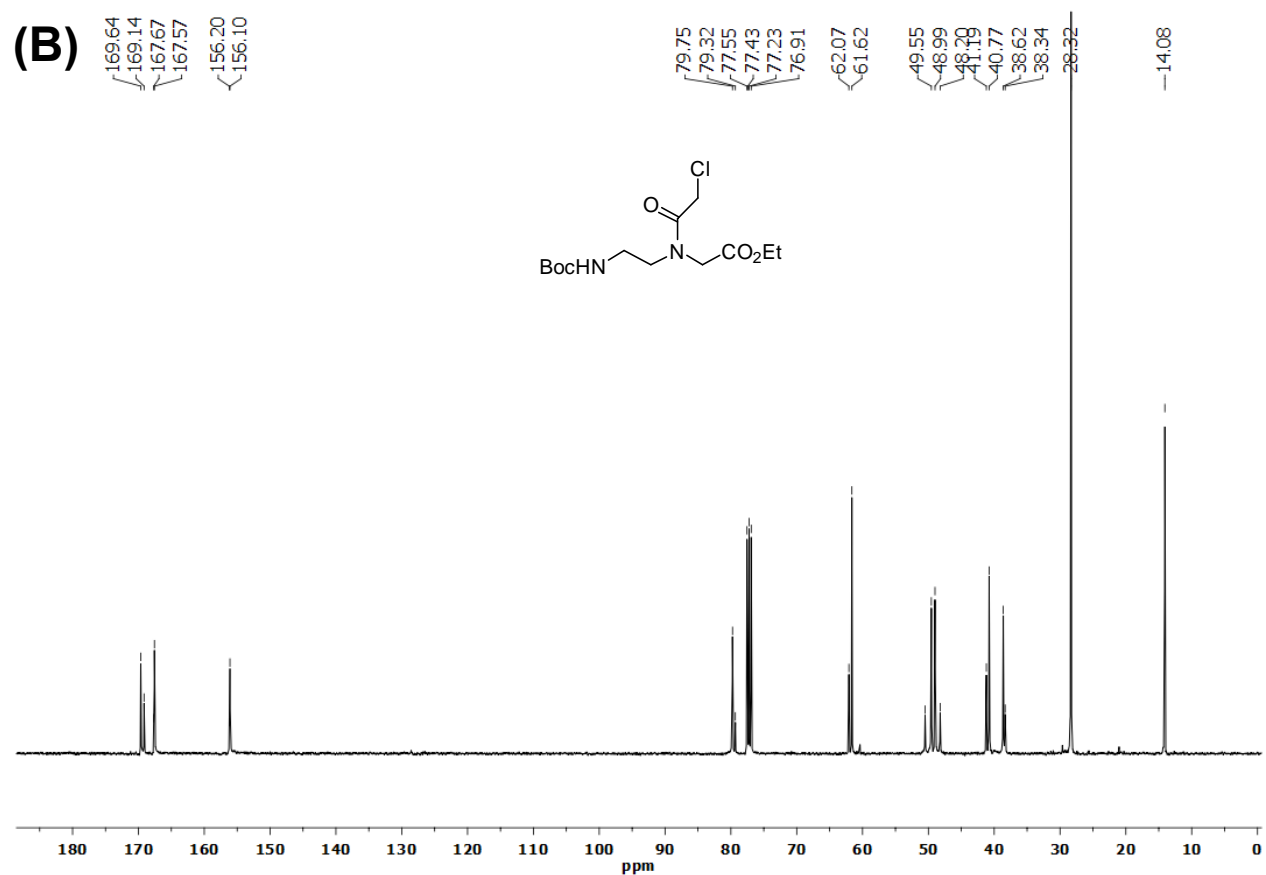

**Figure S2: (A)  $^1\text{H}$ -NMR and (B)  $^{13}\text{C}$ -NMR spectra of **2S****

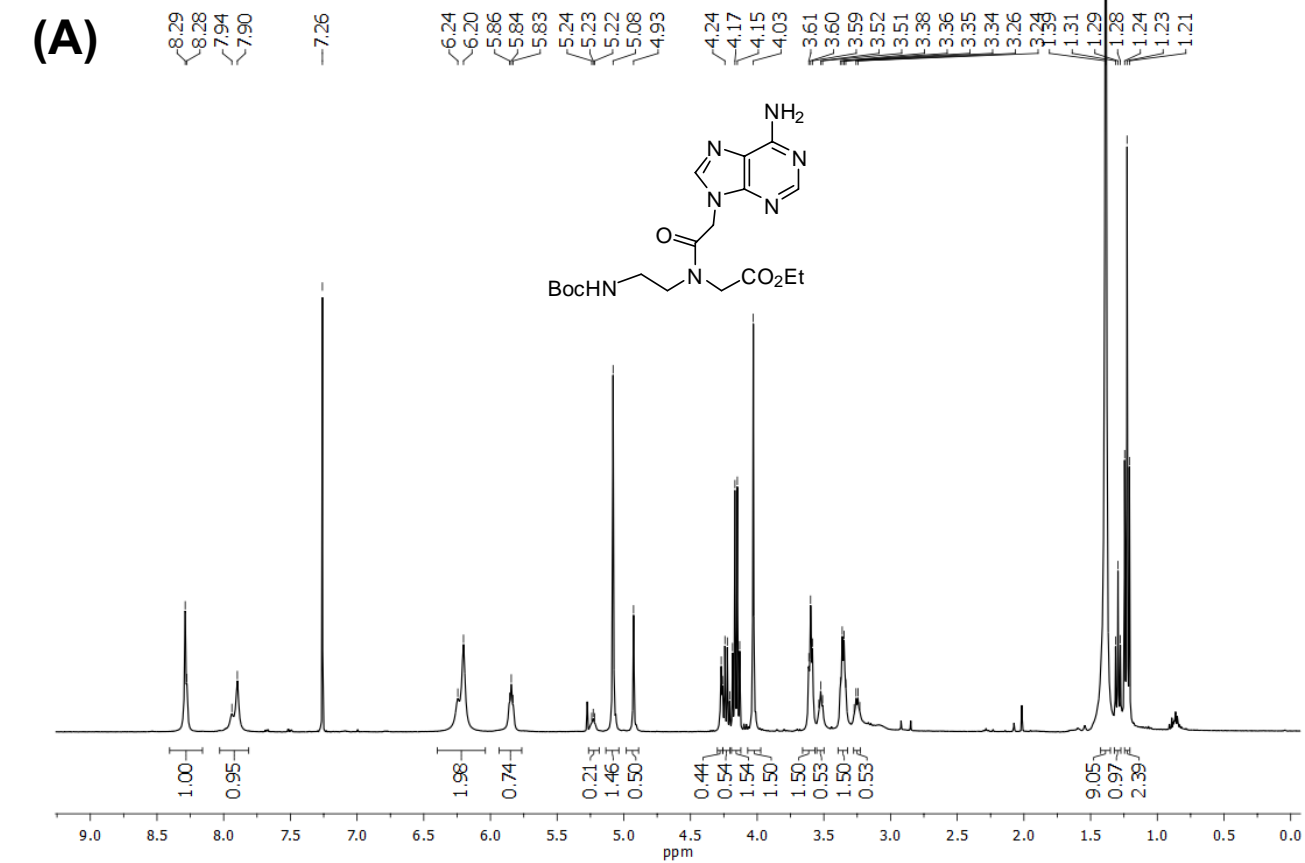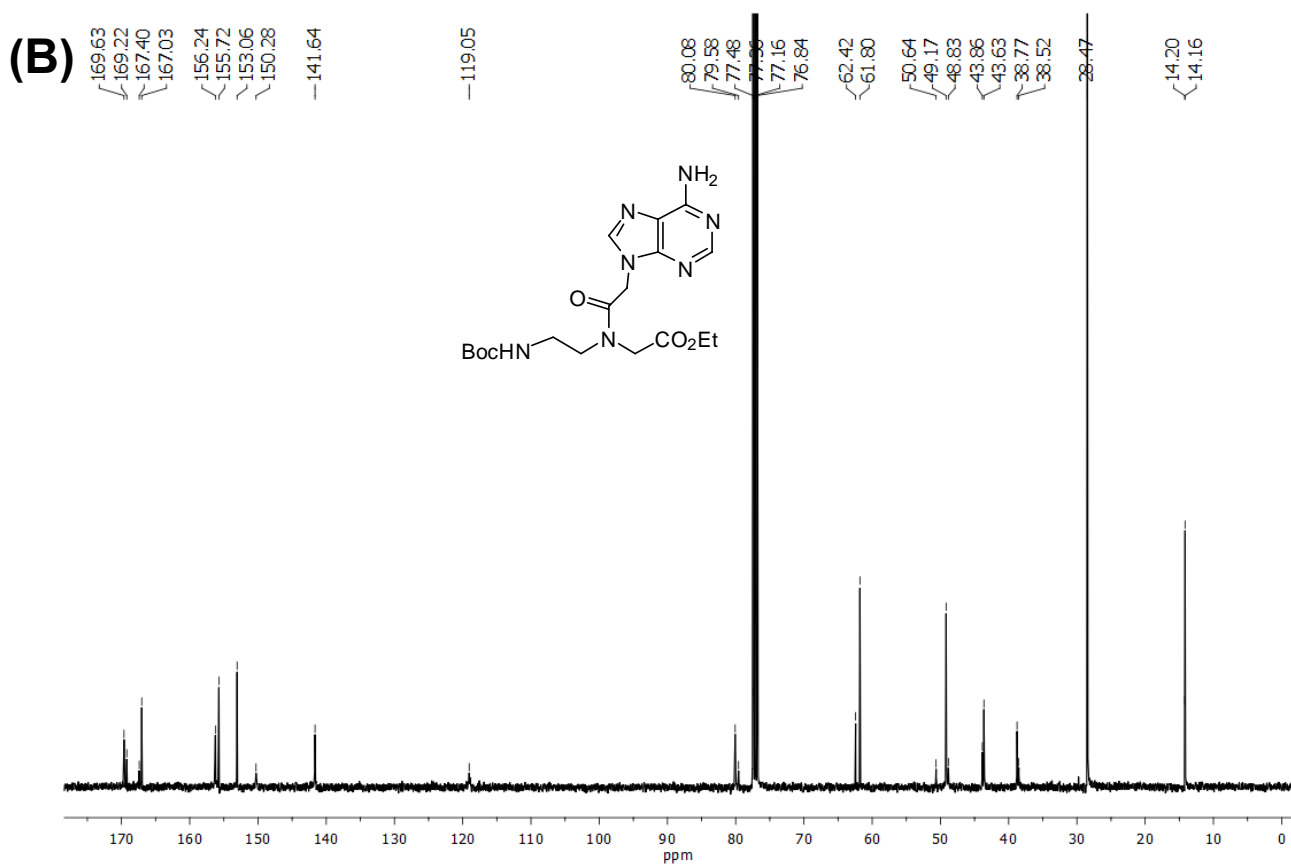

Figure S3: (A)  $^1\text{H}$ -NMR and (B)  $^{13}\text{C}$ -NMR spectra of 3S

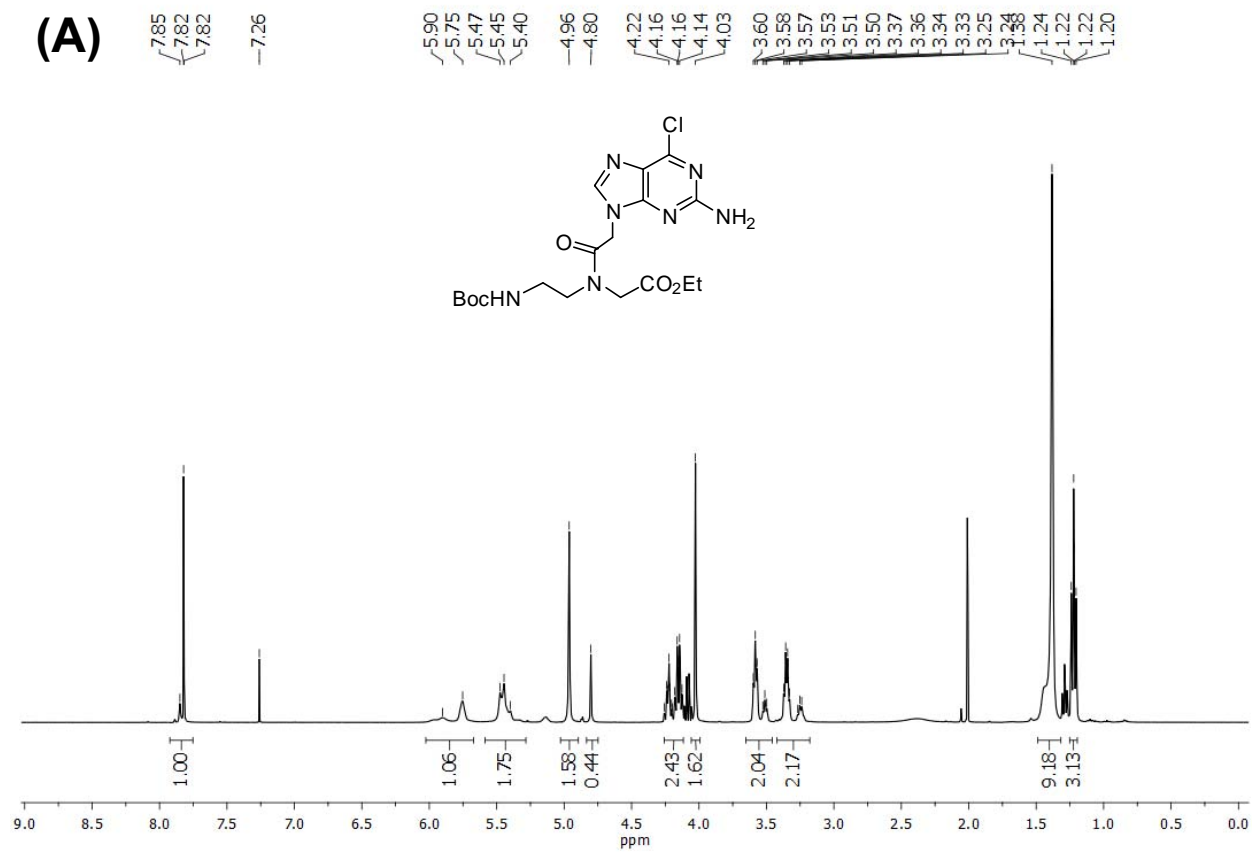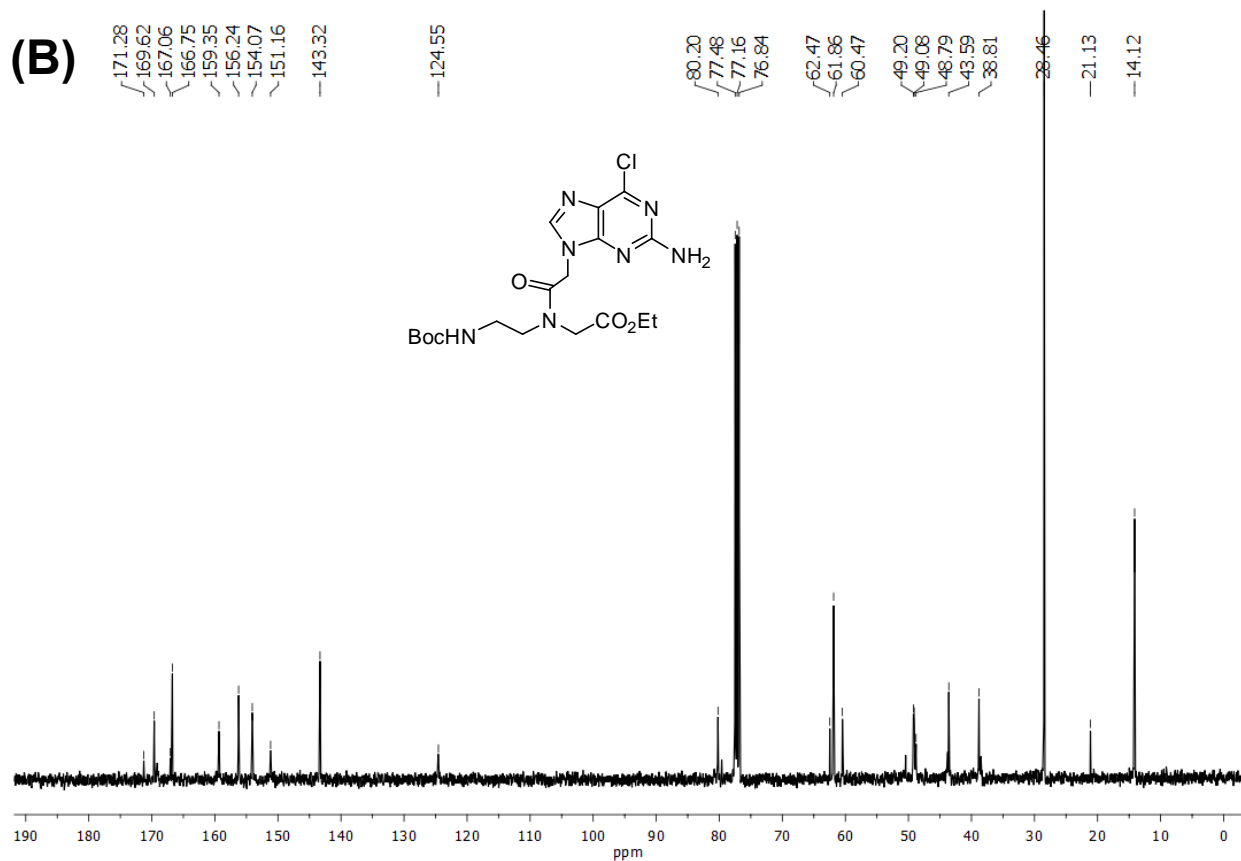

Figure S4: (A) <sup>1</sup>H-NMR and (B) <sup>13</sup>C-NMR spectra of 4S

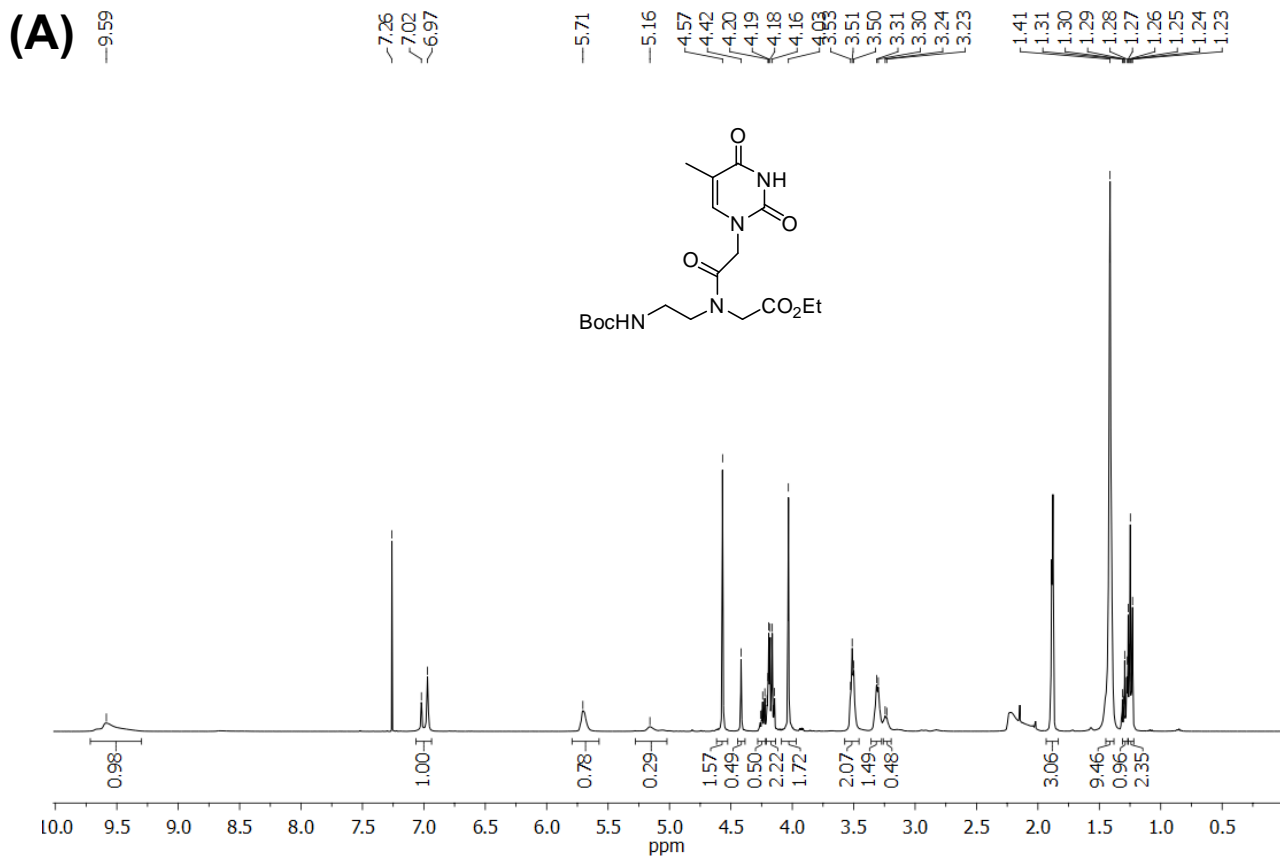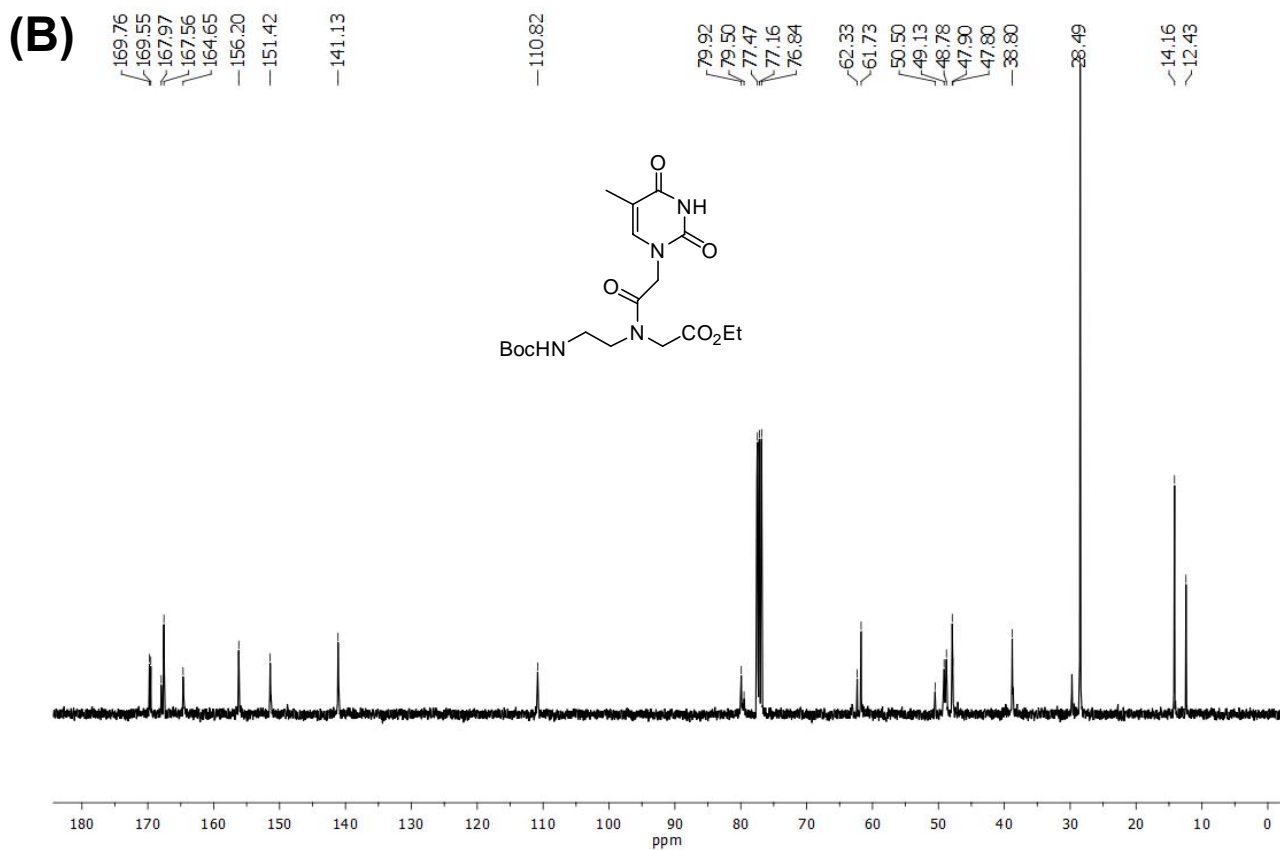

**Figure S5:** (A)  $^1\text{H-NMR}$  and (B)  $^{13}\text{C-NMR}$  spectra of 5S



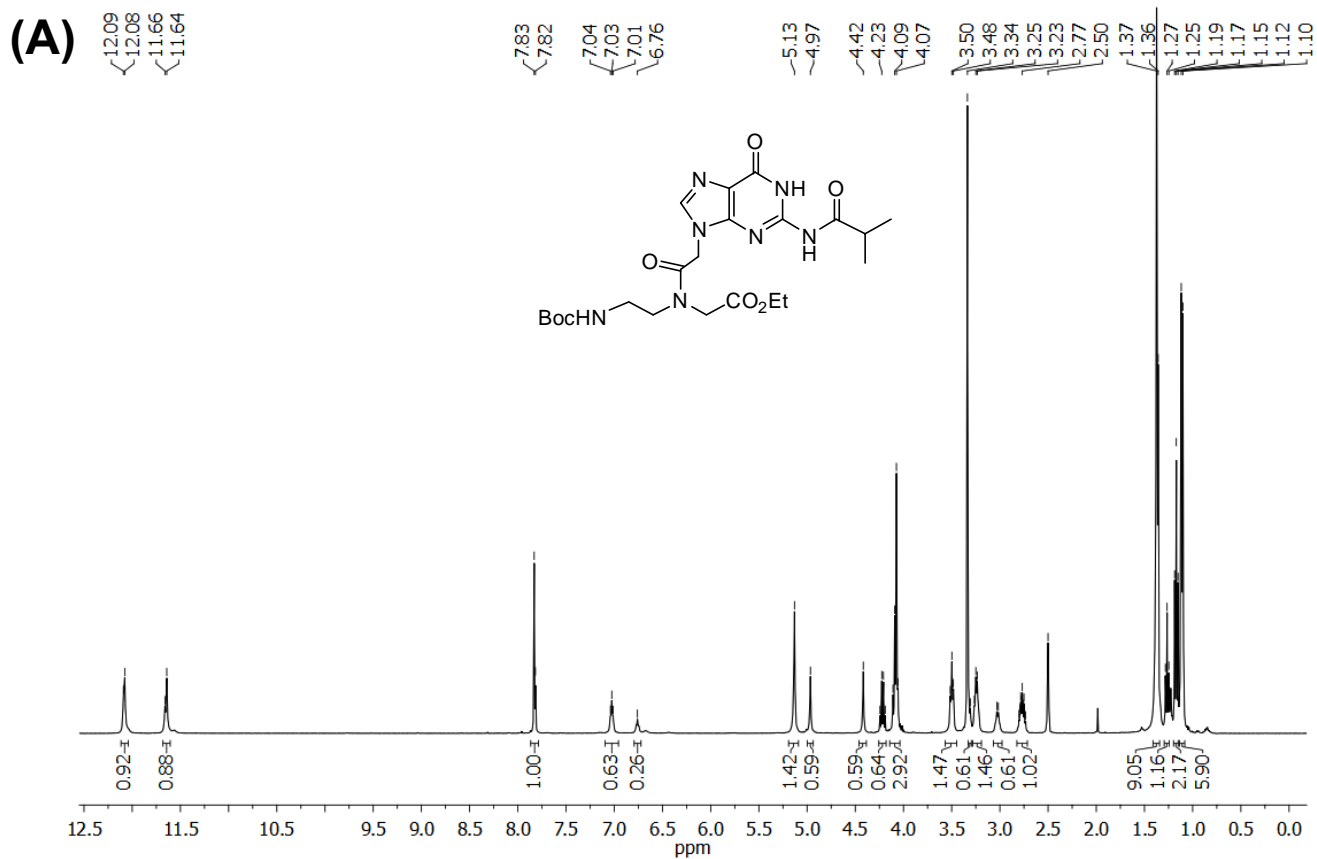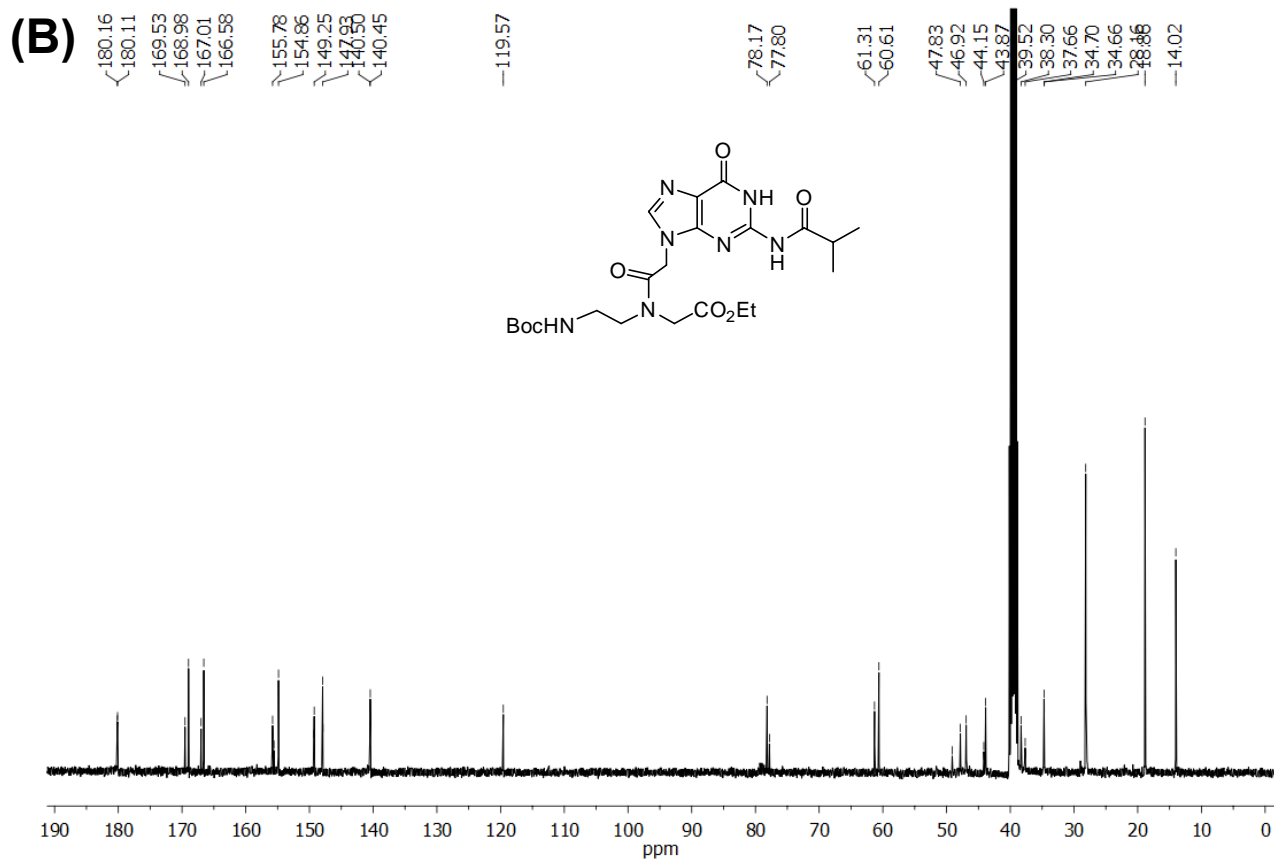

**Figure S6: (A)  $^1\text{H}$ -NMR and (B)  $^{13}\text{C}$ -NMR spectra of 6S**

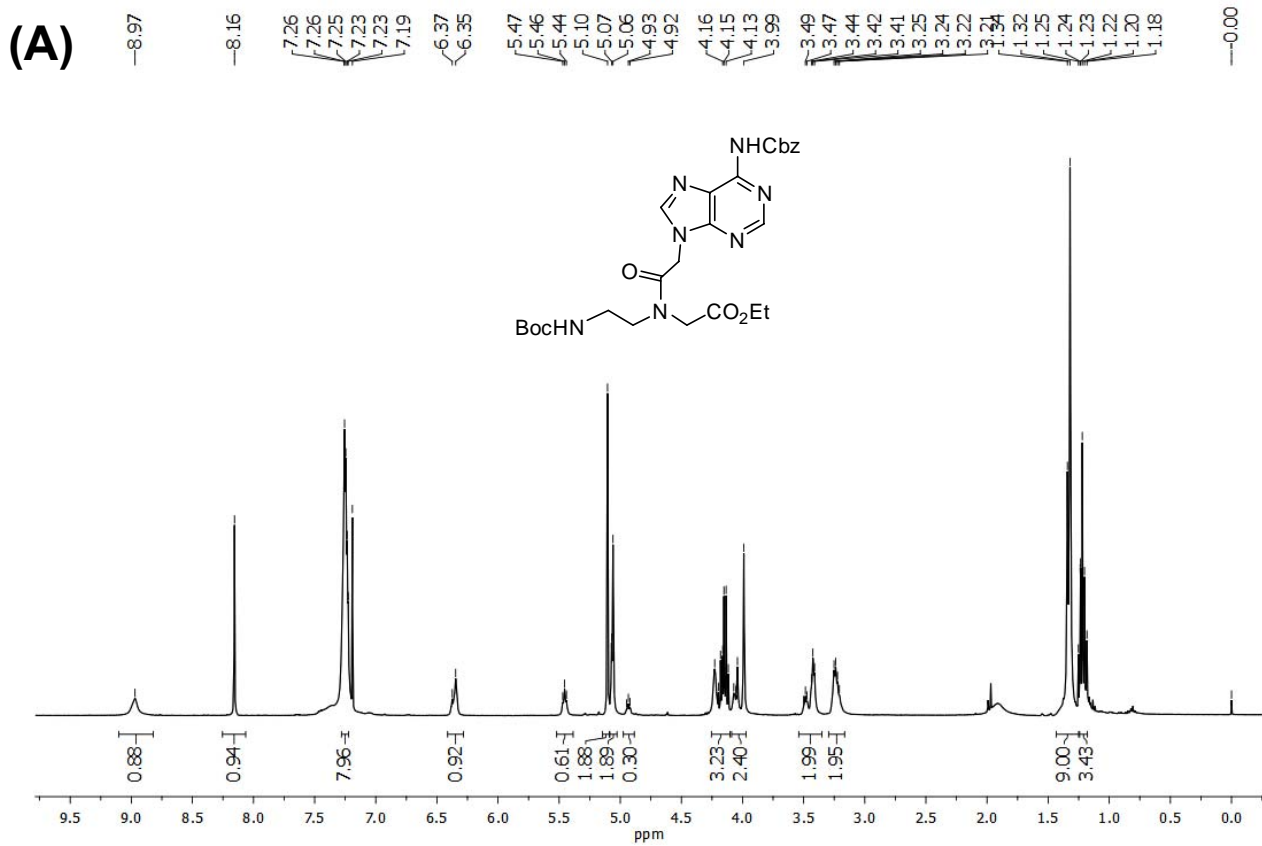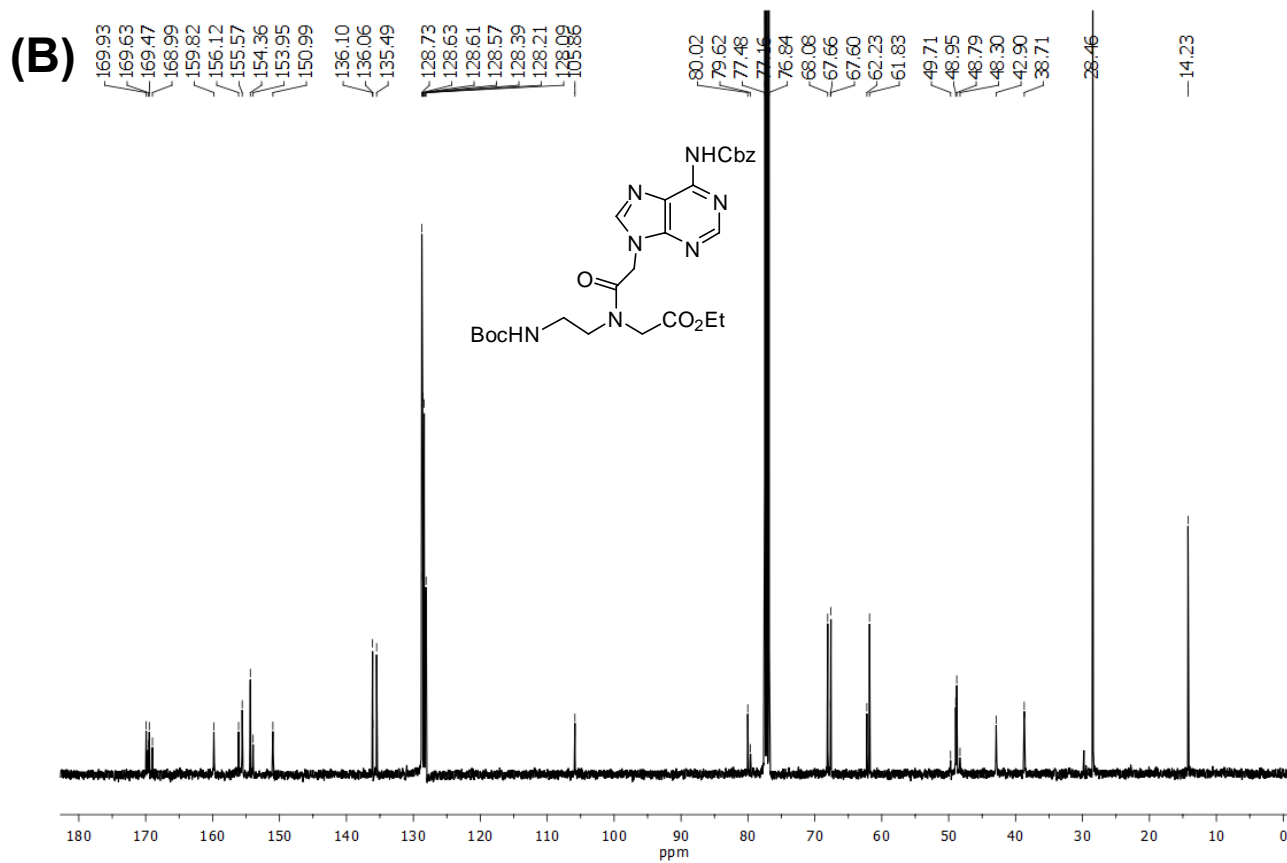

Figure S7: (A)  $^1\text{H-NMR}$  and (B)  $^{13}\text{C-NMR}$  spectra of 7S

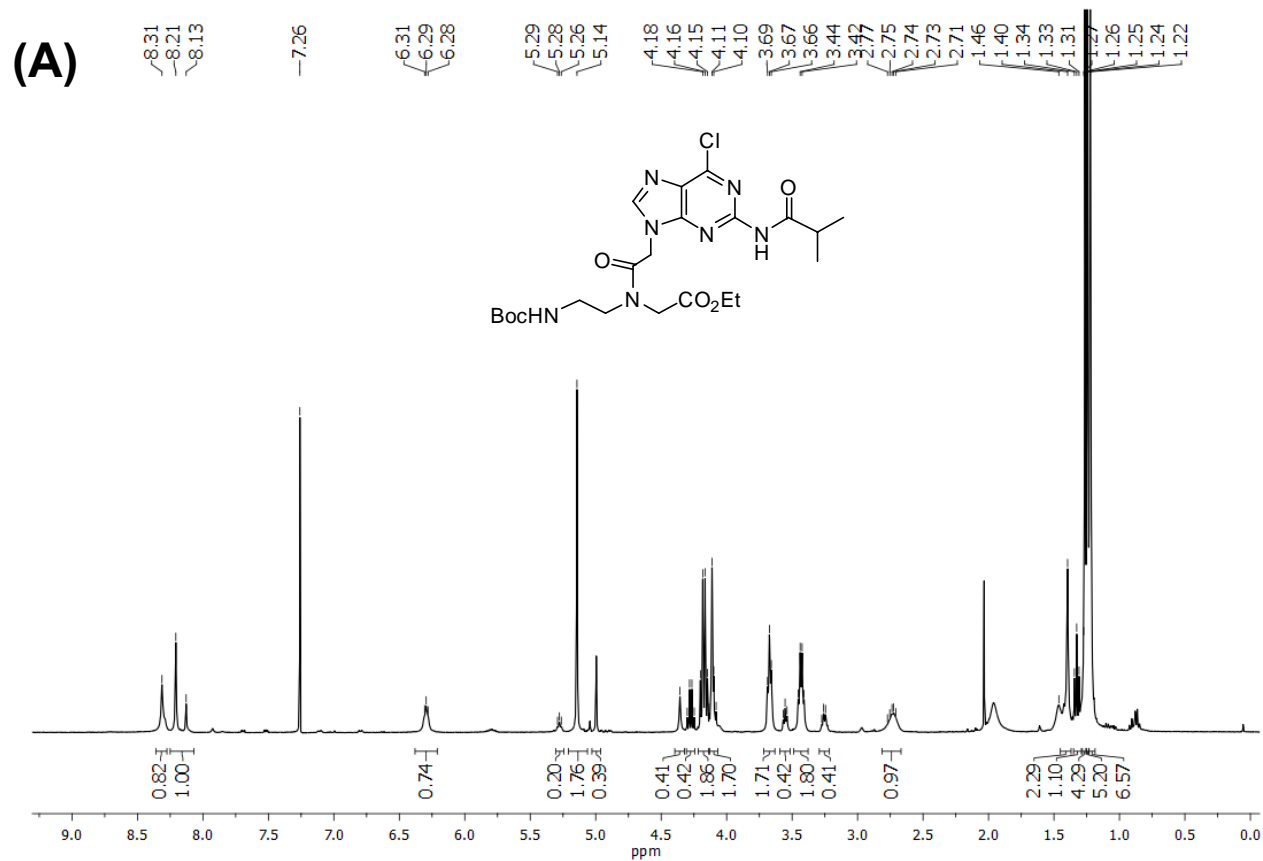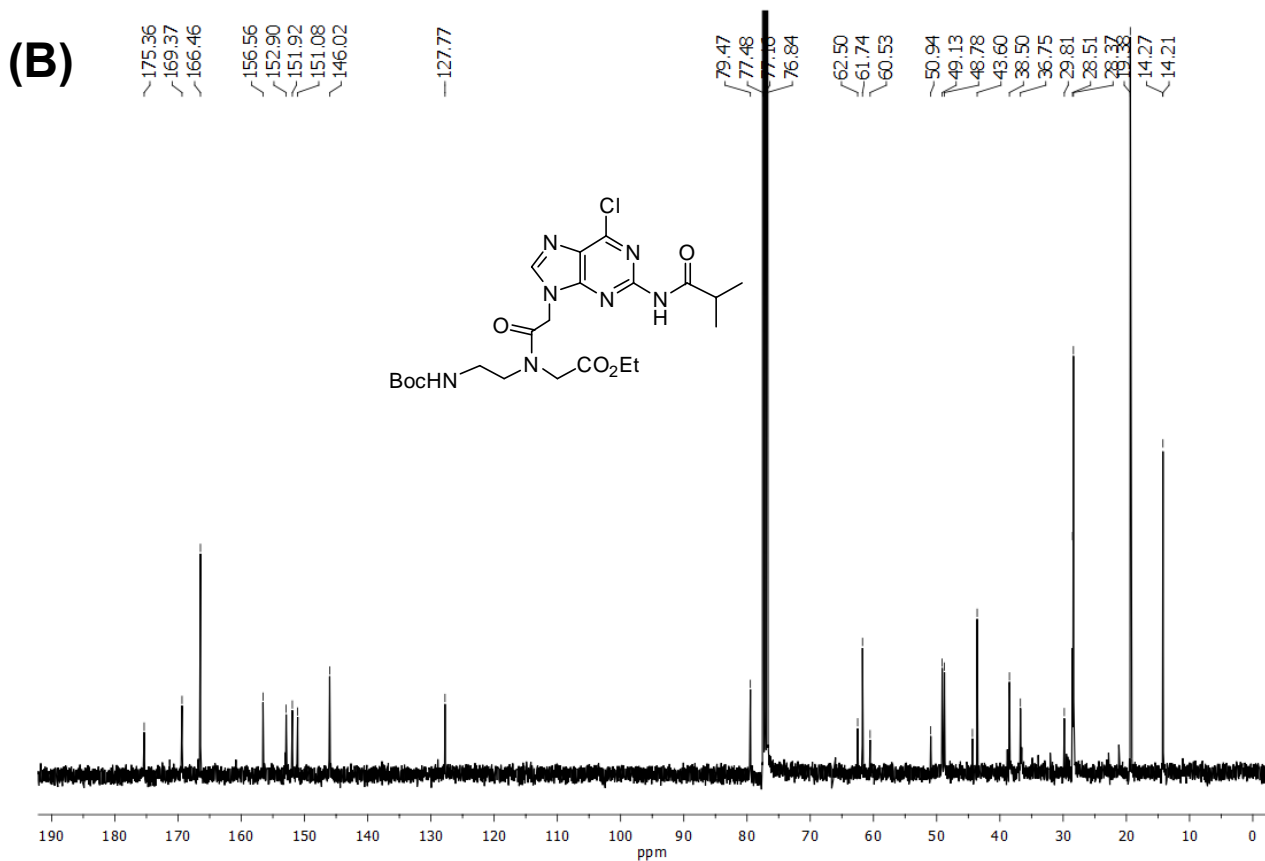

**Figure S8:** (A)  $^1\text{H-NMR}$  and (B)  $^{13}\text{C-NMR}$  spectra of 8S

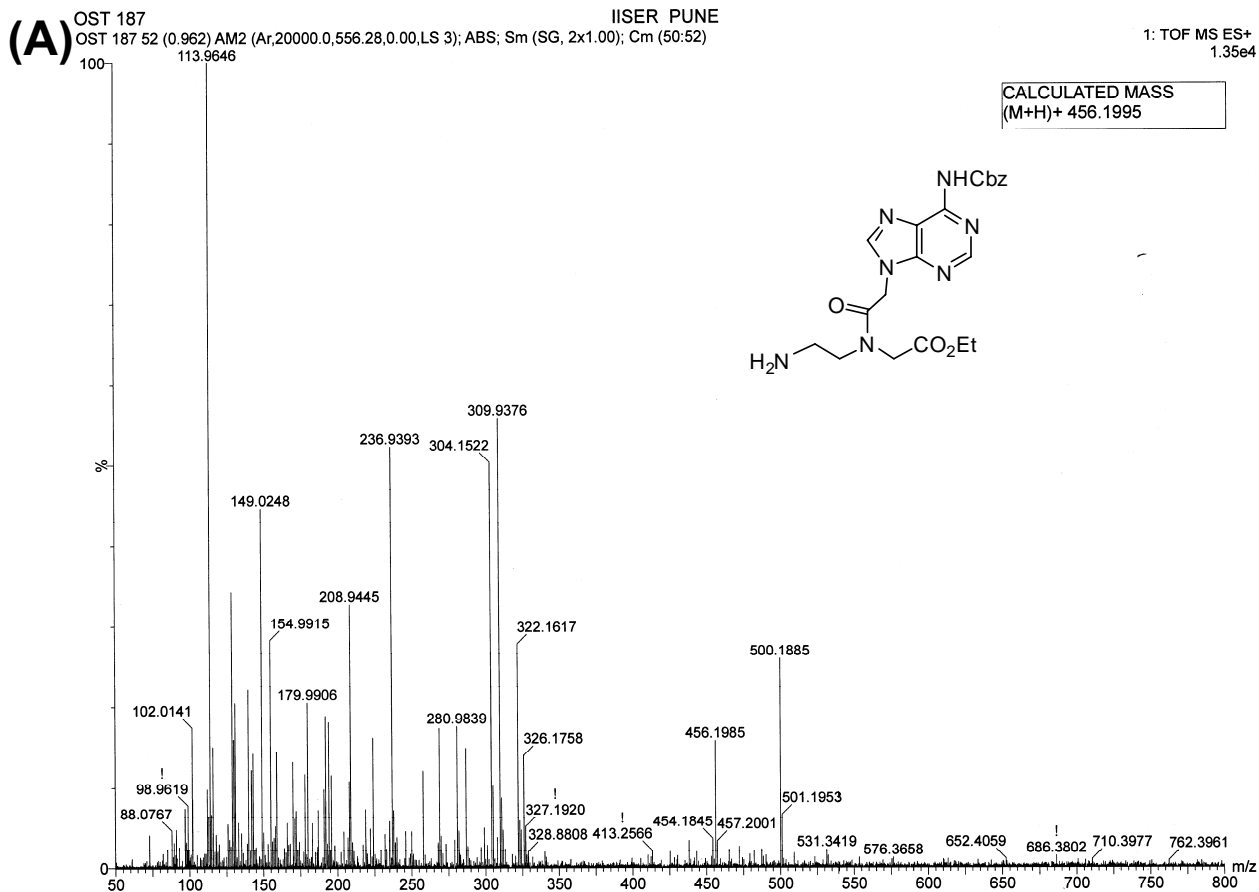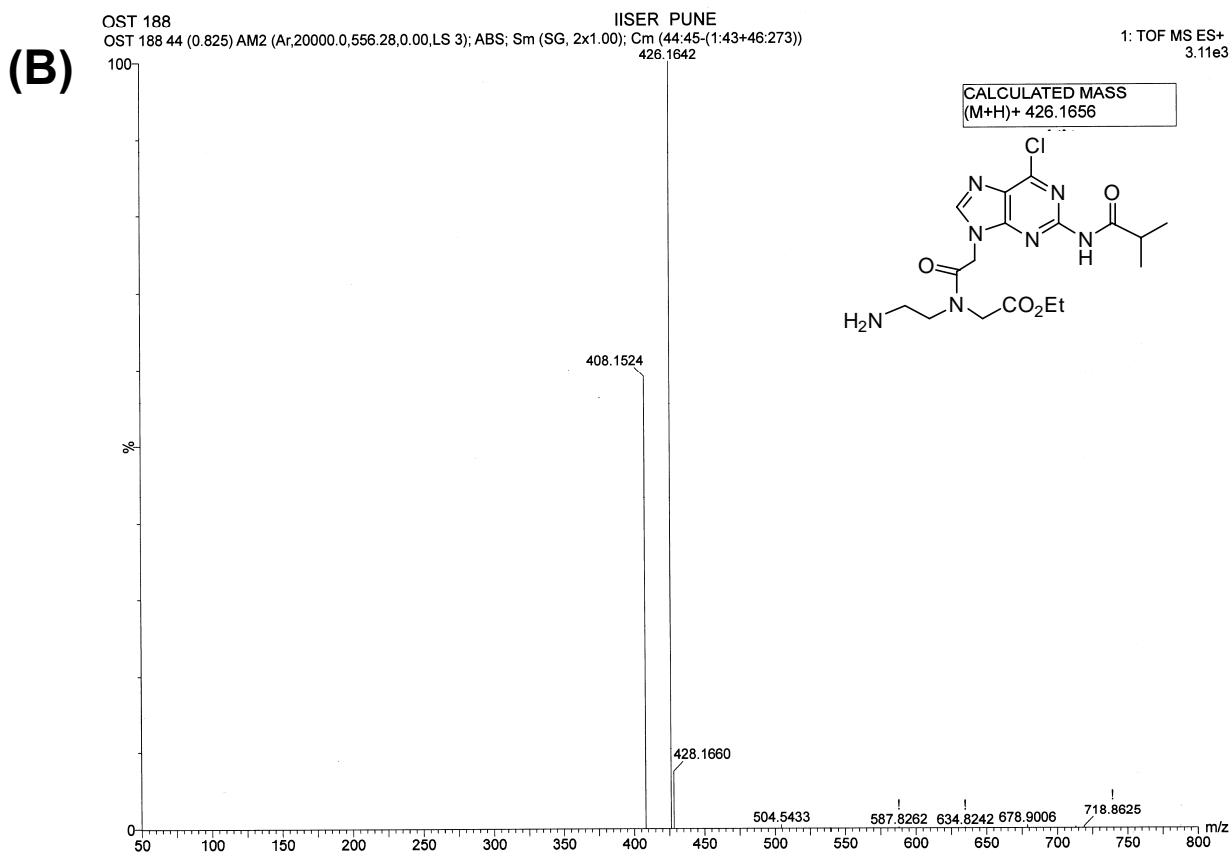

Figure S9: HRMS of crude intermediates (A) 2a and (B) 2b

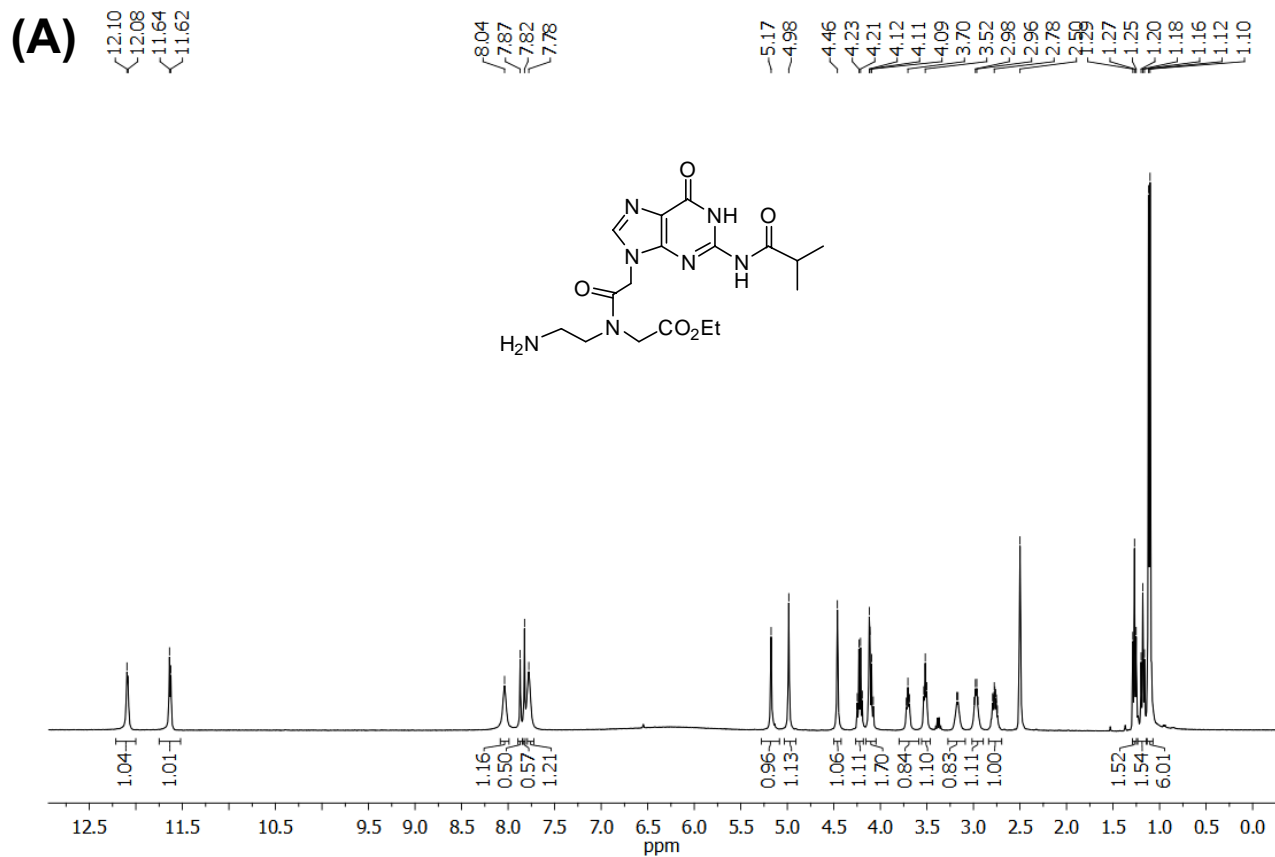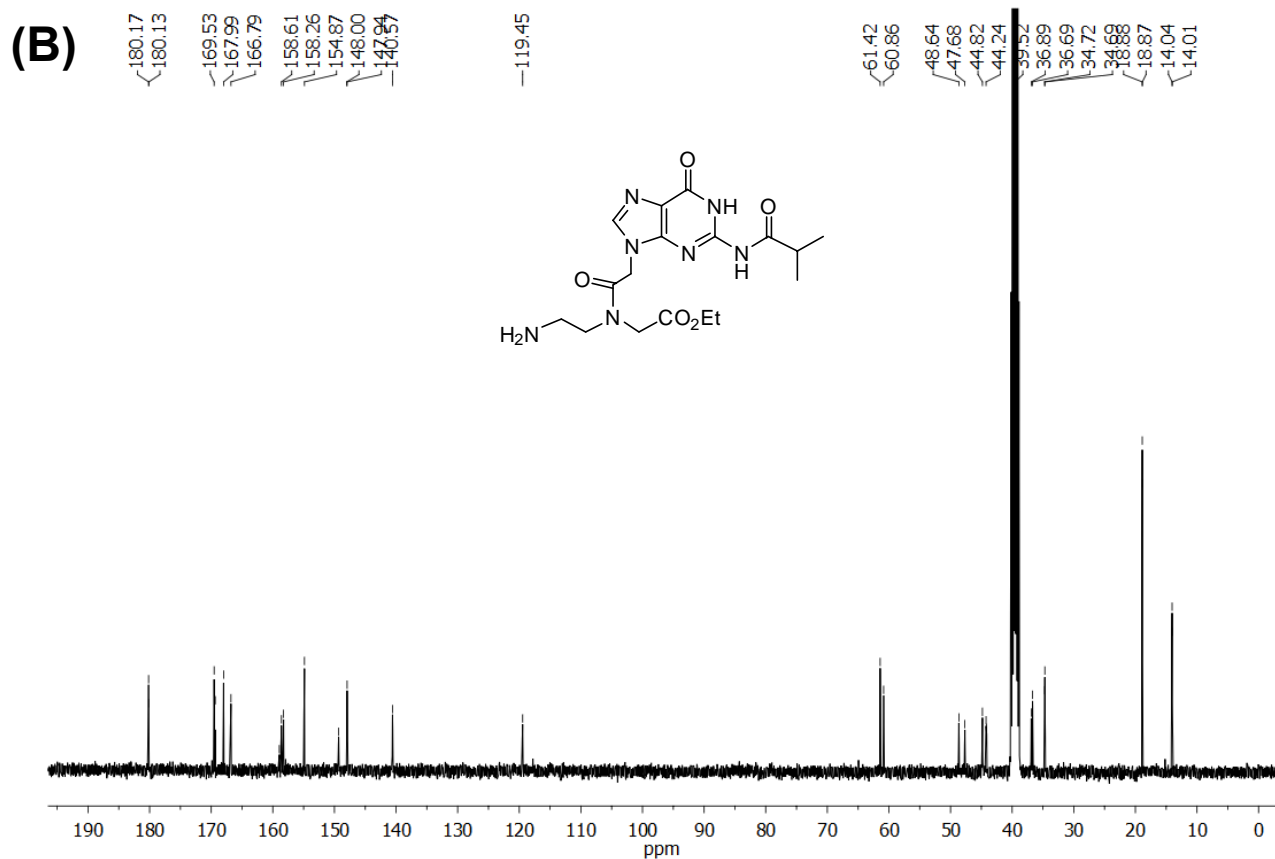

**Figure S10:** (A) <sup>1</sup>H-NMR and (B) <sup>13</sup>C-NMR spectra of **2c**

(A)

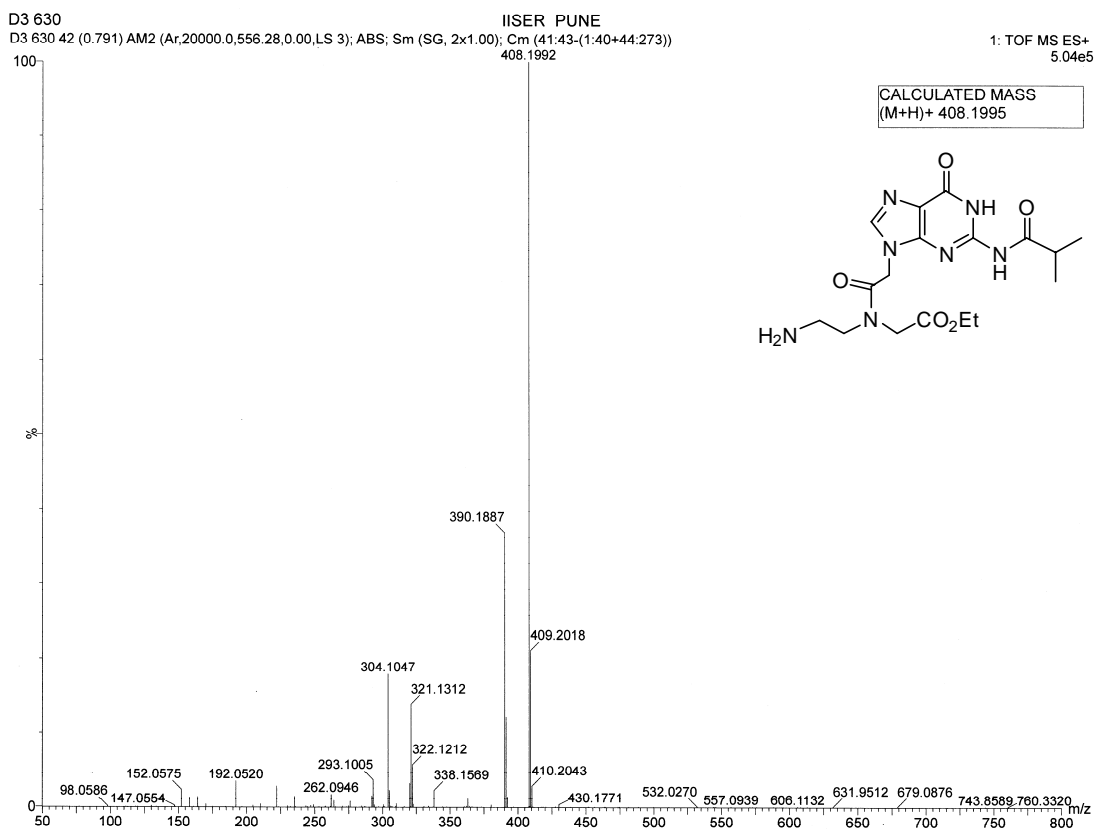

(B)

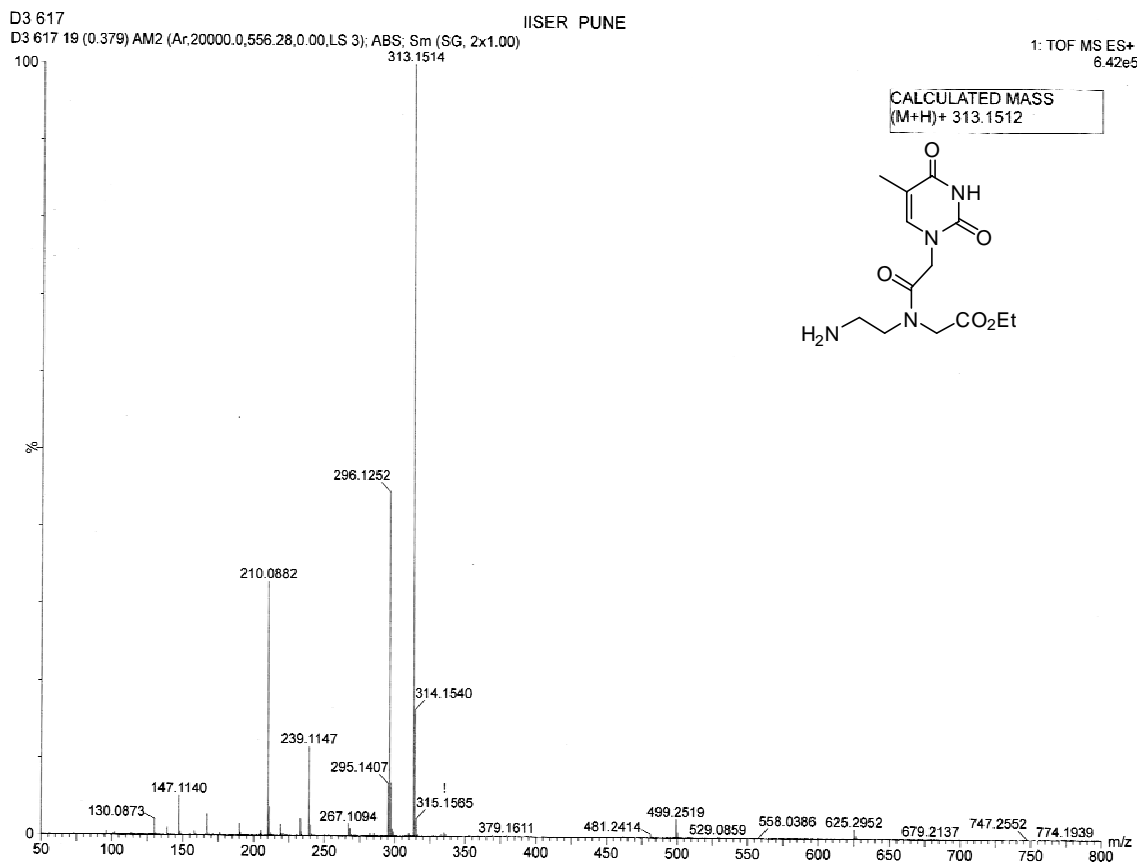

Figure S11: HRMS of intermediates (A) 2c and (B) crude 2d

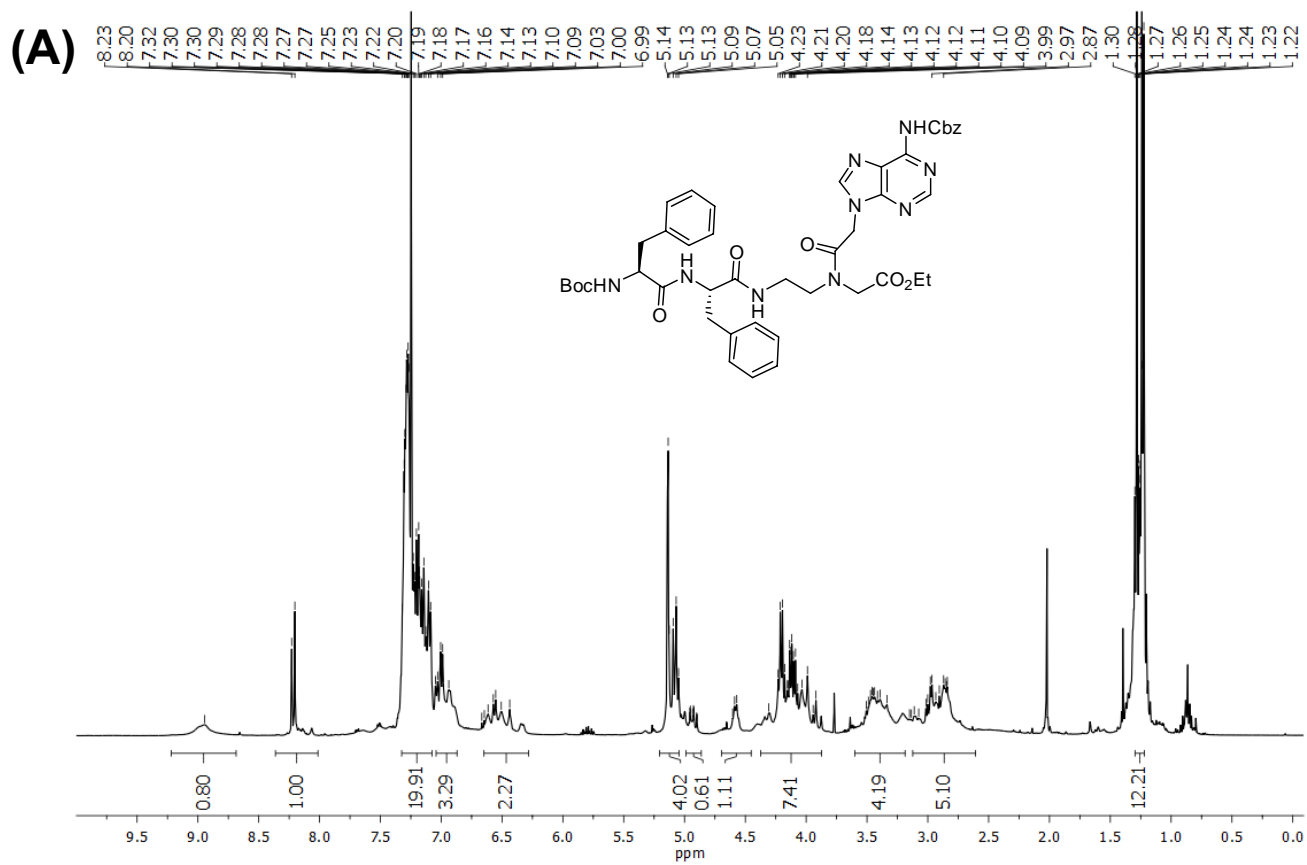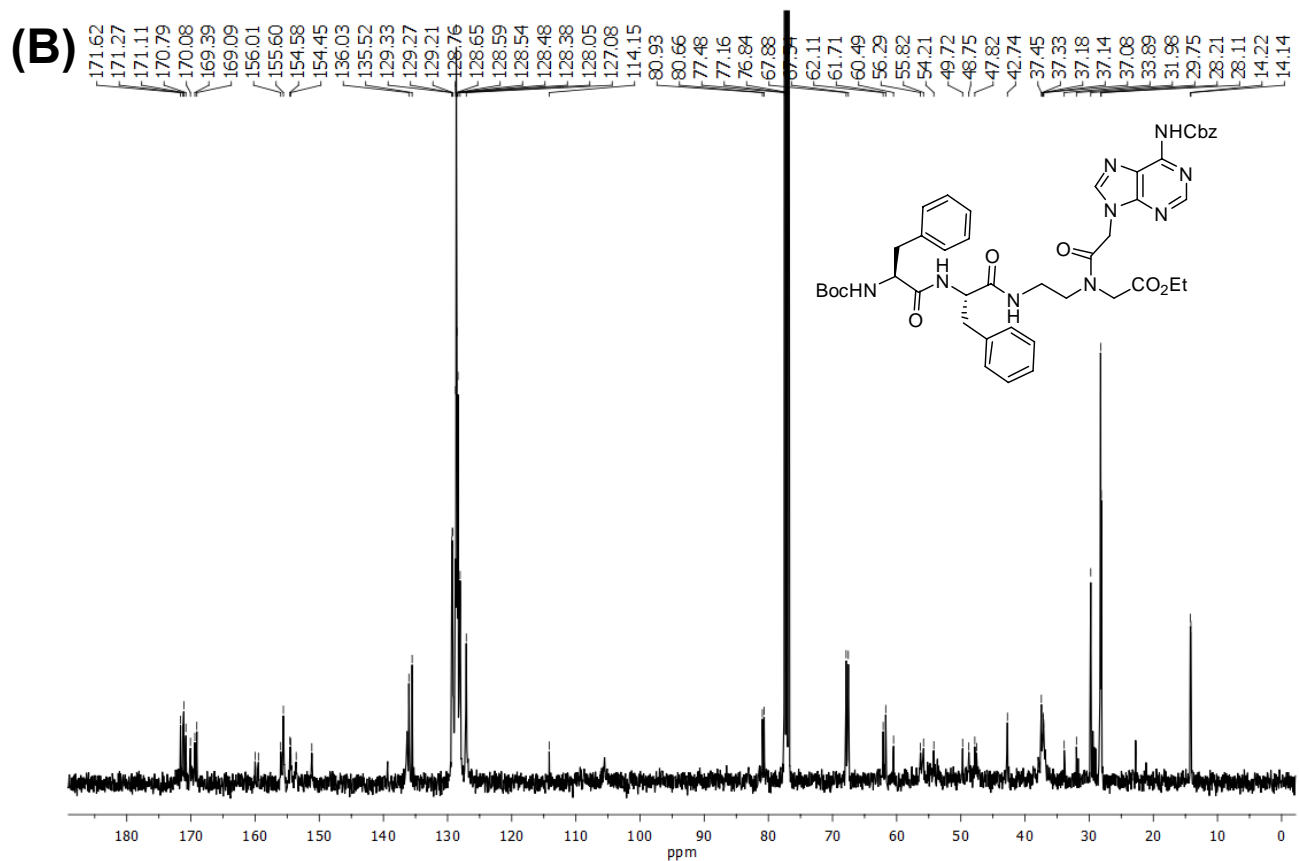

Figure S12: (A)  $^1\text{H-NMR}$  and (B)  $^{13}\text{C-NMR}$  spectra of peptide 3a

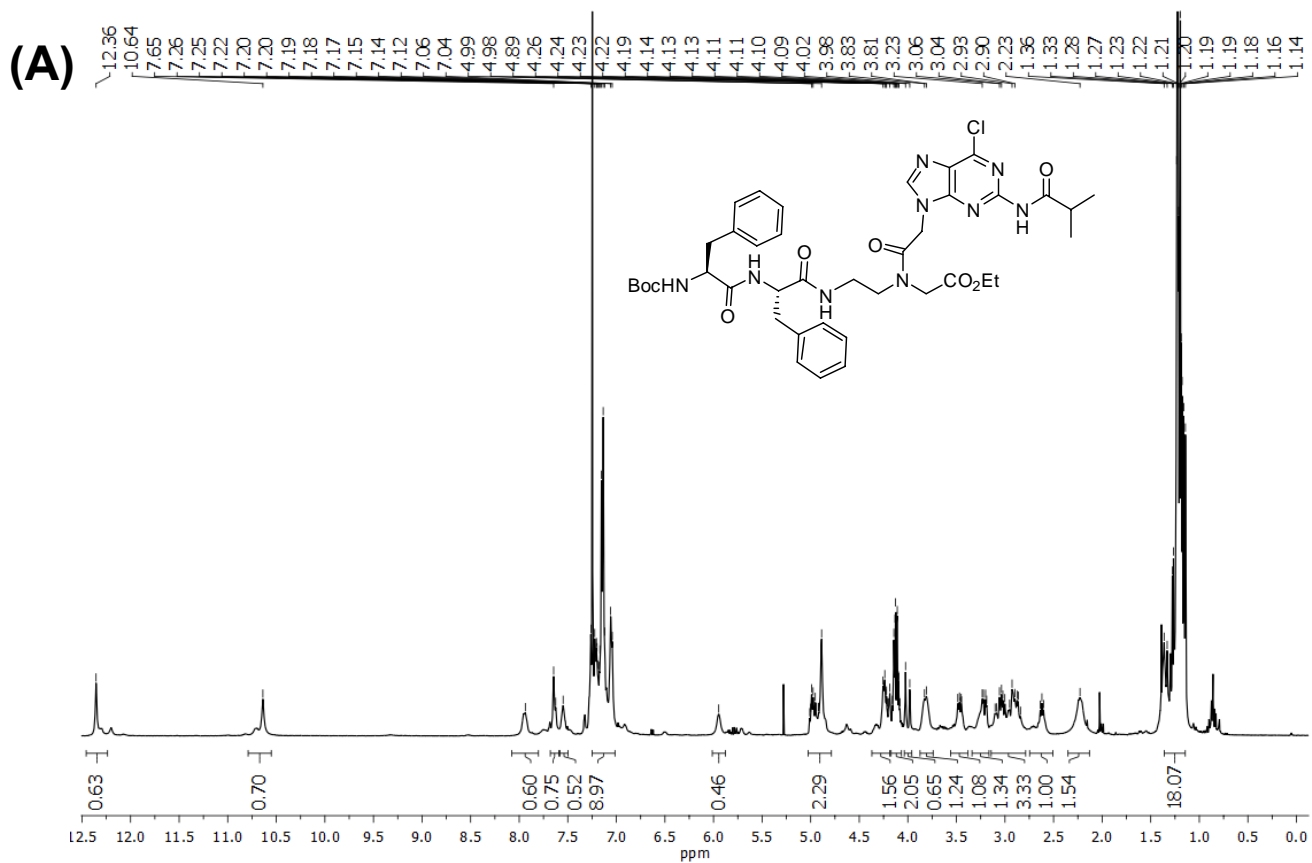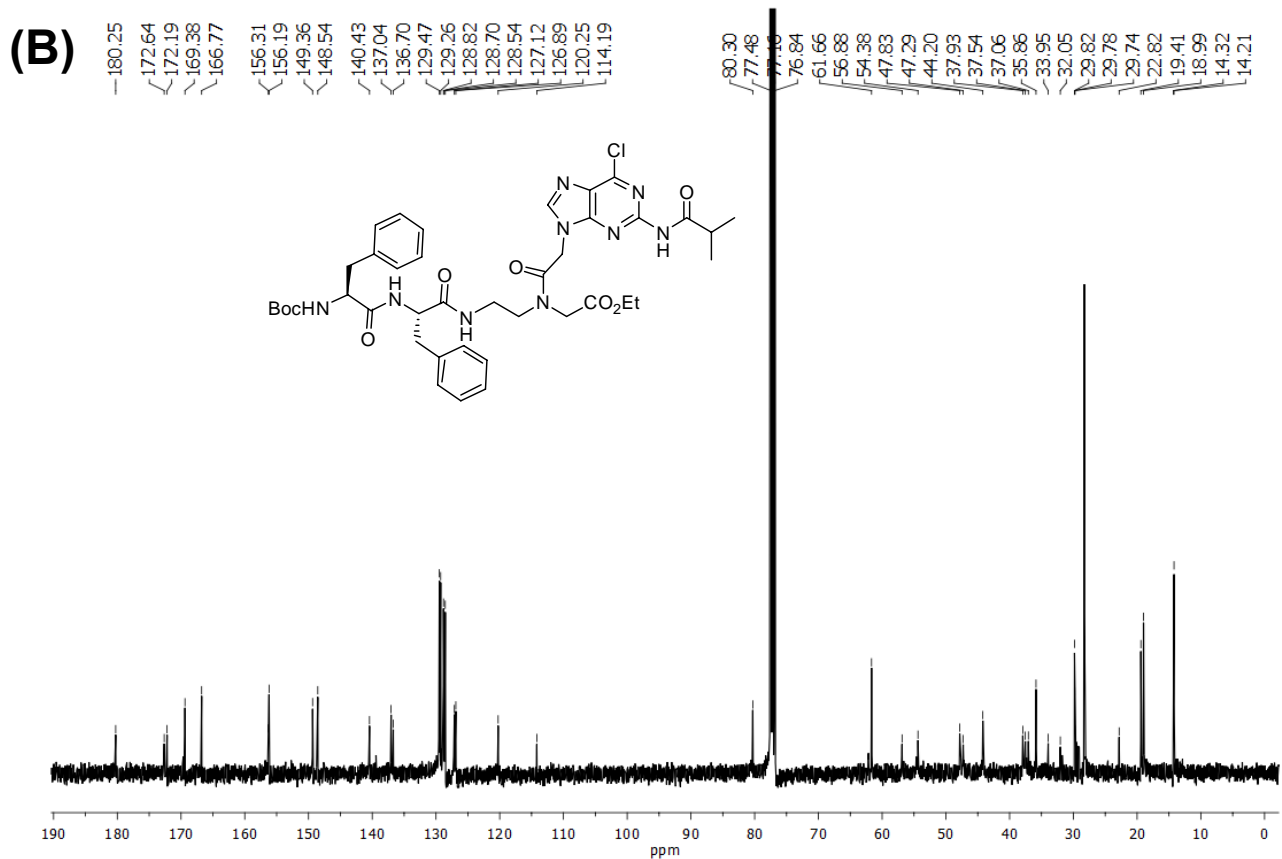

Figure S13: (A)  $^1\text{H}$ -NMR and (B)  $^{13}\text{C}$ -NMR spectra of peptide **3b**



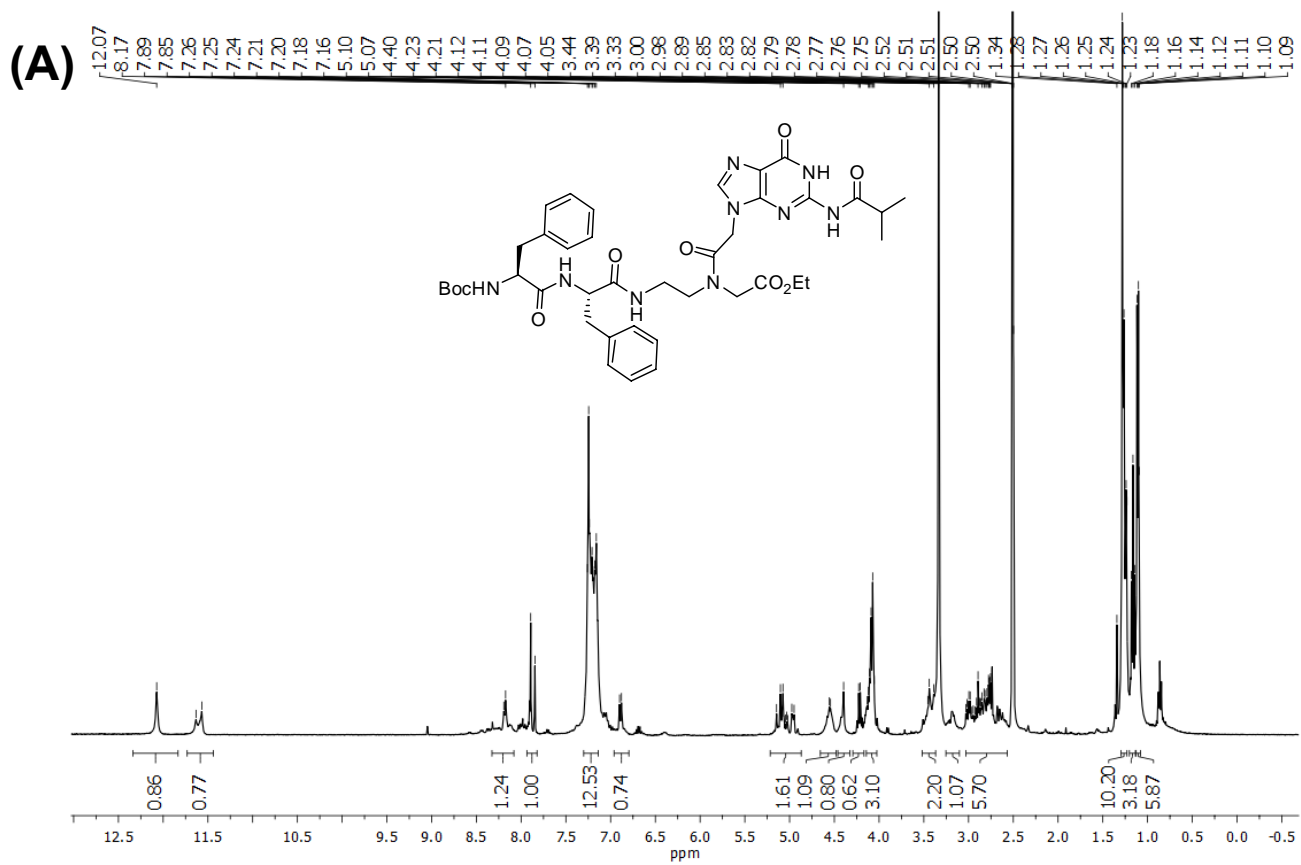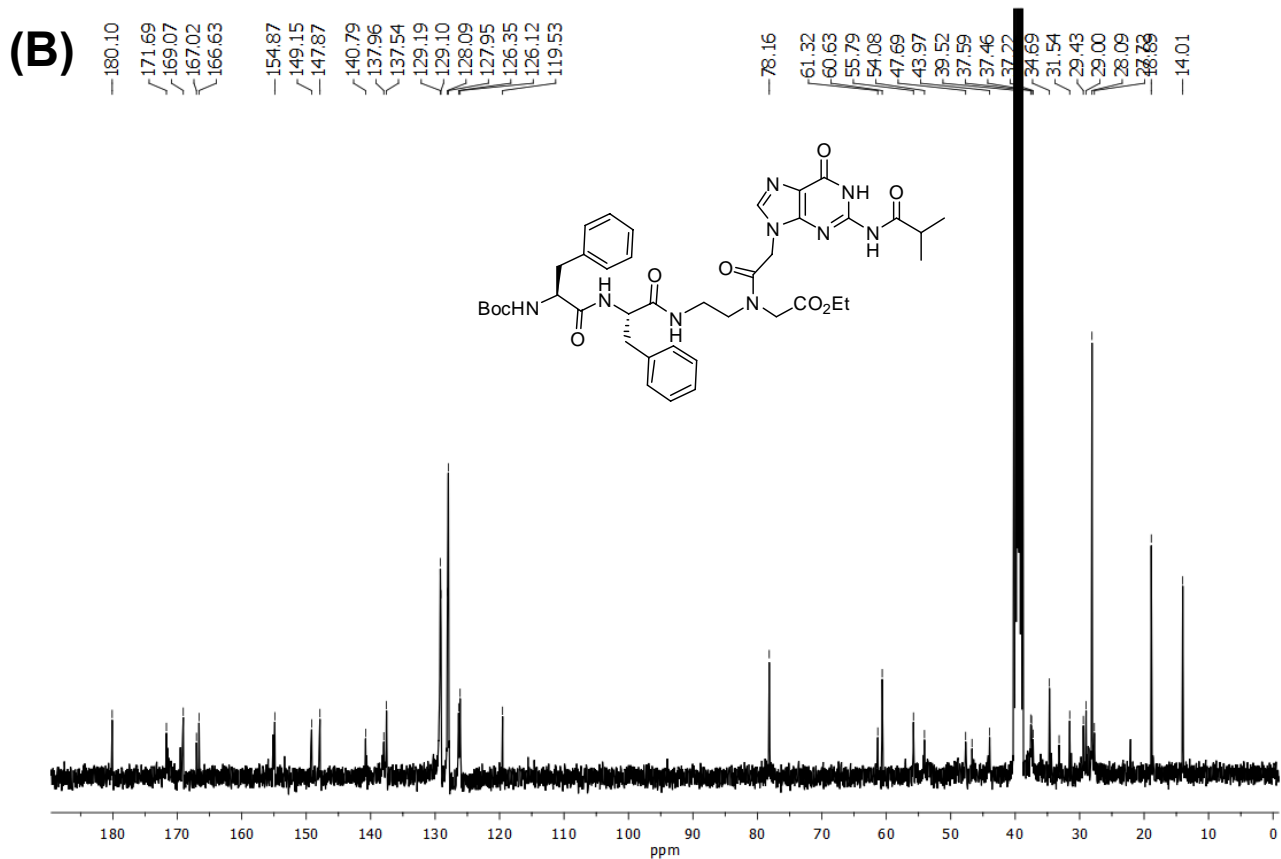

Figure S14: (A)  $^1\text{H-NMR}$  and (B)  $^{13}\text{C-NMR}$  spectra of peptide 3c

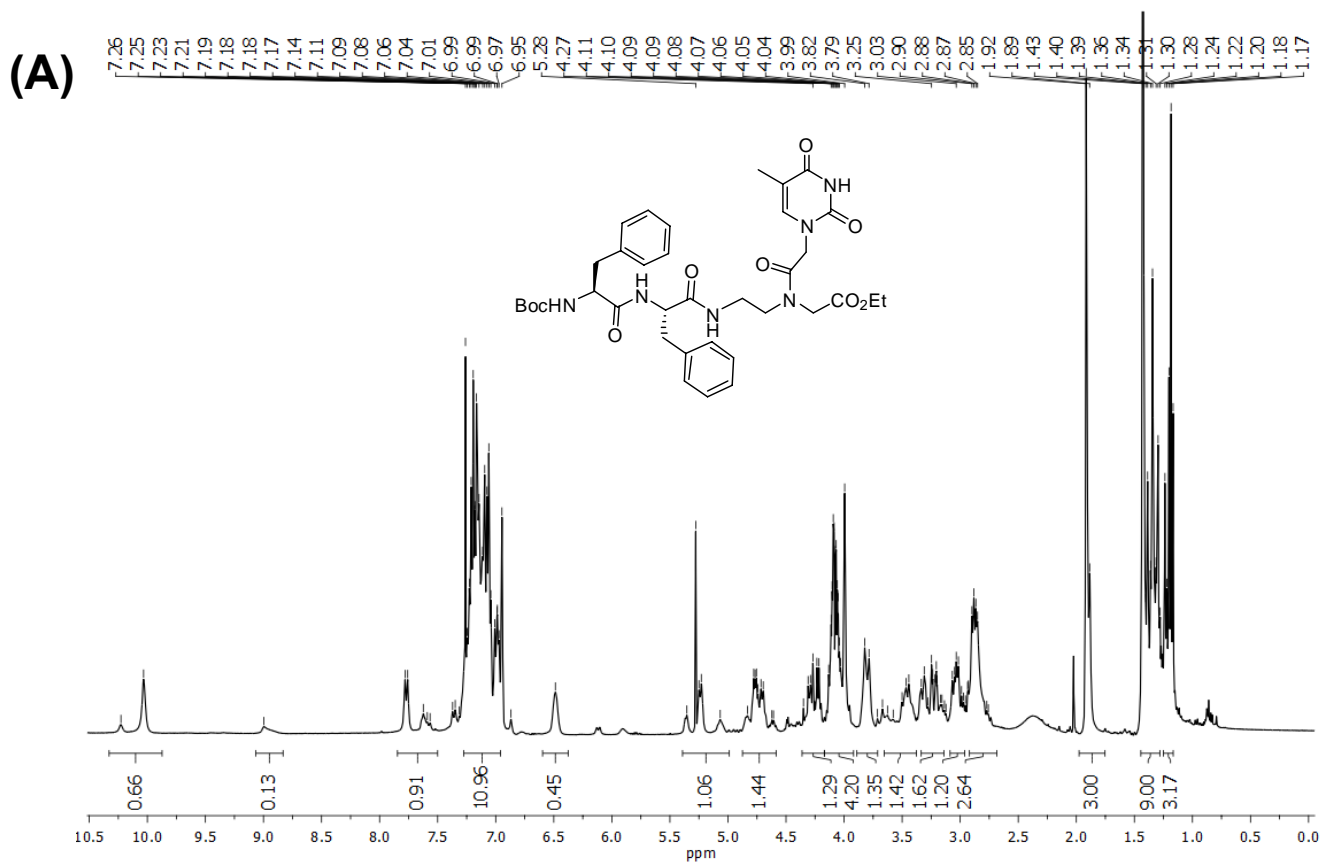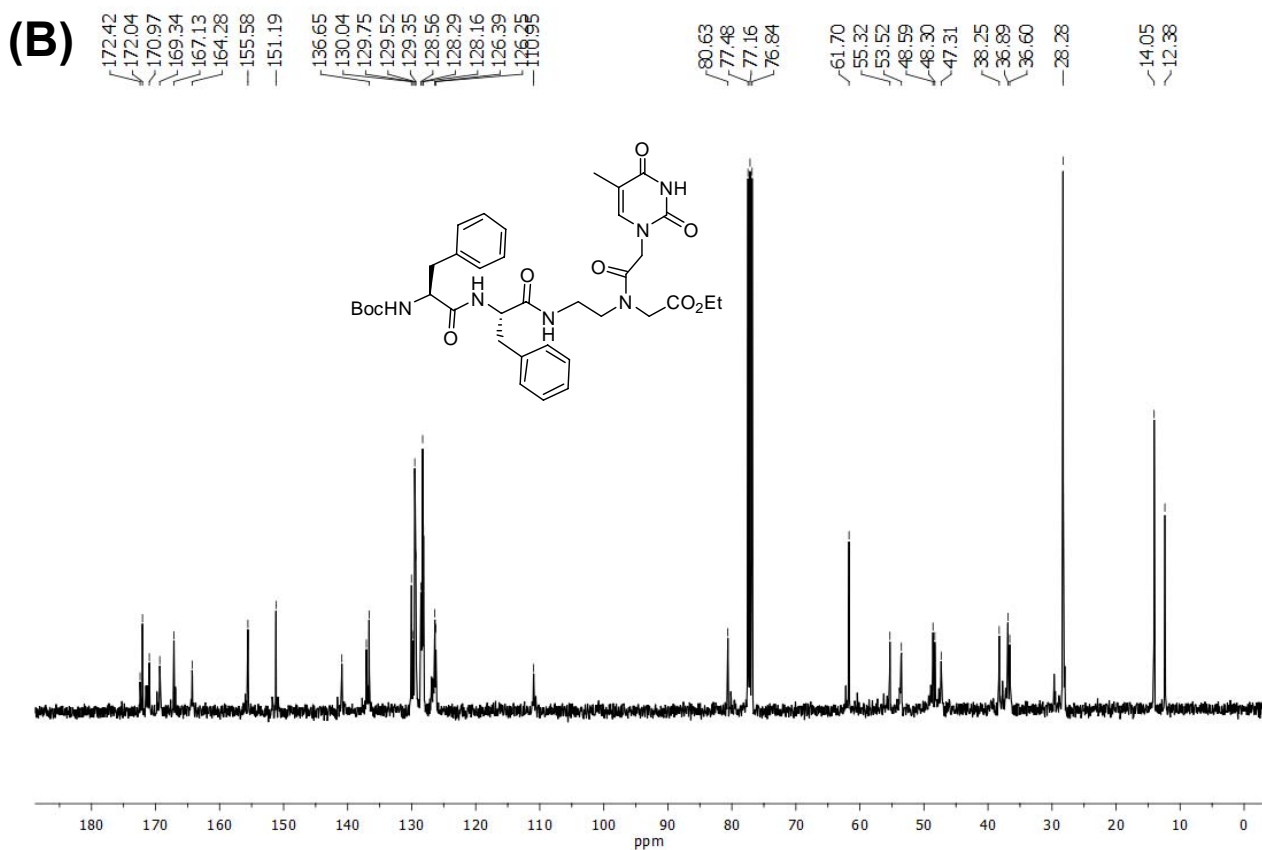

Figure S15: (A)  $^1\text{H-NMR}$  and (B)  $^{13}\text{C-NMR}$  spectra of peptide 3d

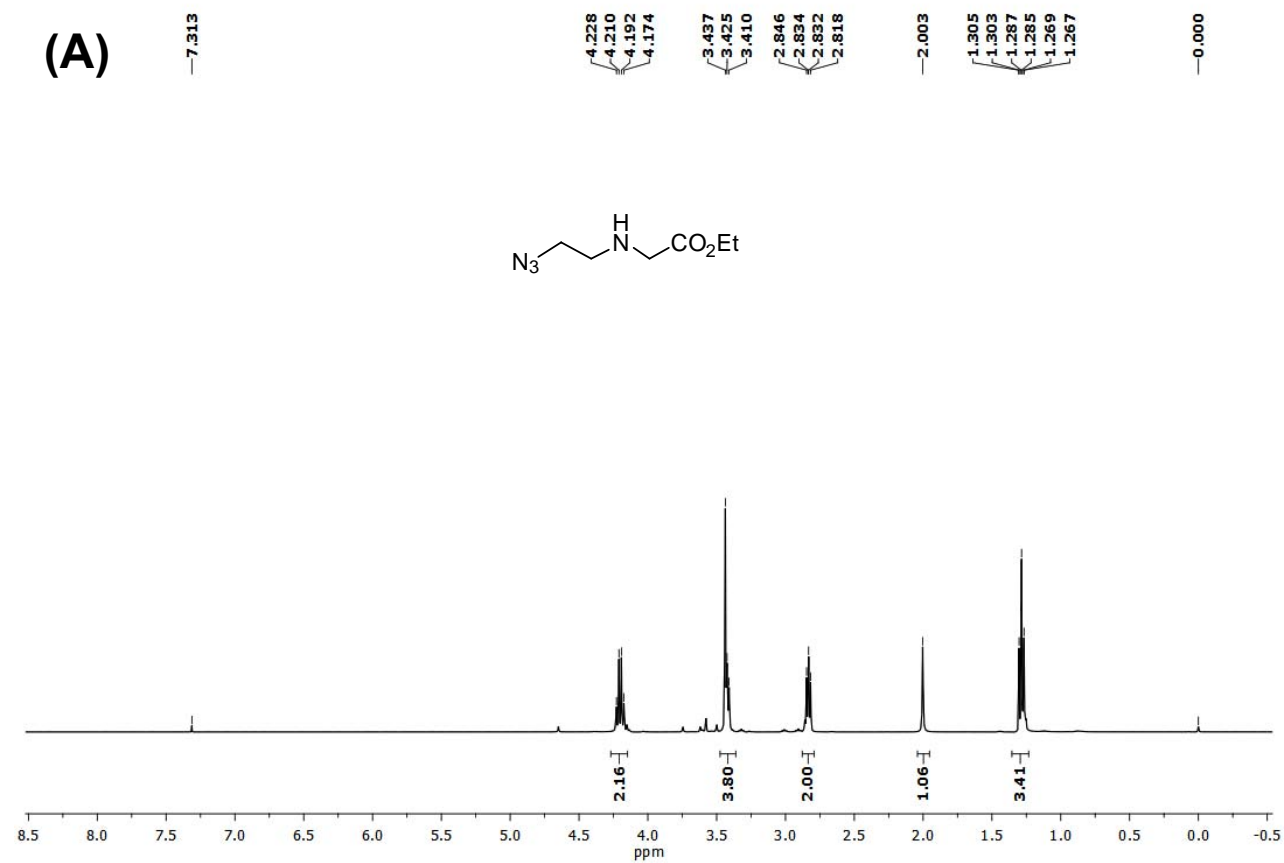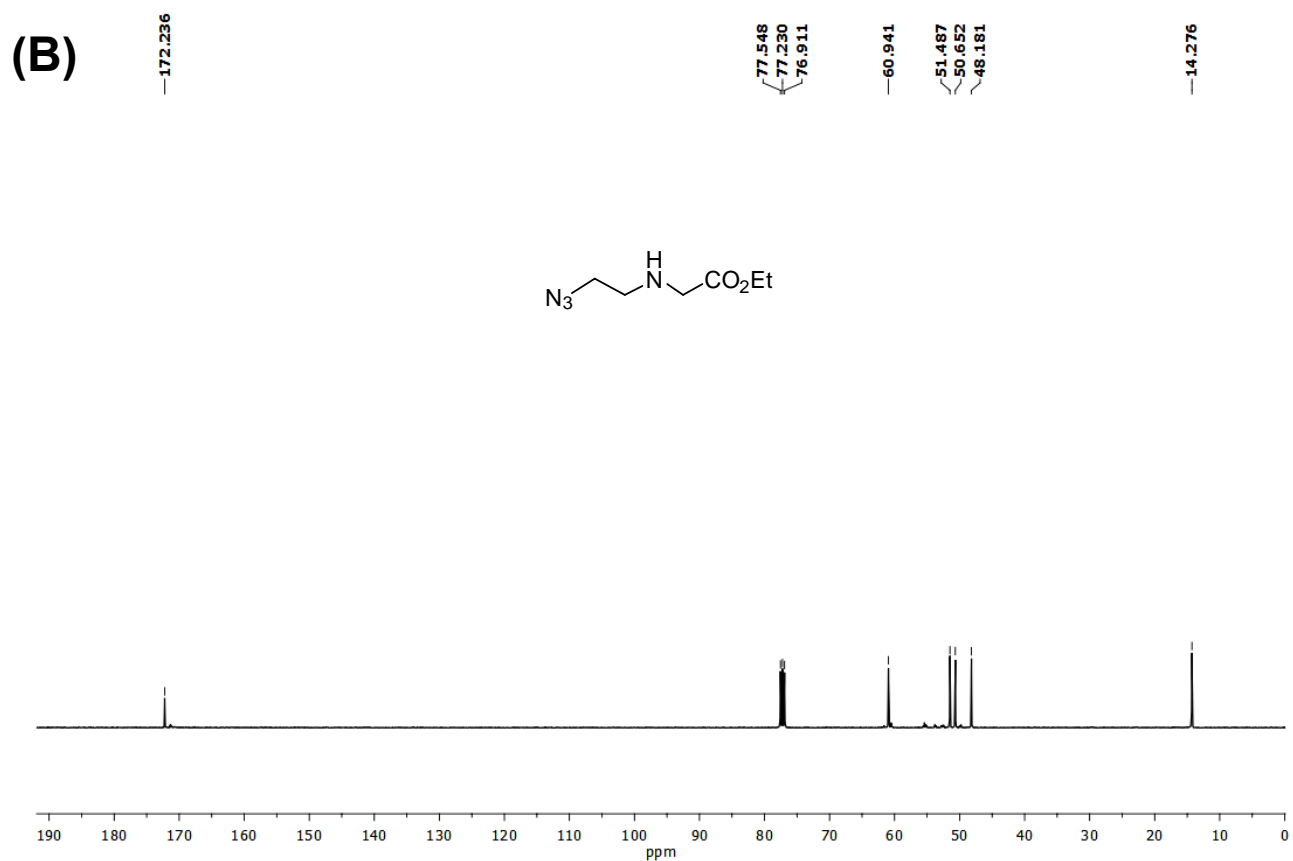

**Figure S16:** (A)  $^1\text{H}$ -NMR and (B)  $^{13}\text{C}$ -NMR spectra of **9S**

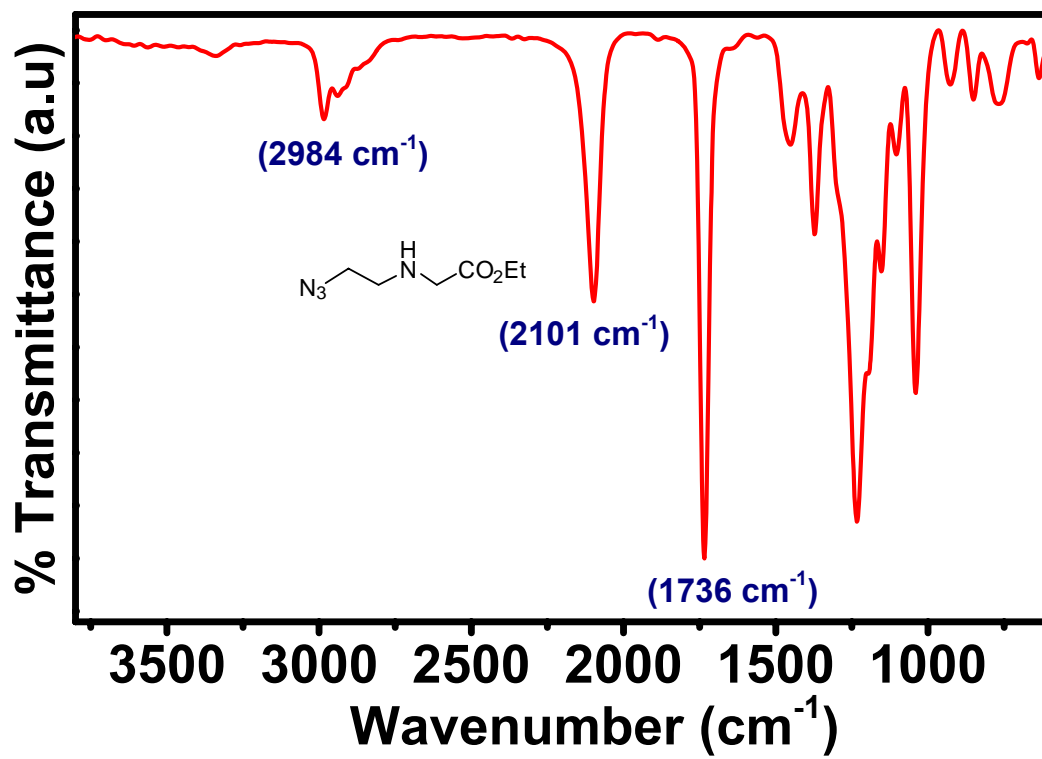

Figure S17: FTIR spectrum of 9S

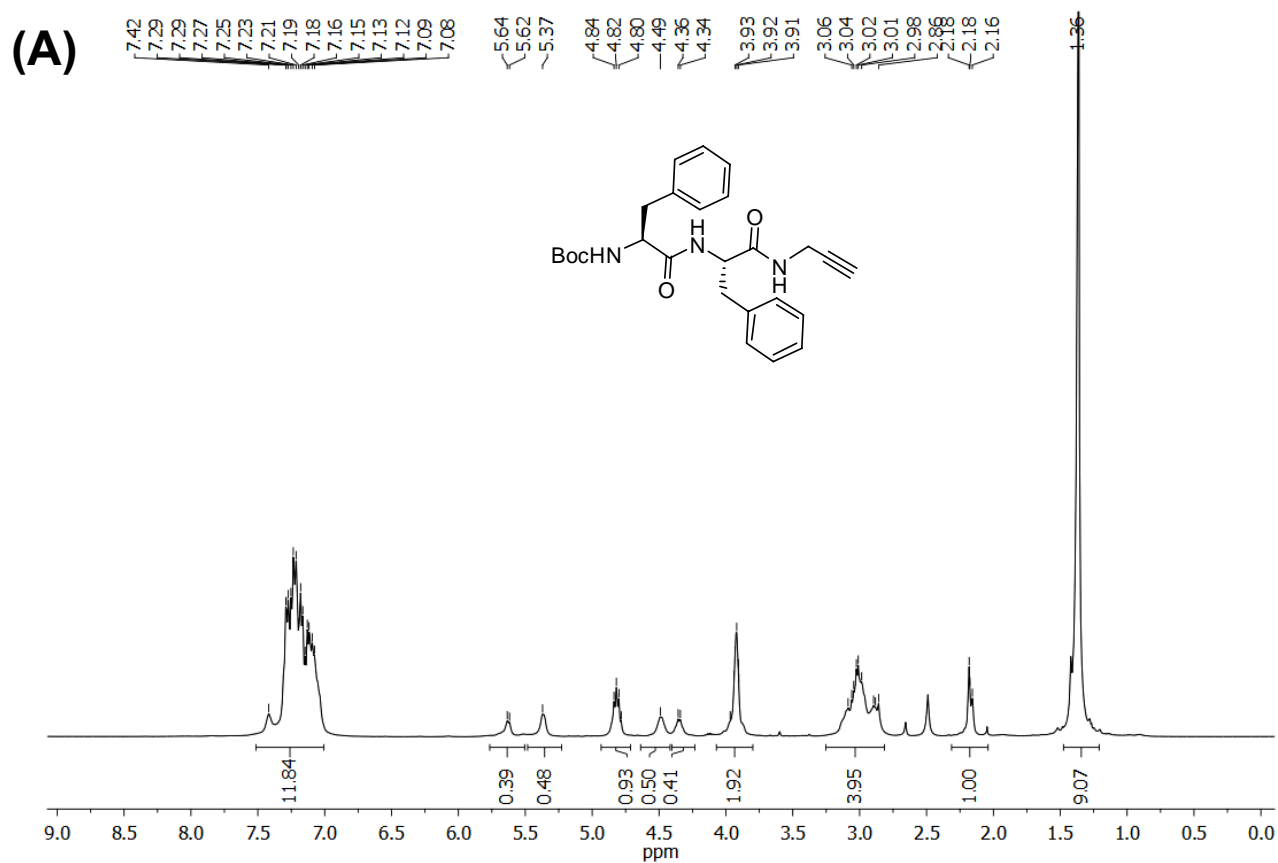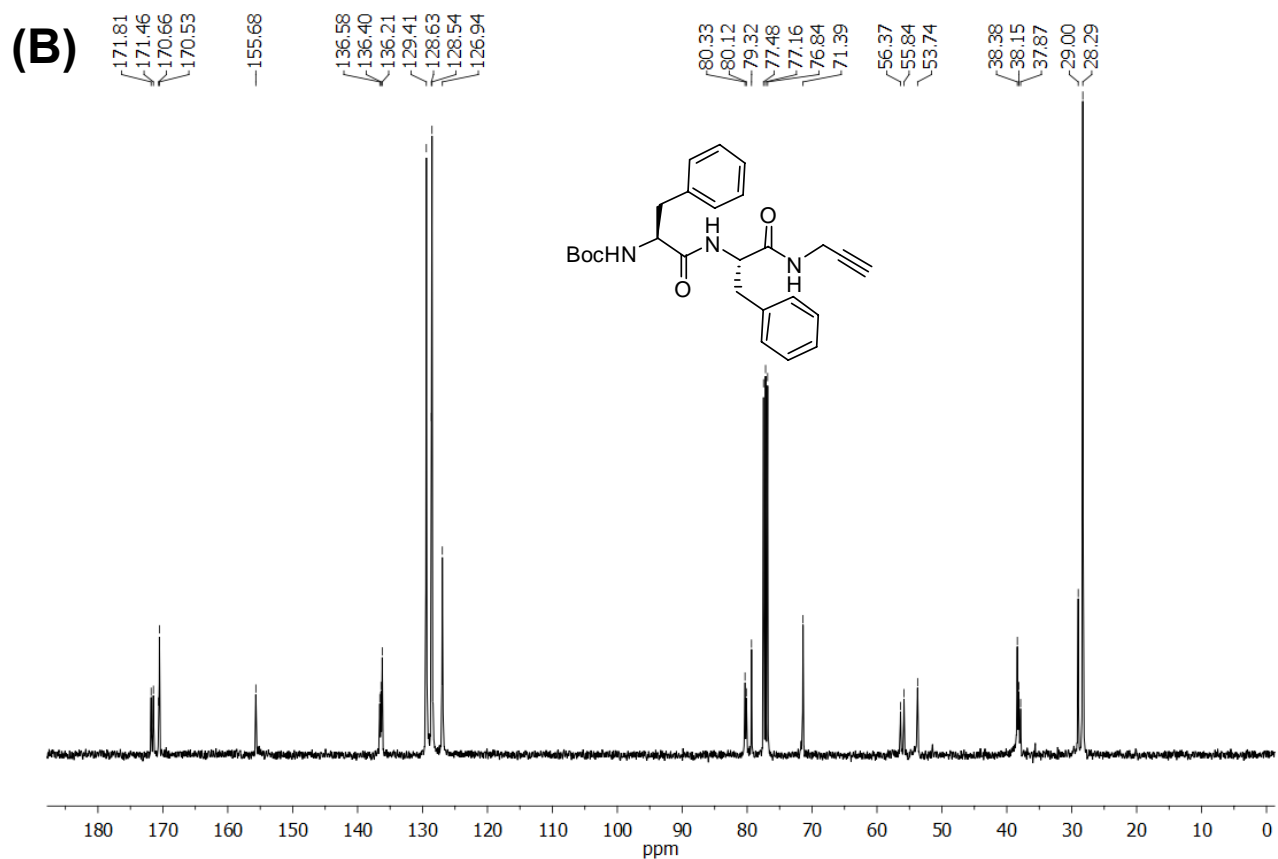

**Figure S18:** (A)  $^1\text{H-NMR}$  and (B)  $^{13}\text{C-NMR}$  spectra of peptide 4

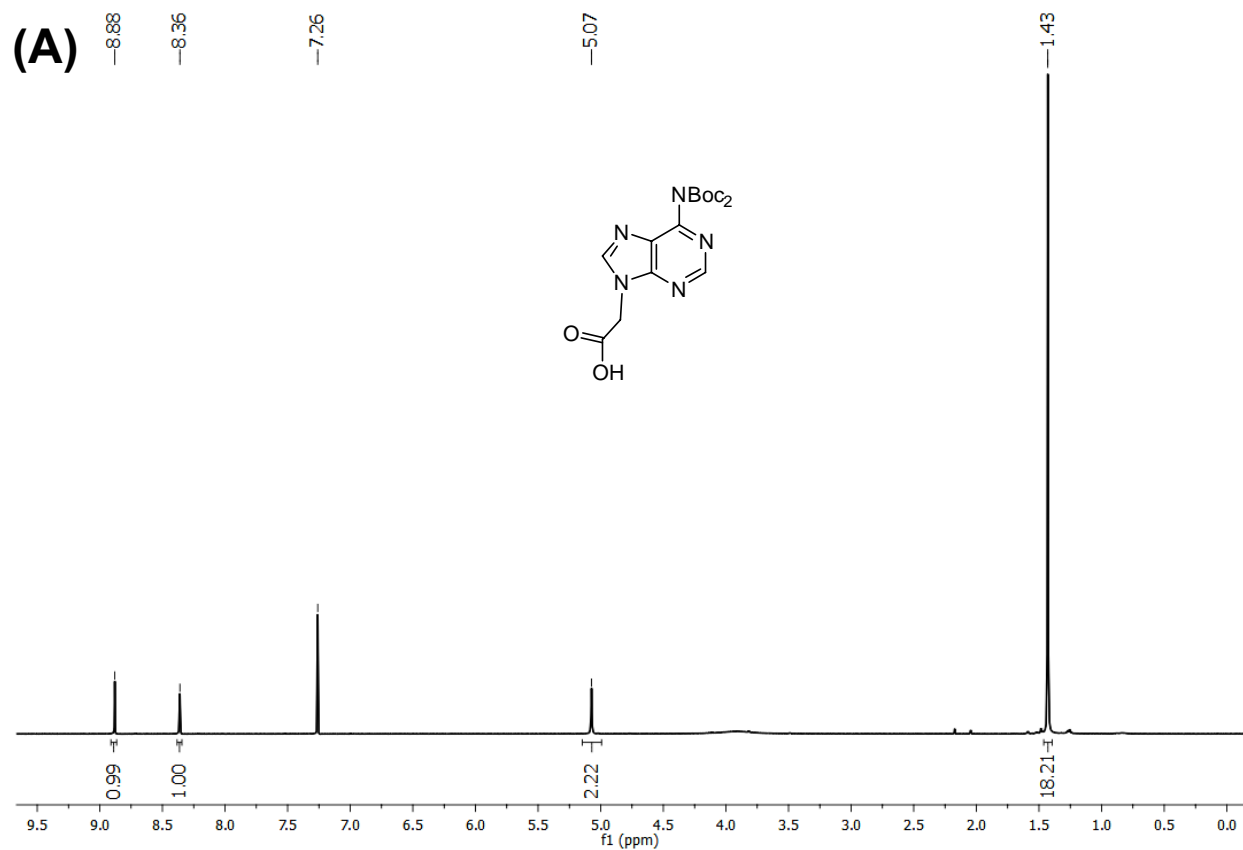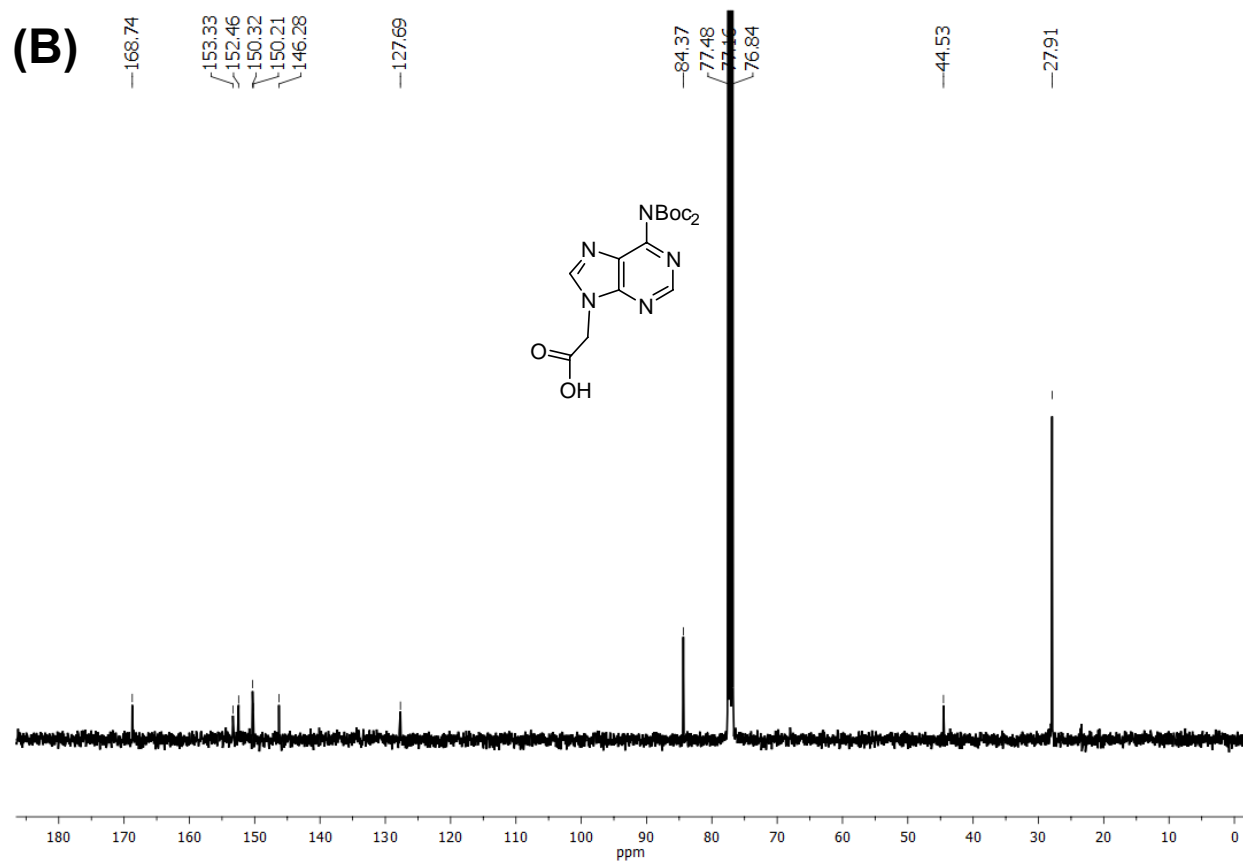

Figure S19: (A)  $^1\text{H}$ -NMR and (B)  $^{13}\text{C}$ -NMR spectra of  $N^{(Boc)_2}-N^9$ -acetic acid

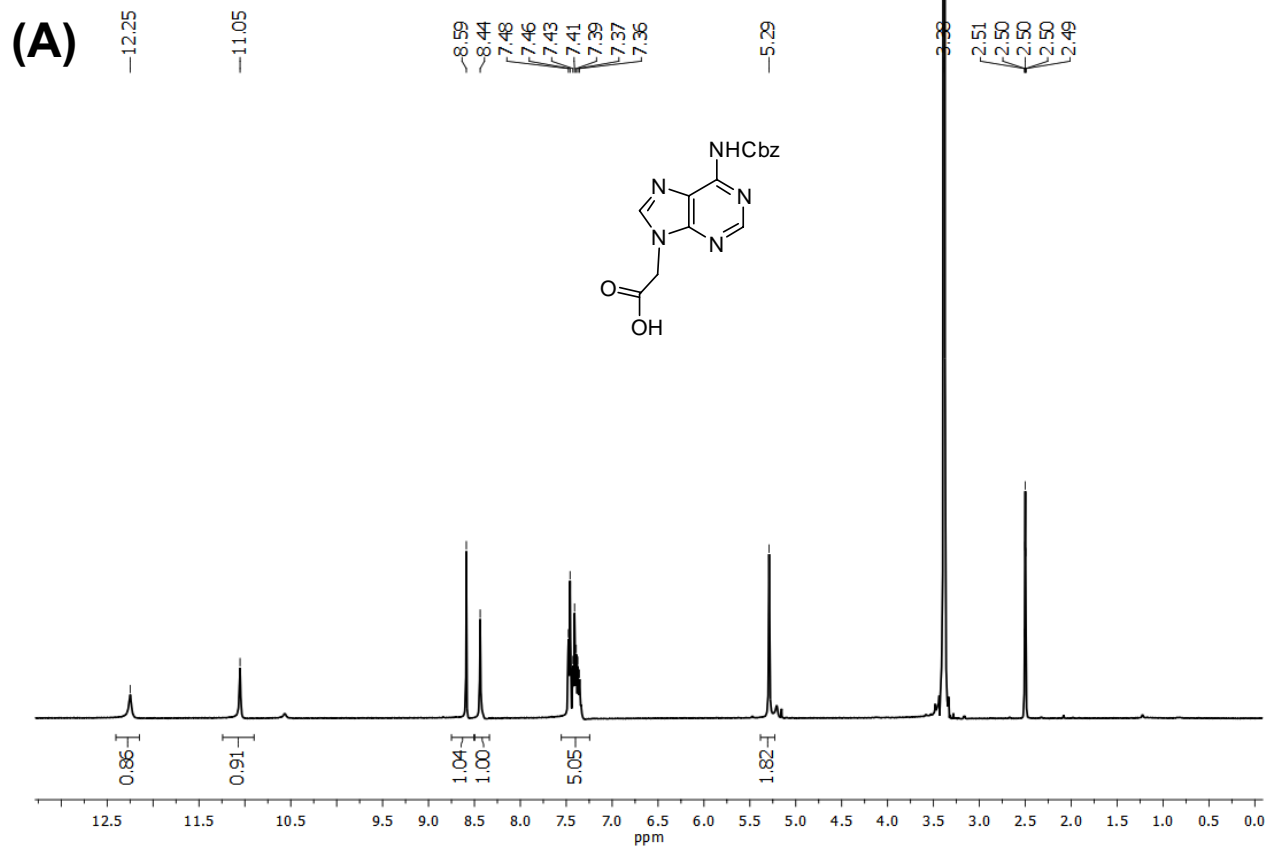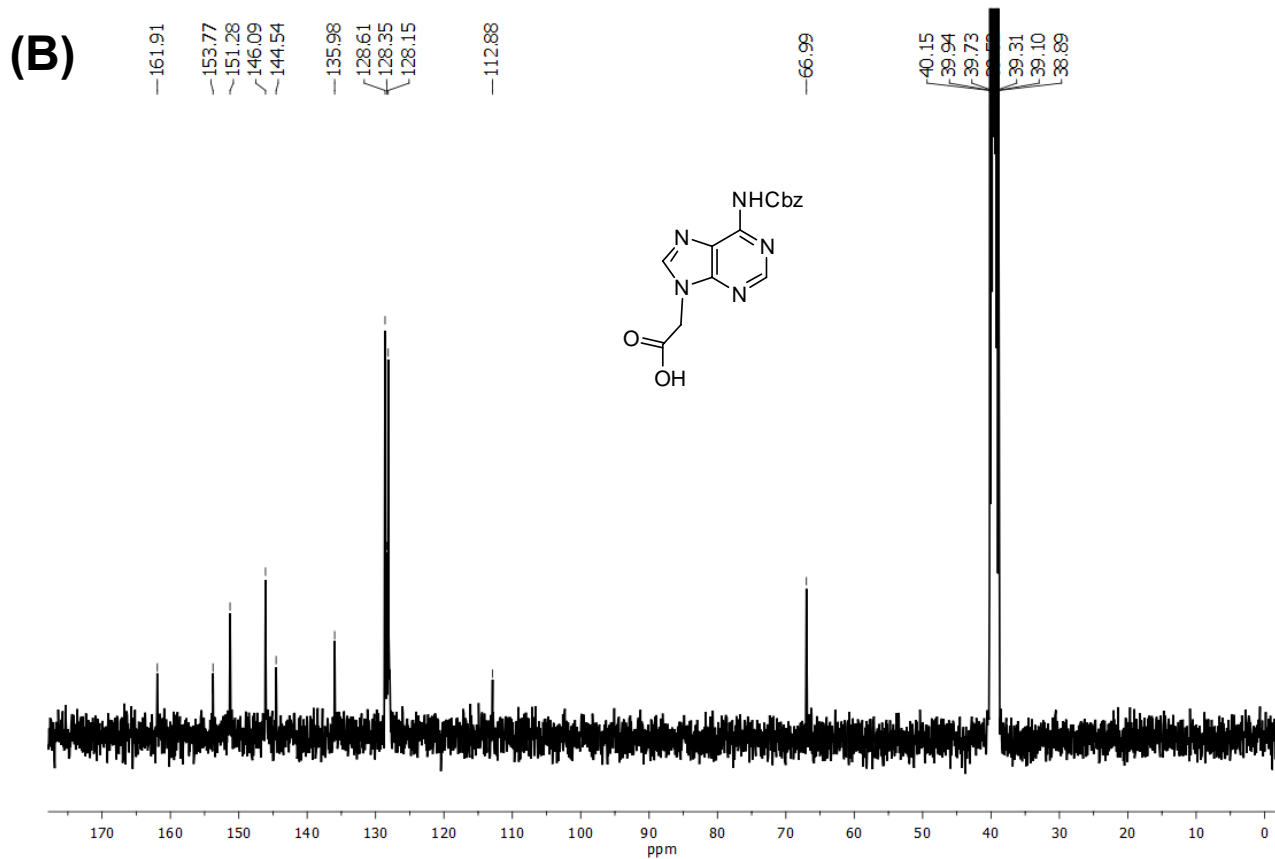

Figure S20: (A)  $^1\text{H}$ -NMR and (B)  $^{13}\text{C}$ -NMR spectra of  $\text{A}^{\text{NHCbz}}\text{-N}^9\text{-acetic acid}$

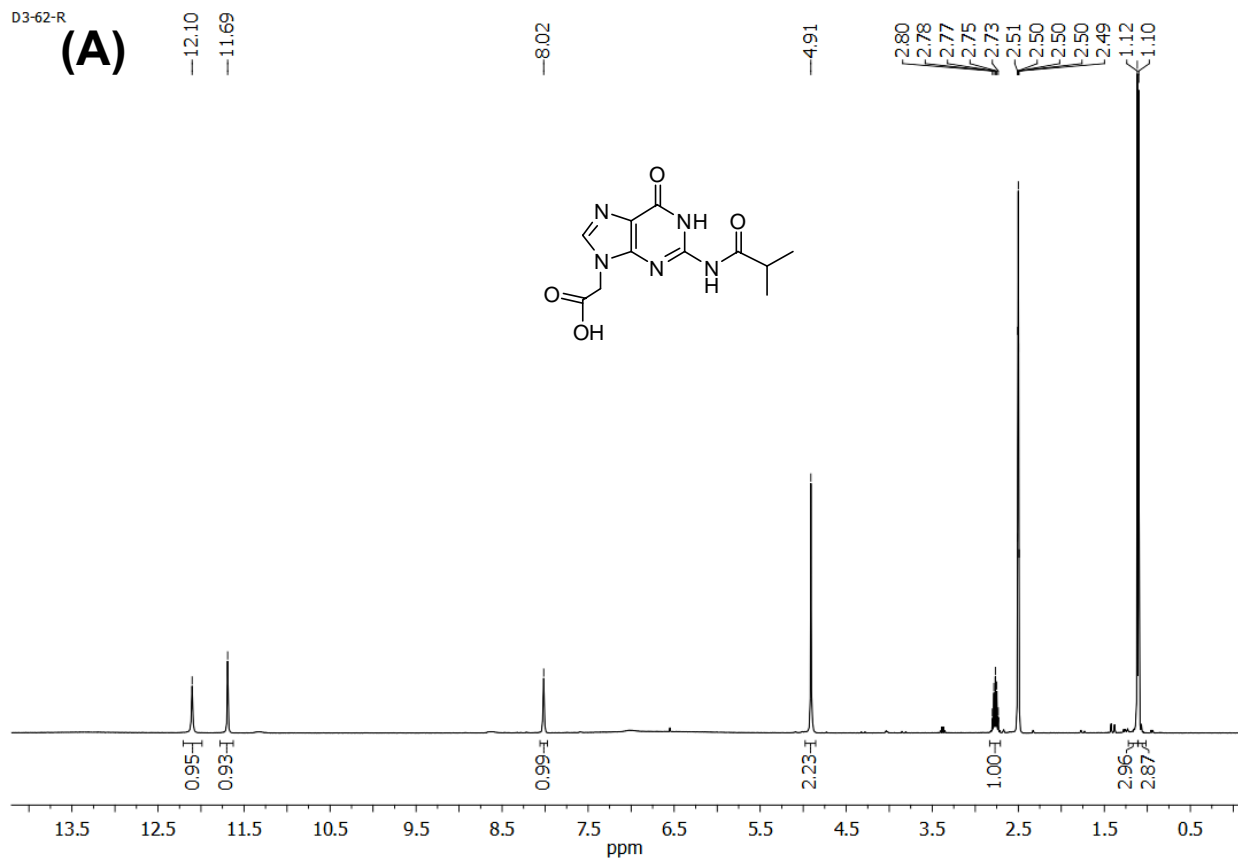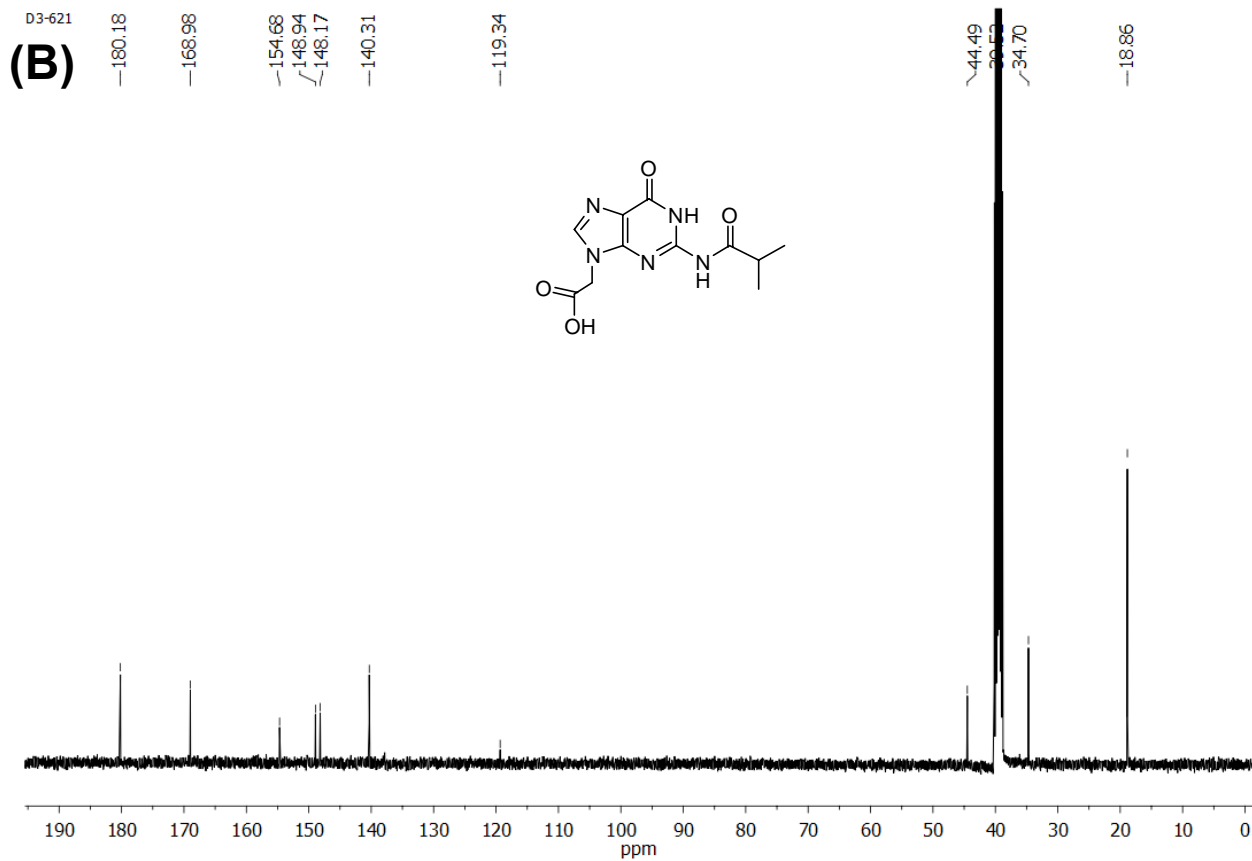

Figure S21: (A)  $^1\text{H}$ -NMR and (B)  $^{13}\text{C}$ -NMR spectra of *G<sup>ibu</sup>-N<sup>9</sup>-acetic acid*



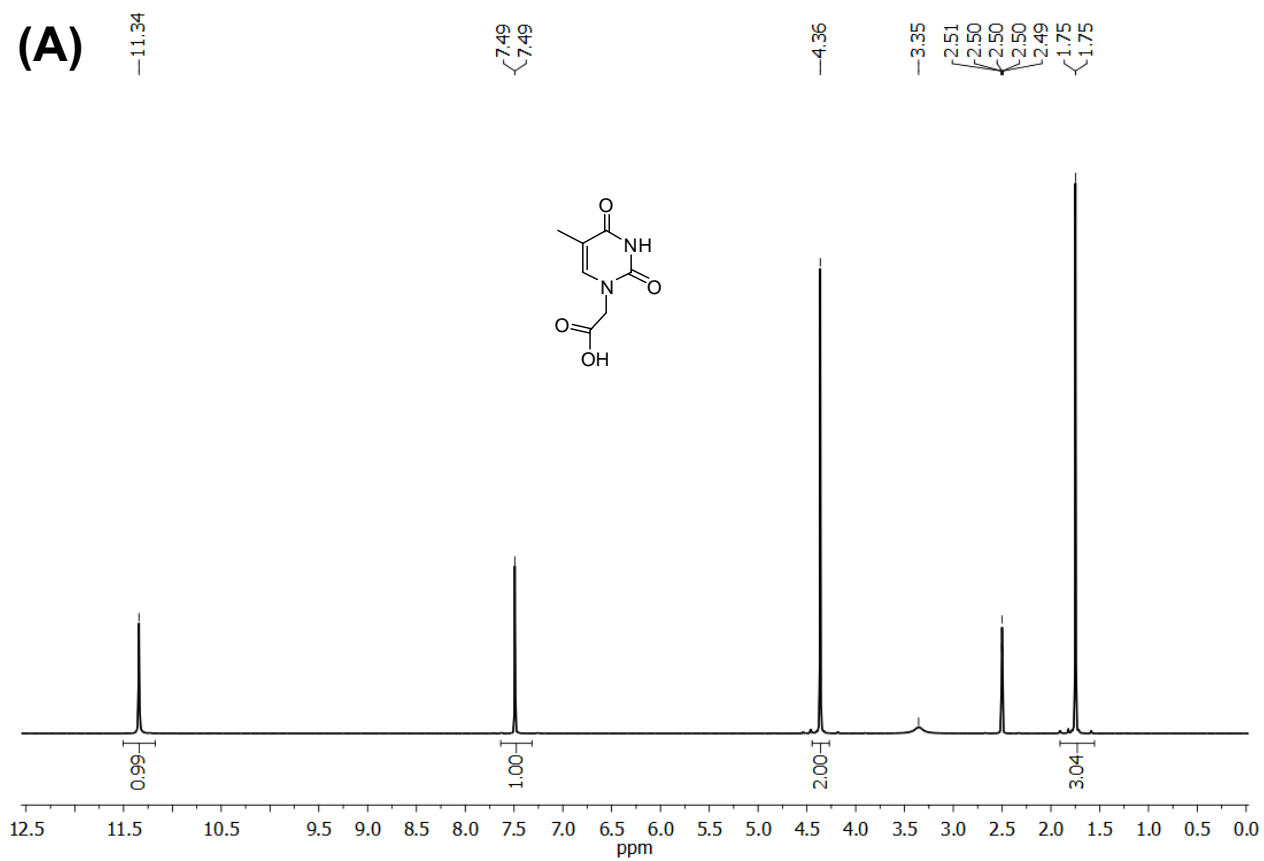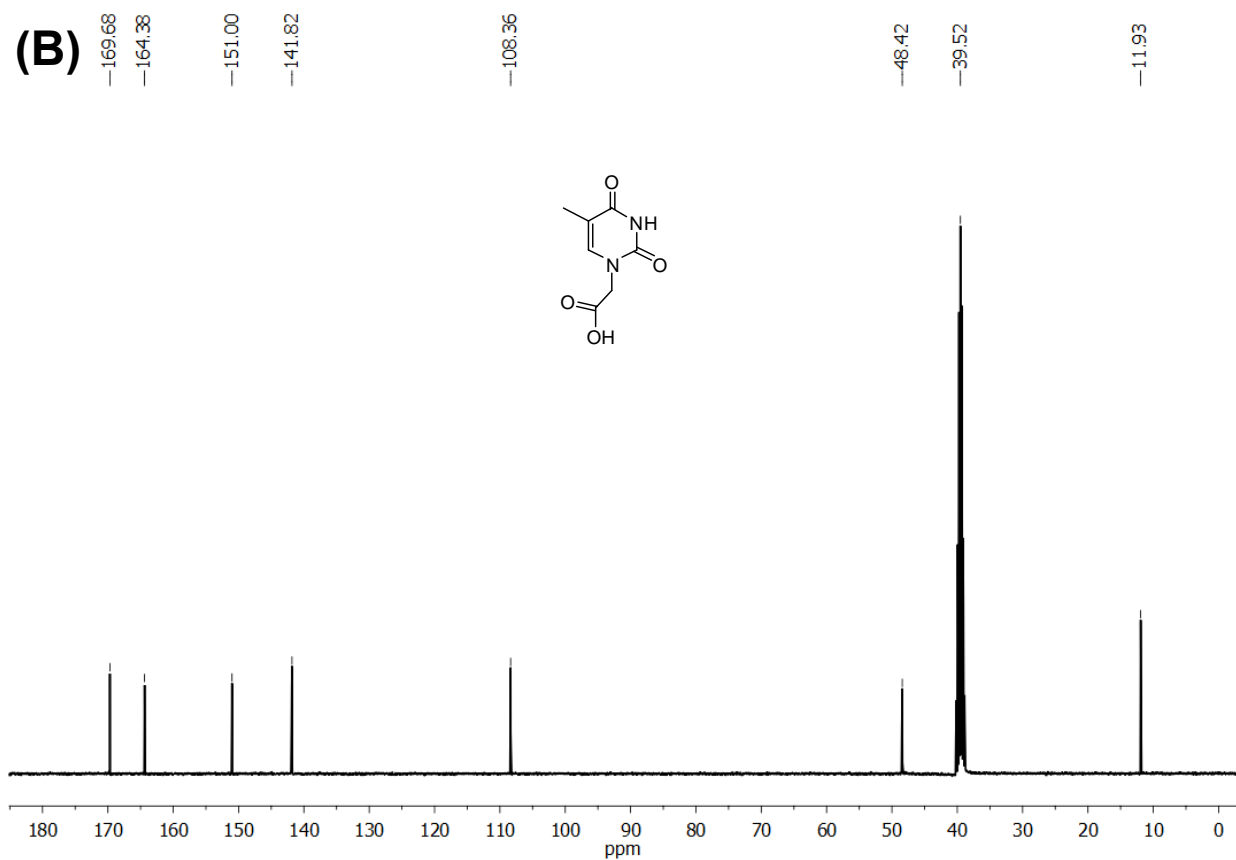

**Figure S22: (A)  $^1\text{H}$ -NMR and (B)  $^{13}\text{C}$ -NMR spectra of Thymine-1-acetic acid**

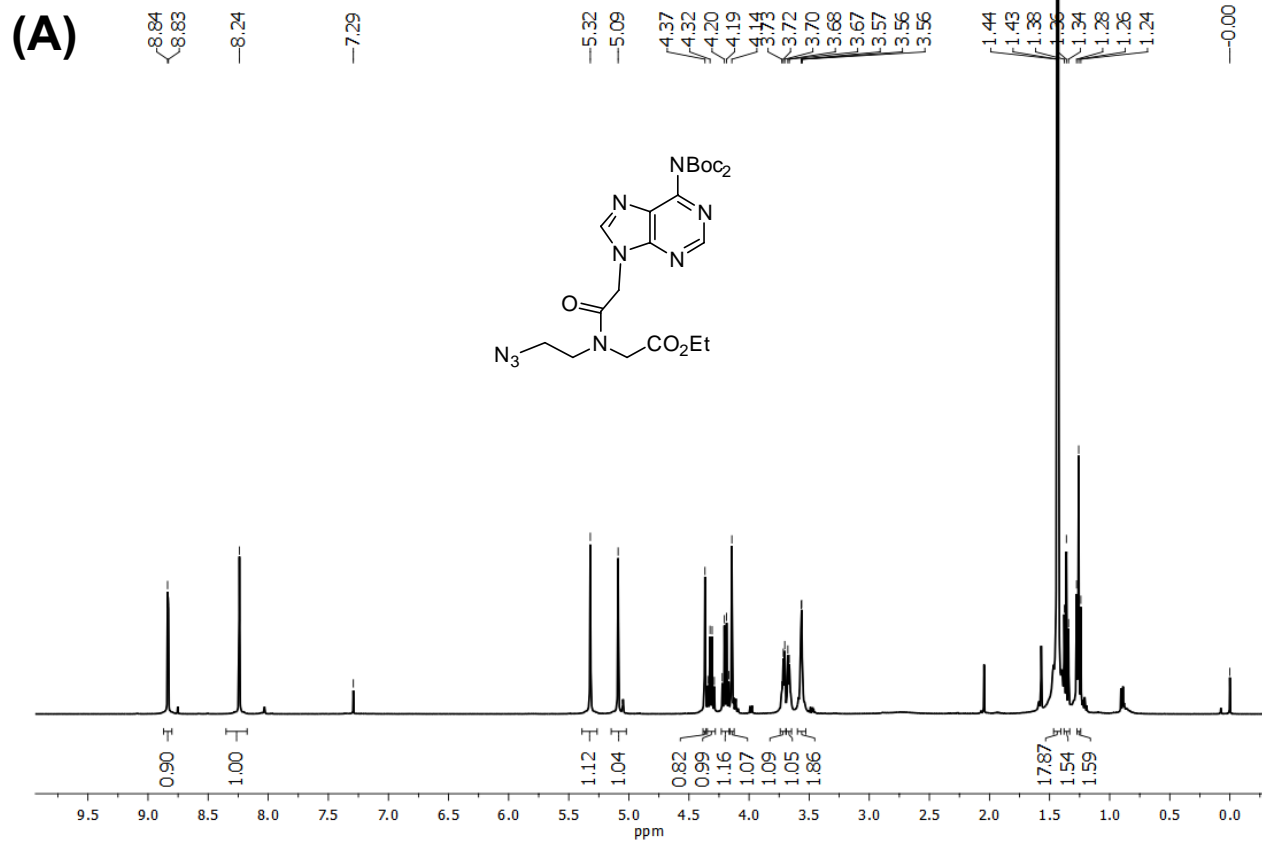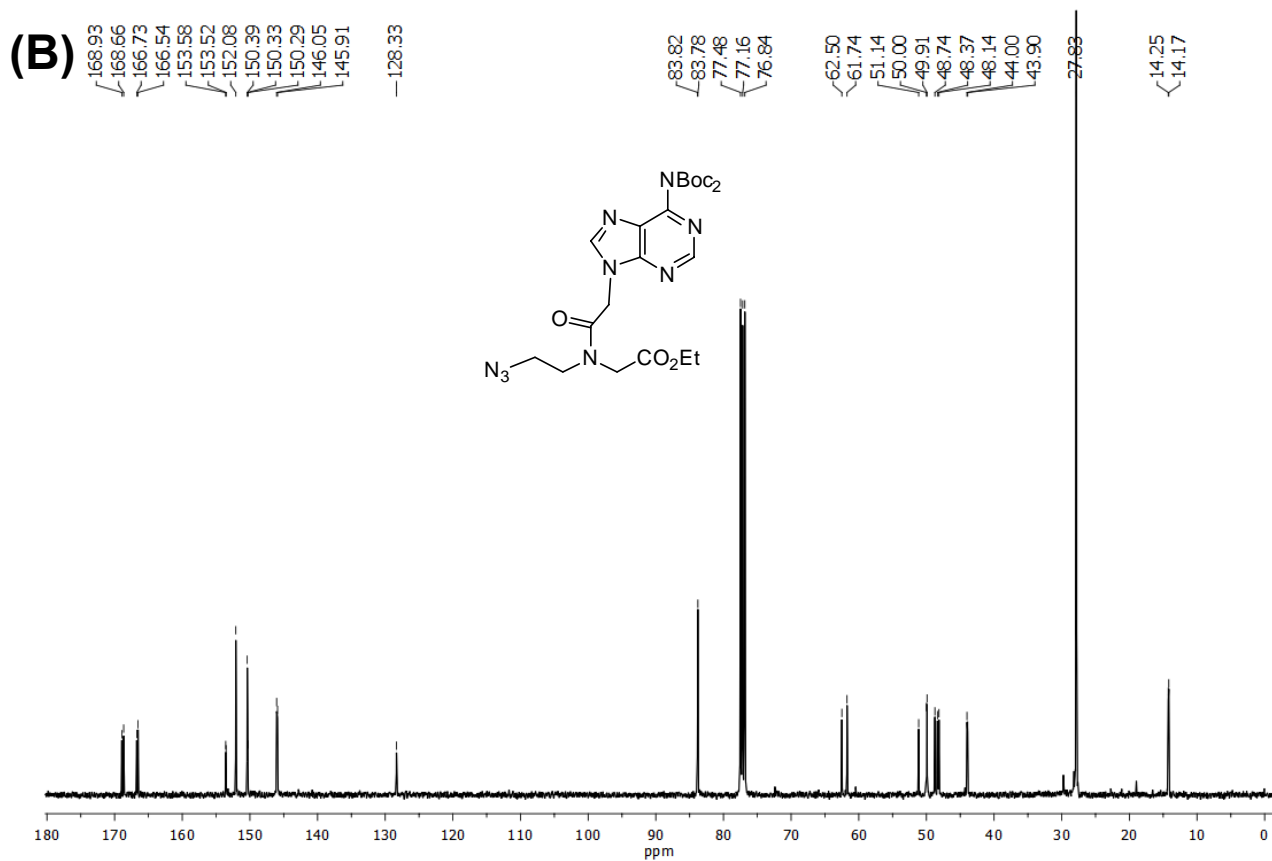

Figure S23: (A) <sup>1</sup>H-NMR and (B) <sup>13</sup>C-NMR spectra of **5a**

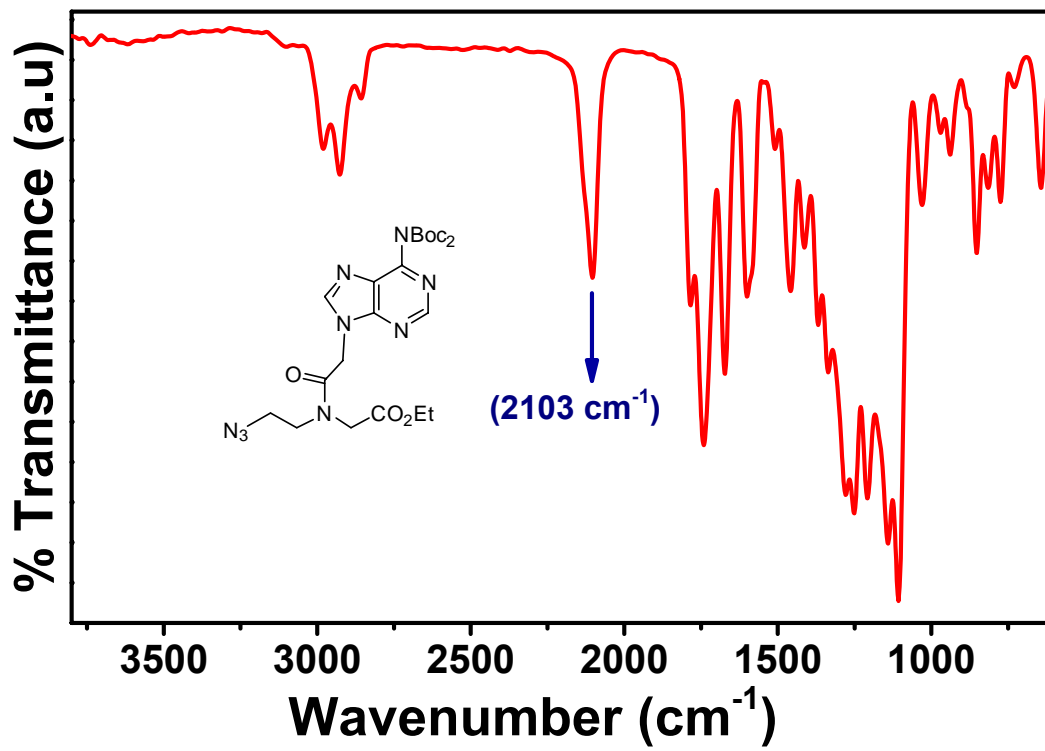

Figure S24: FTIR spectrum of 5a

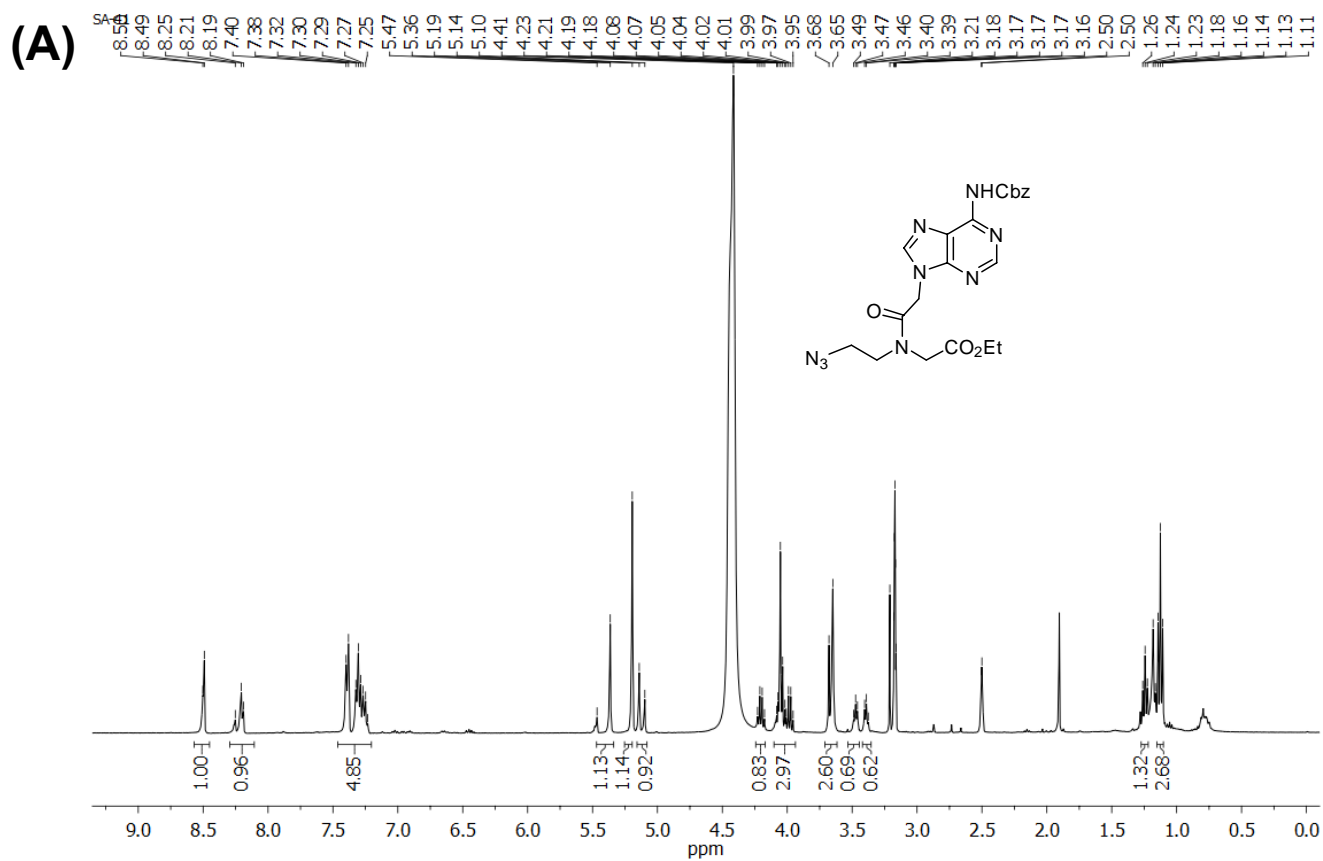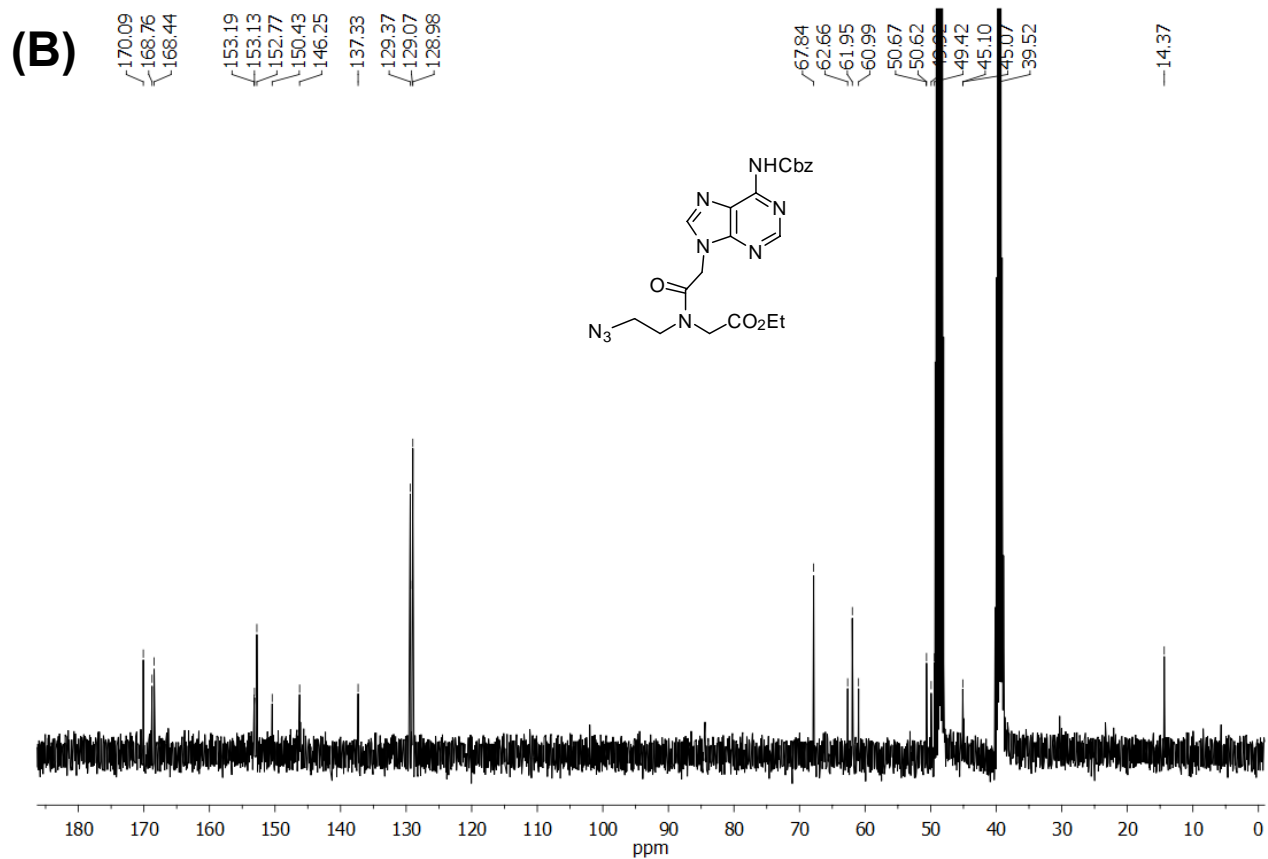

Figure S25: (A)  $^1\text{H}$ -NMR and (B)  $^{13}\text{C}$ -NMR spectra of **5b**

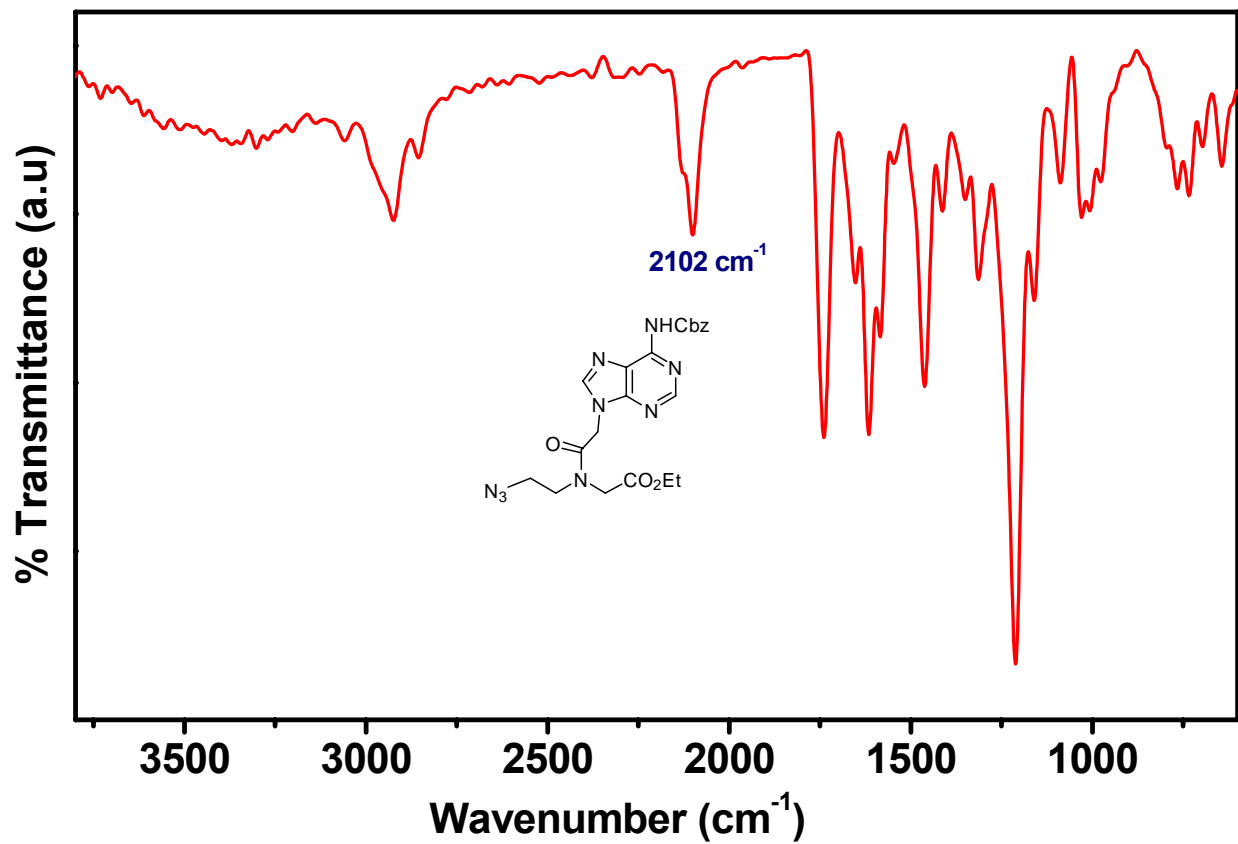

Figure S26: FTIR spectrum of 5b

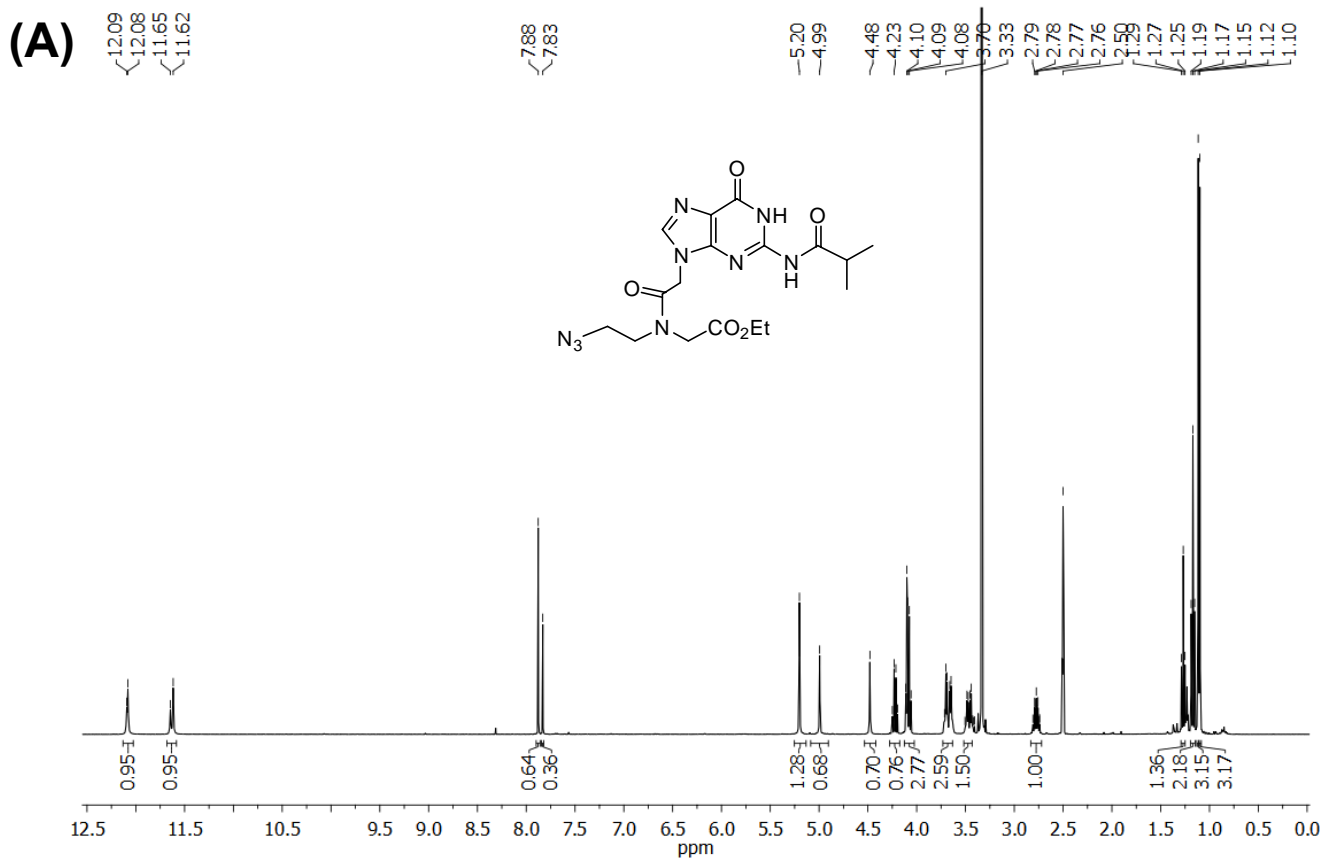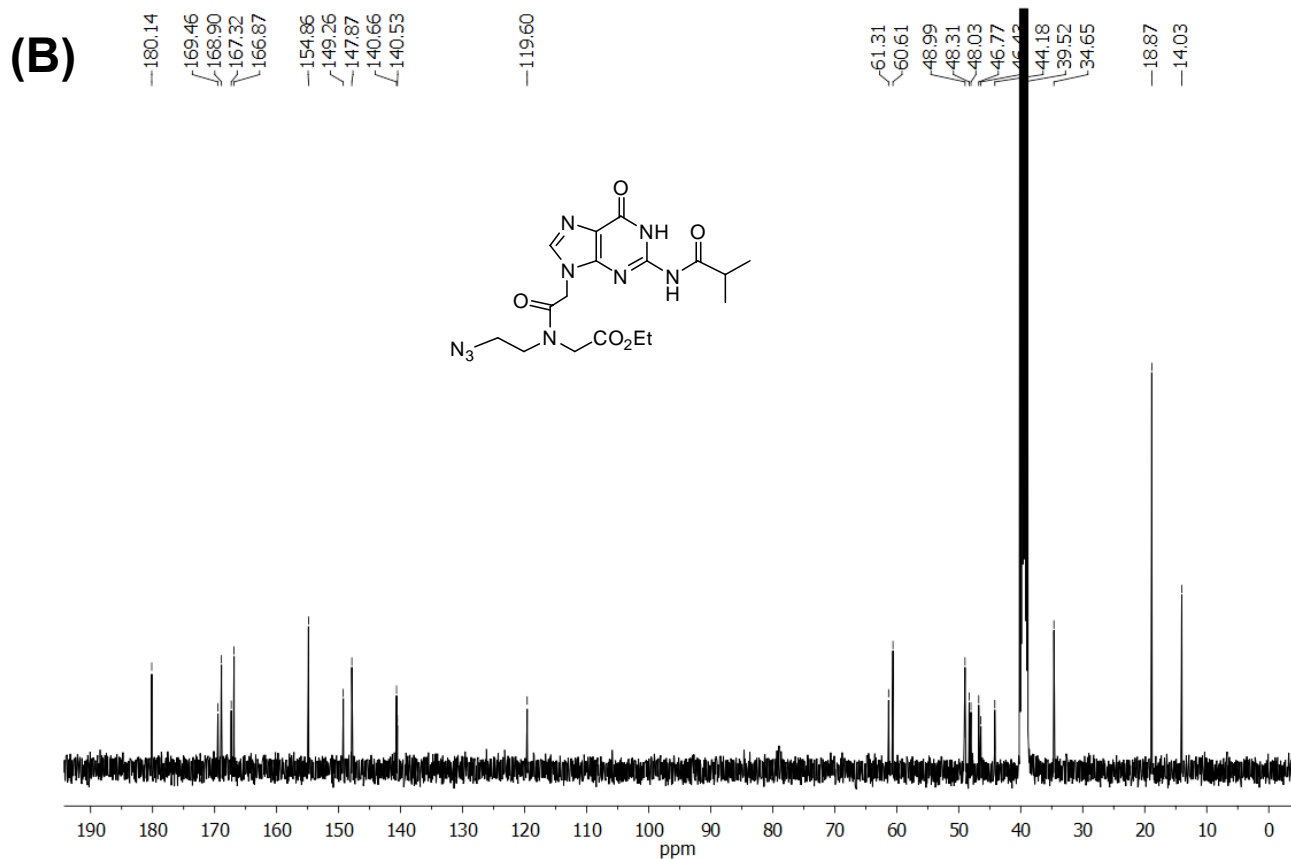

**Figure S27:** (A) <sup>1</sup>H-NMR and (B) <sup>13</sup>C-NMR spectra of **5c**

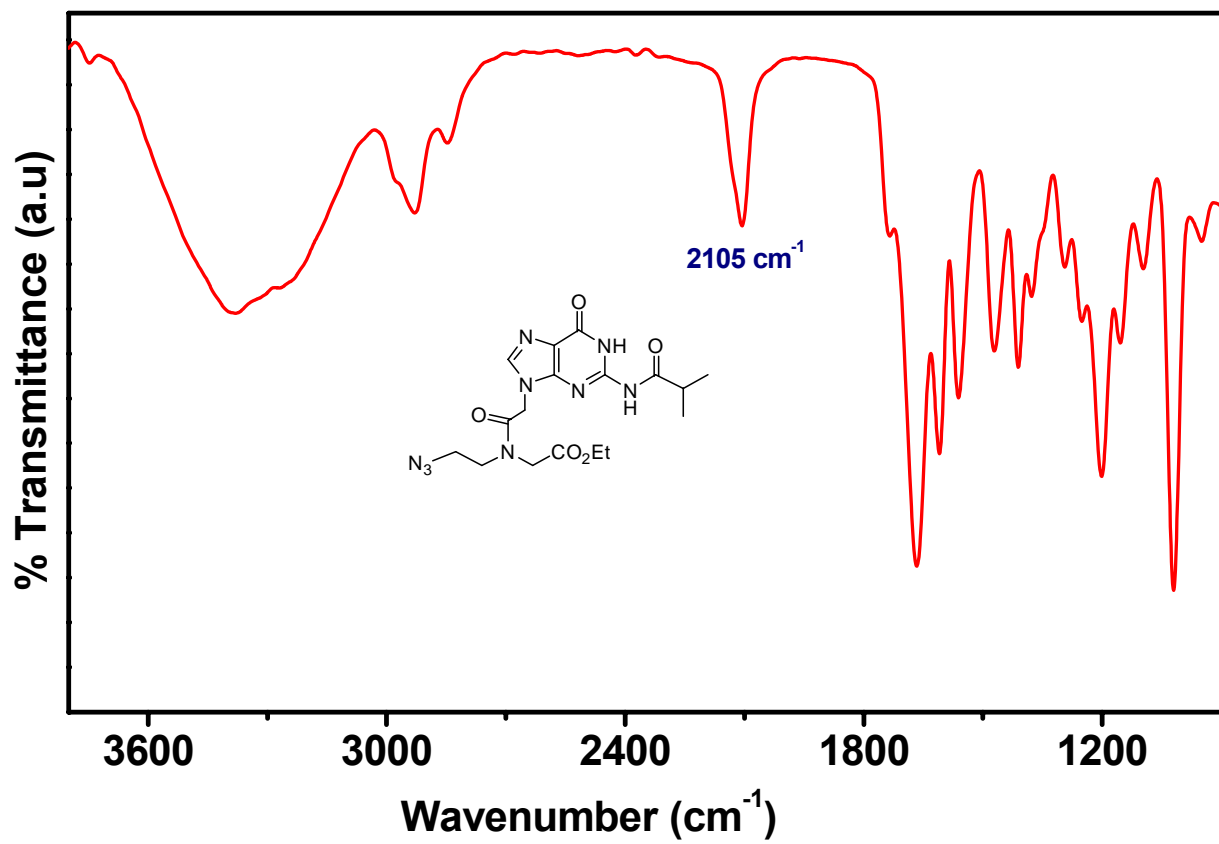

Figure S28: FTIR spectrum of 5c

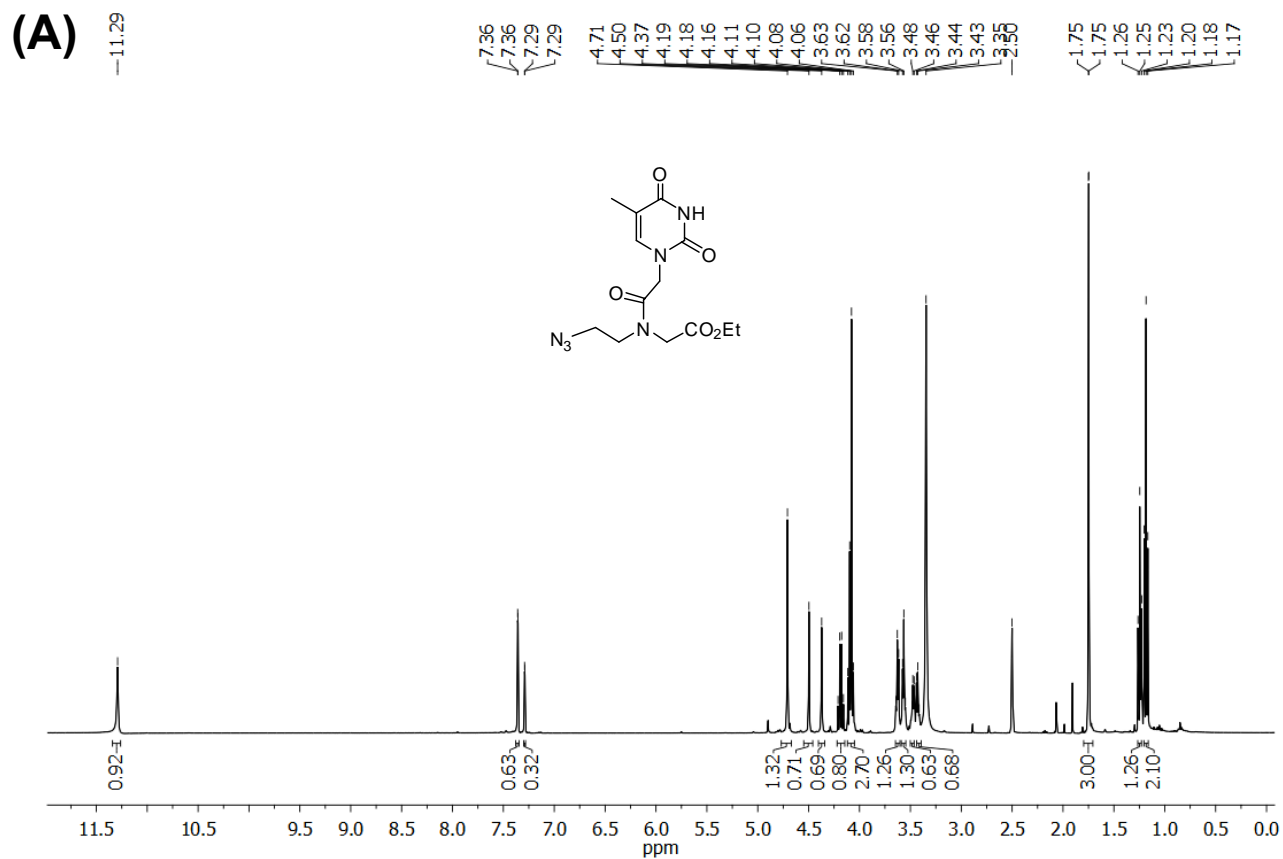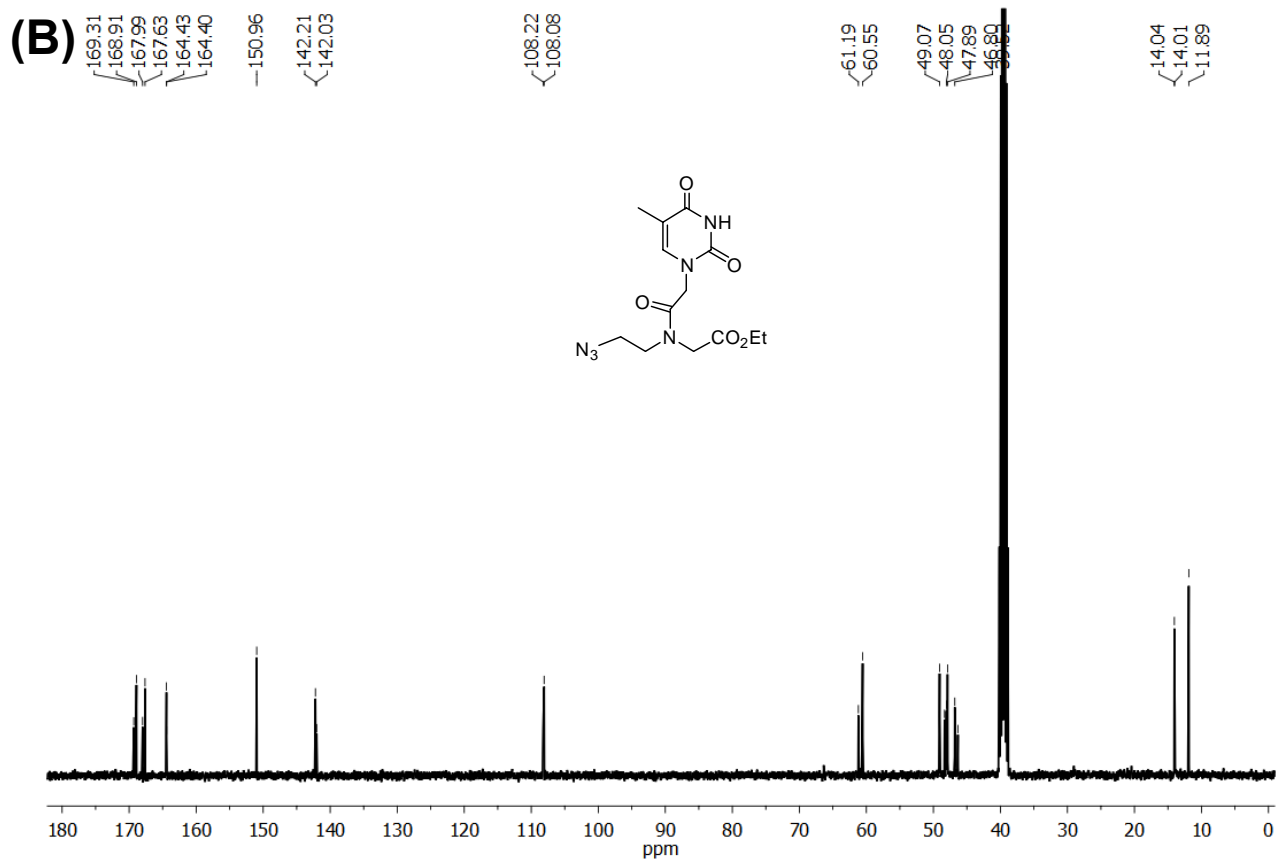

Figure S29: (A)  $^1\text{H-NMR}$  and (B)  $^{13}\text{C-NMR}$  spectra of **5d**



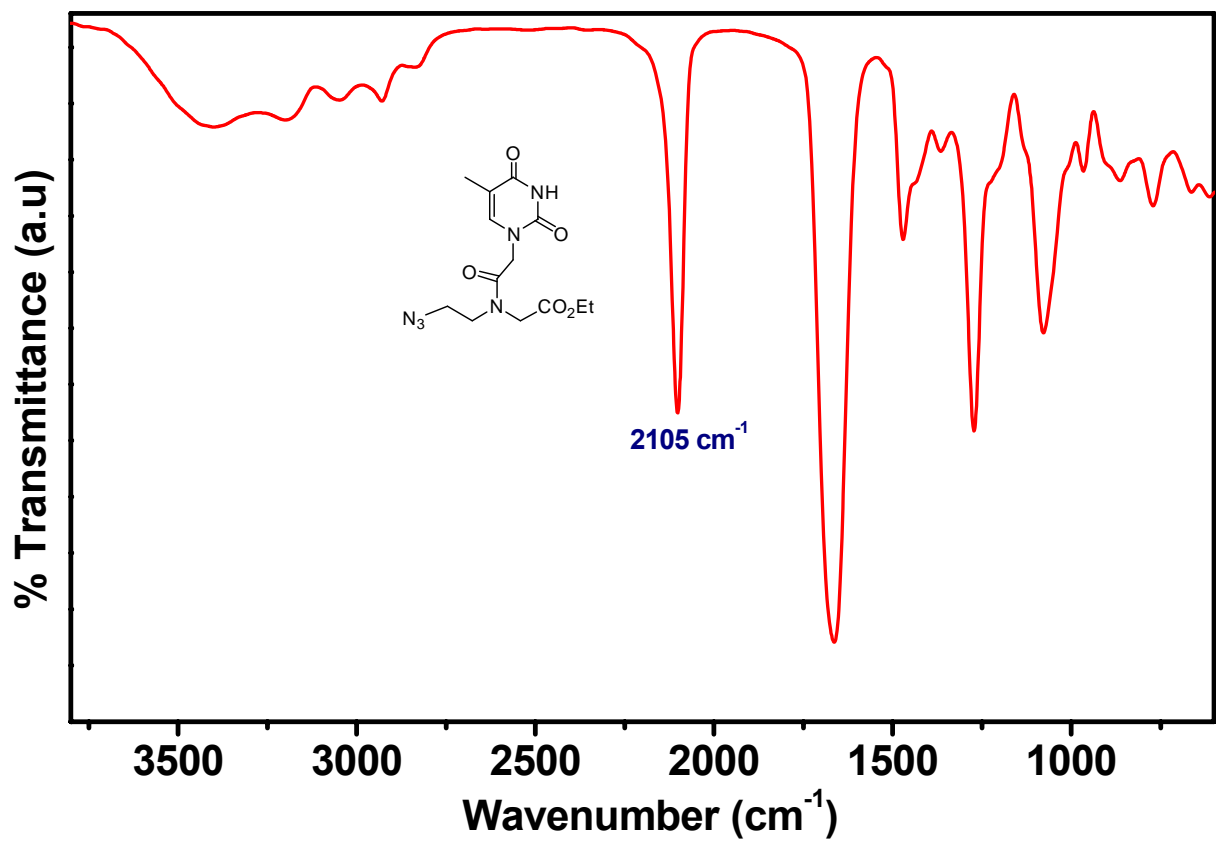

Figure S30: FTIR spectrum of 5d

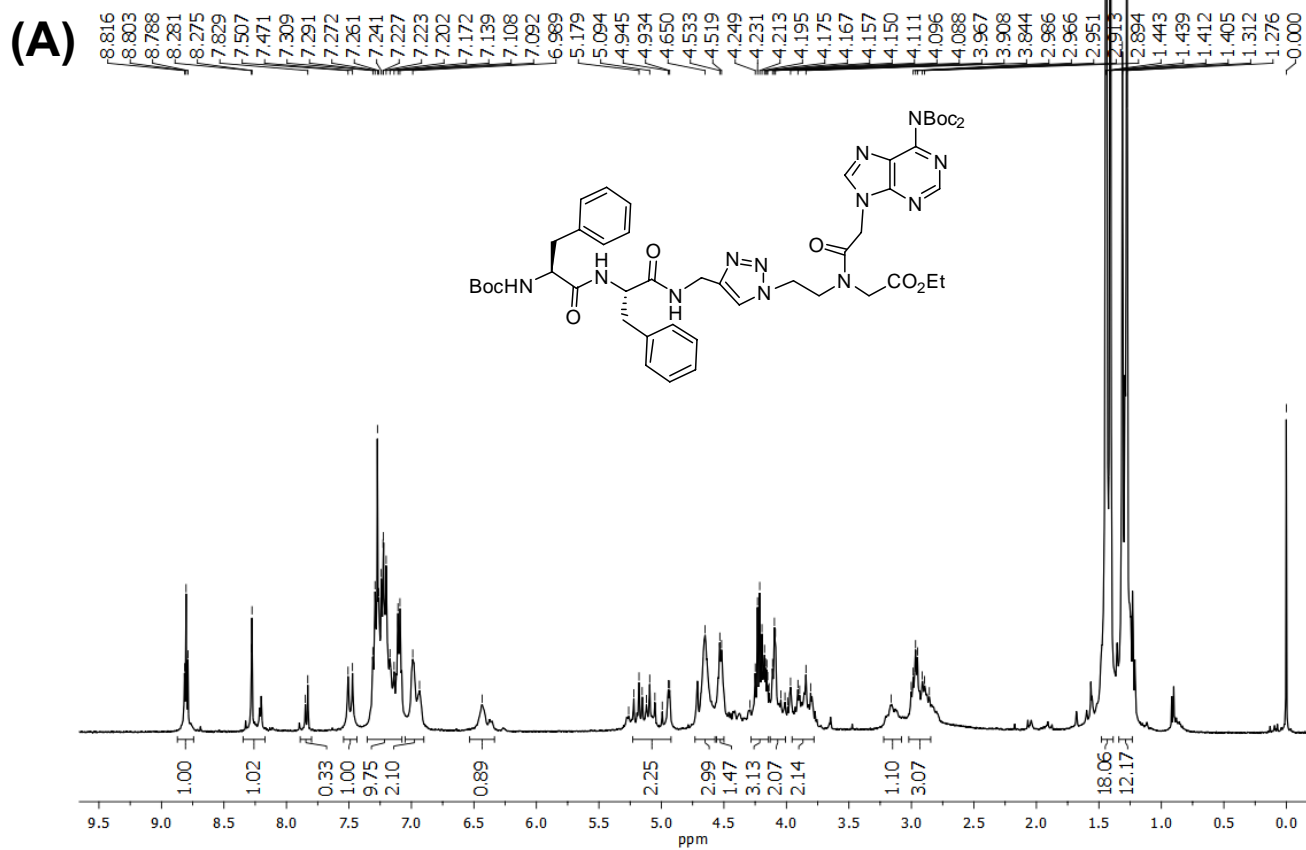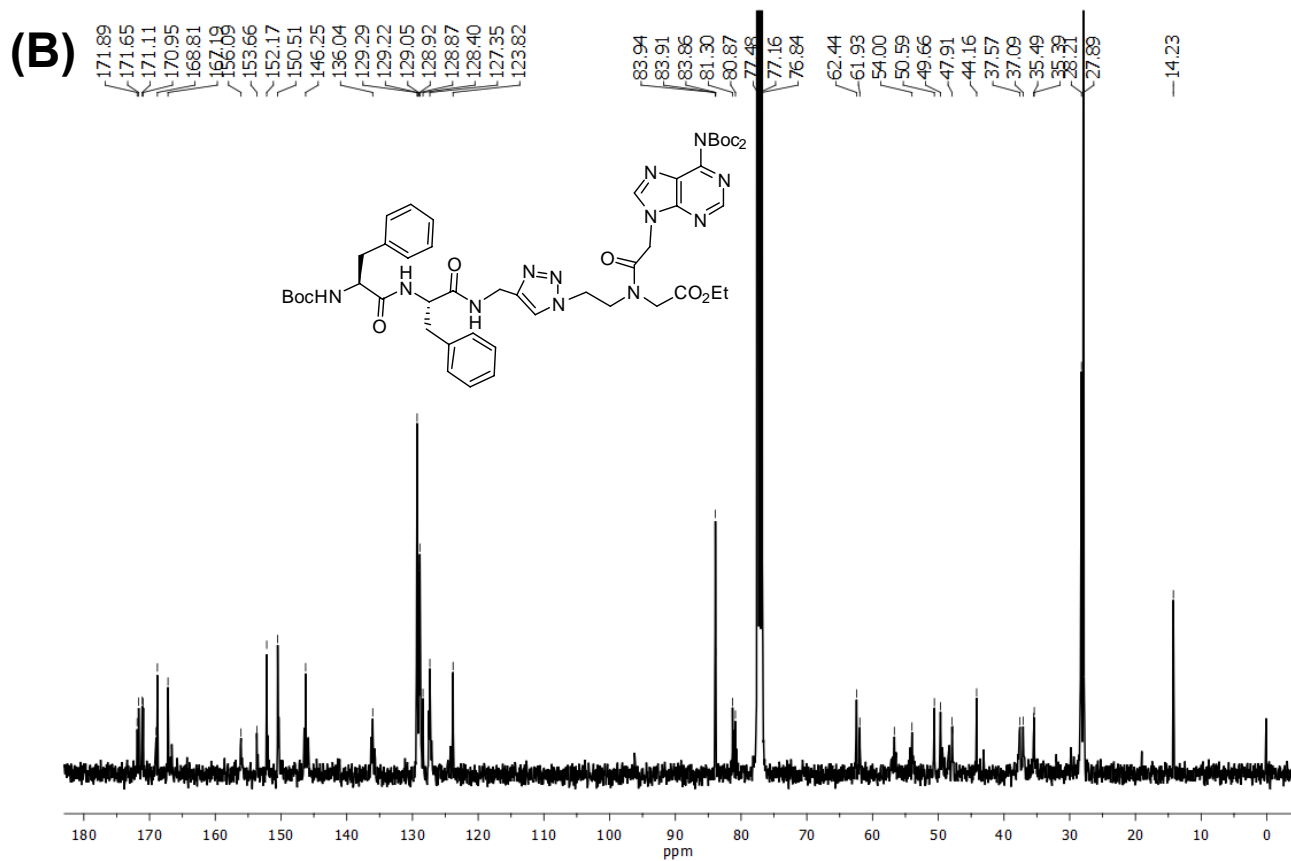

Figure S31: (A)  $^1\text{H-NMR}$  and (B)  $^{13}\text{C-NMR}$  spectra of peptide 6a

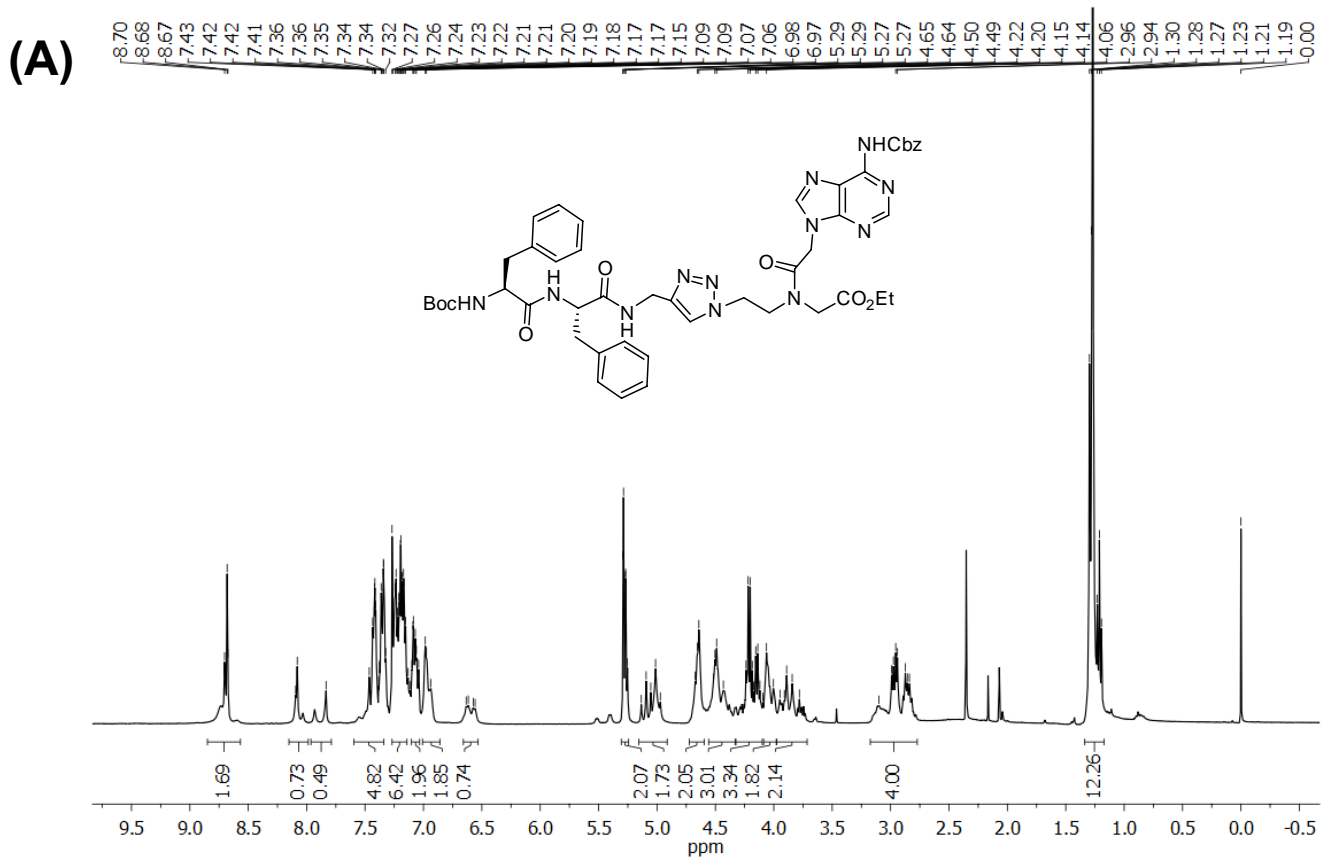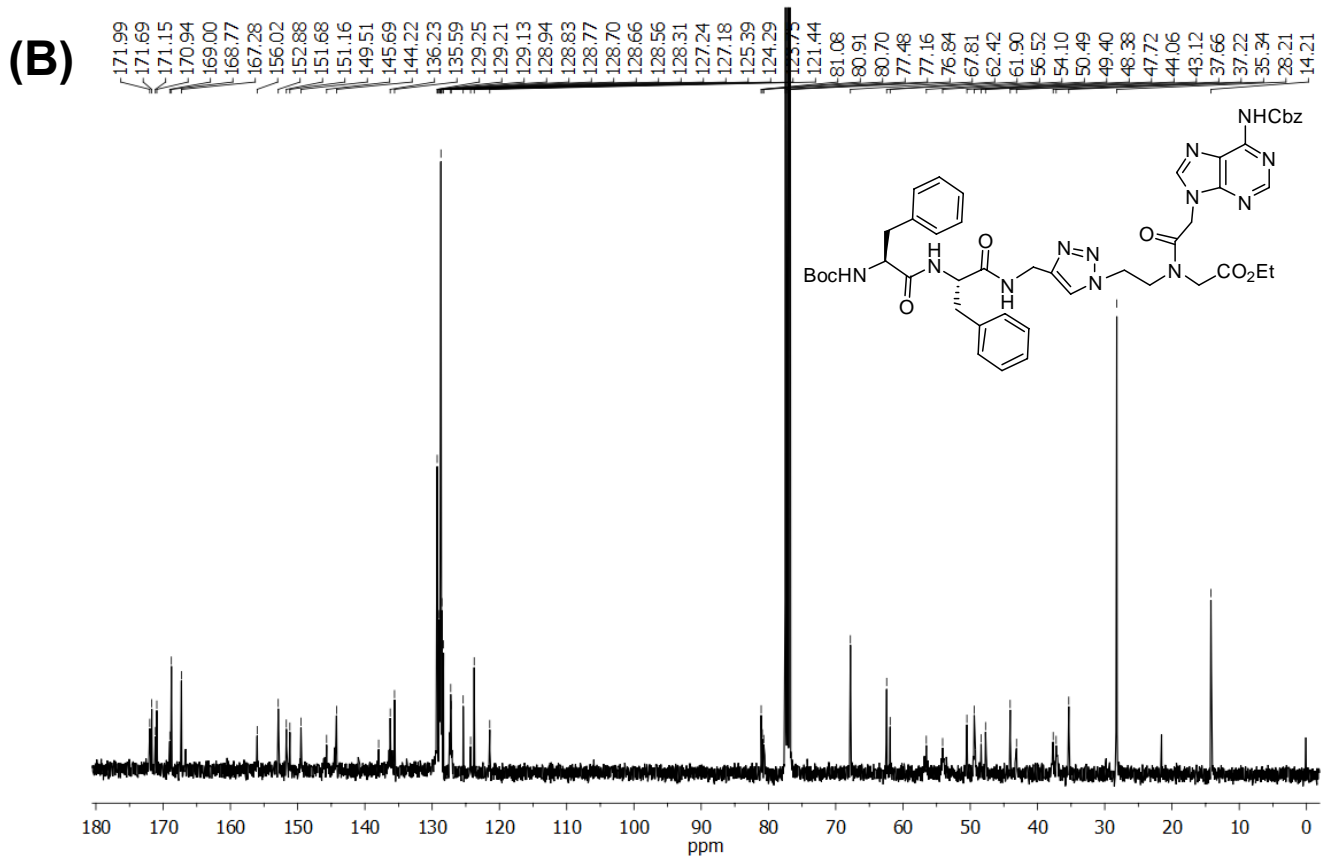

Figure S32: (A) <sup>1</sup>H-NMR and (B) <sup>13</sup>C-NMR spectra of peptide **6b**

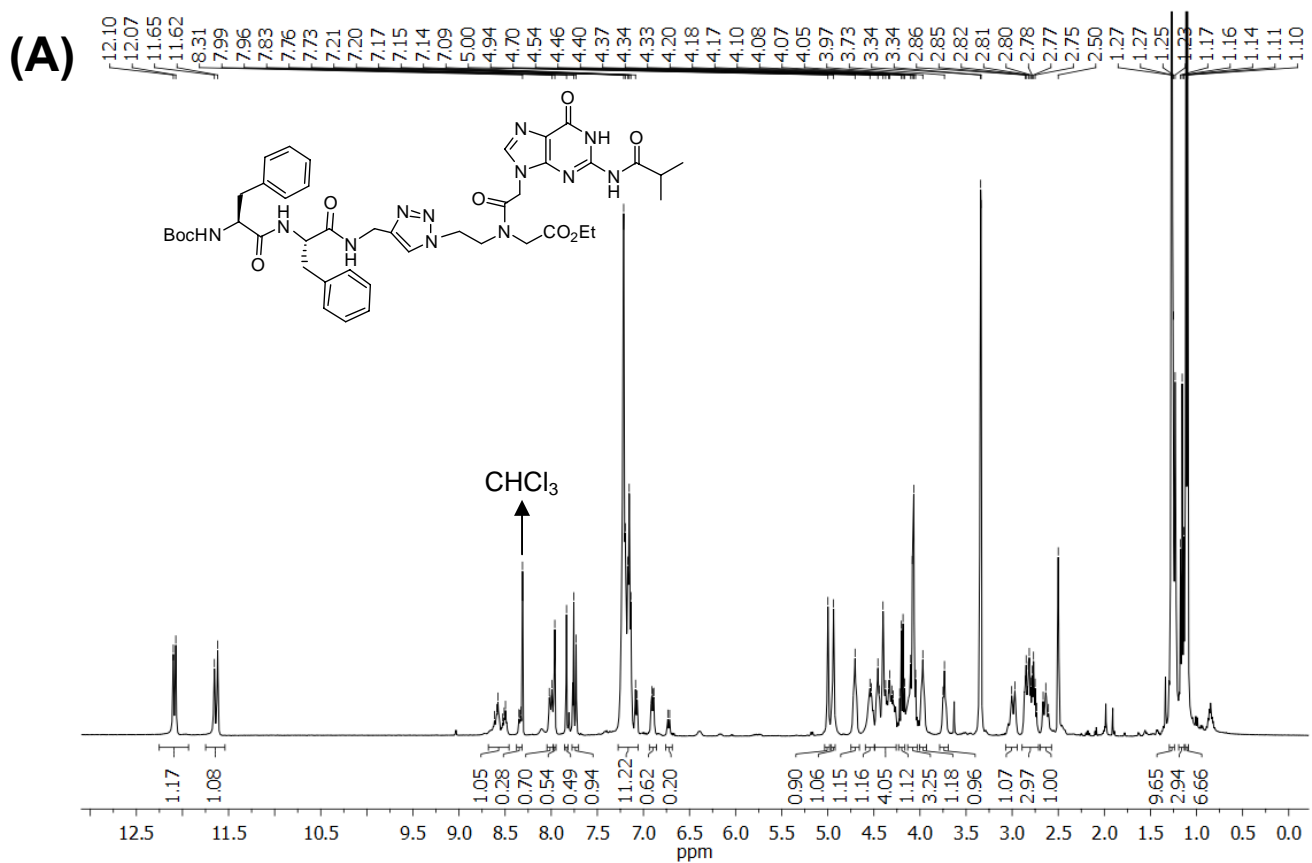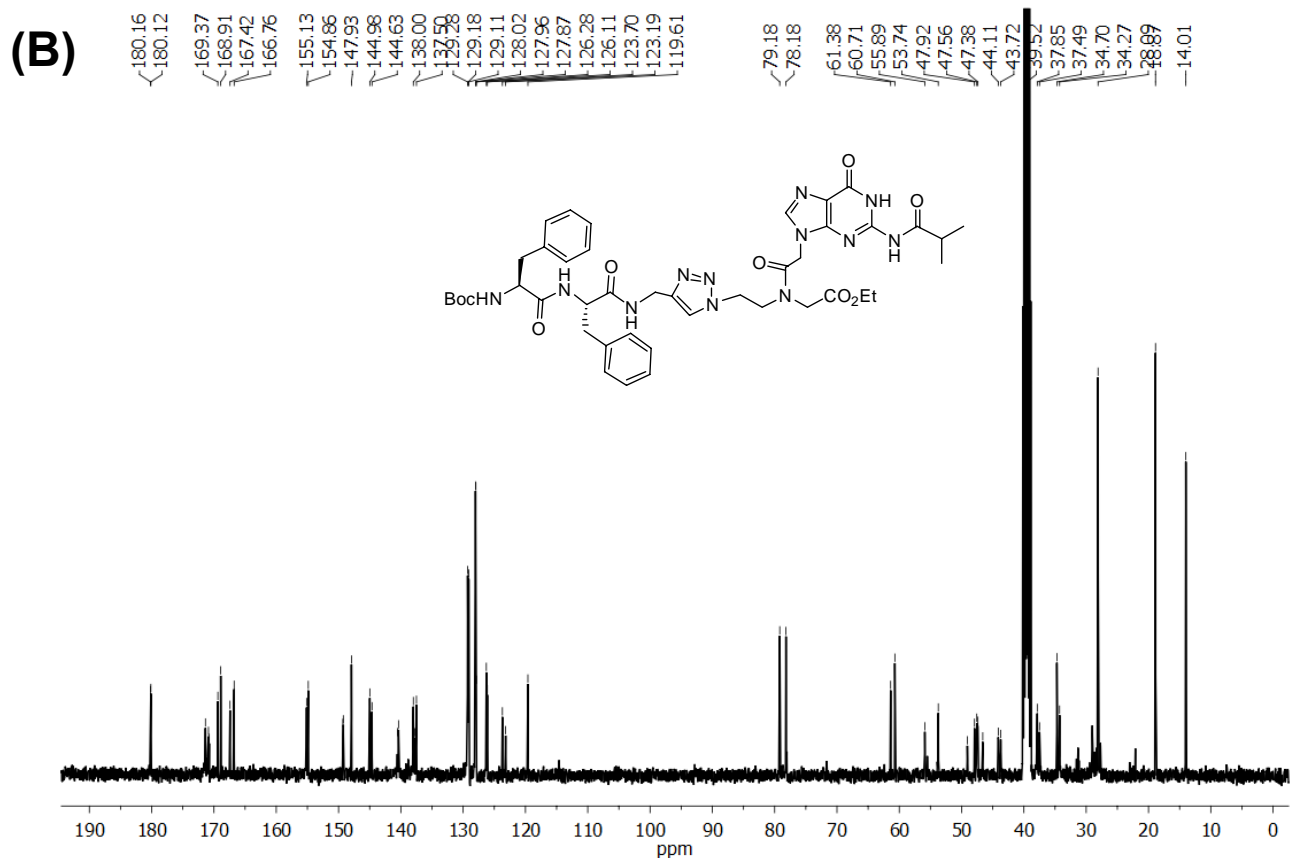

Figure S33: (A) <sup>1</sup>H-NMR and (B) <sup>13</sup>C-NMR spectra of peptide 6c

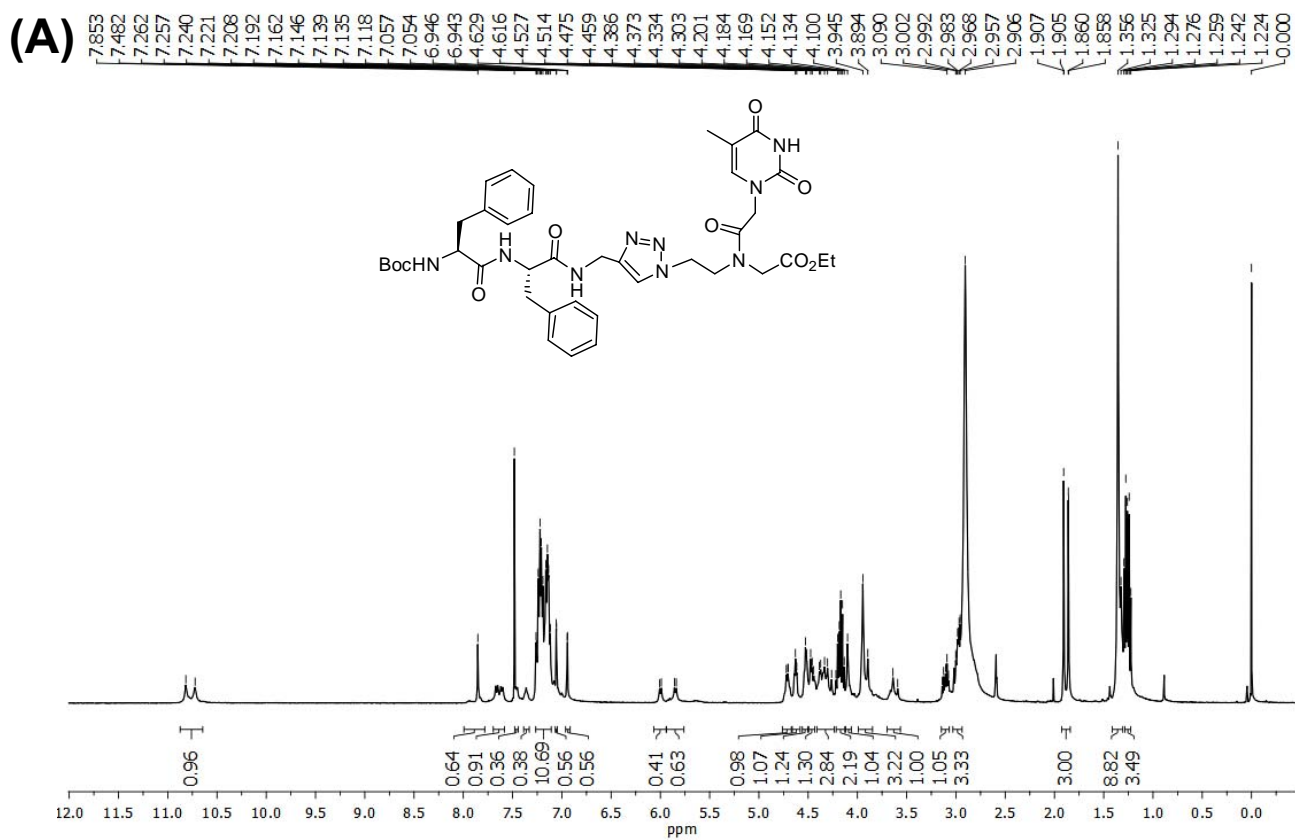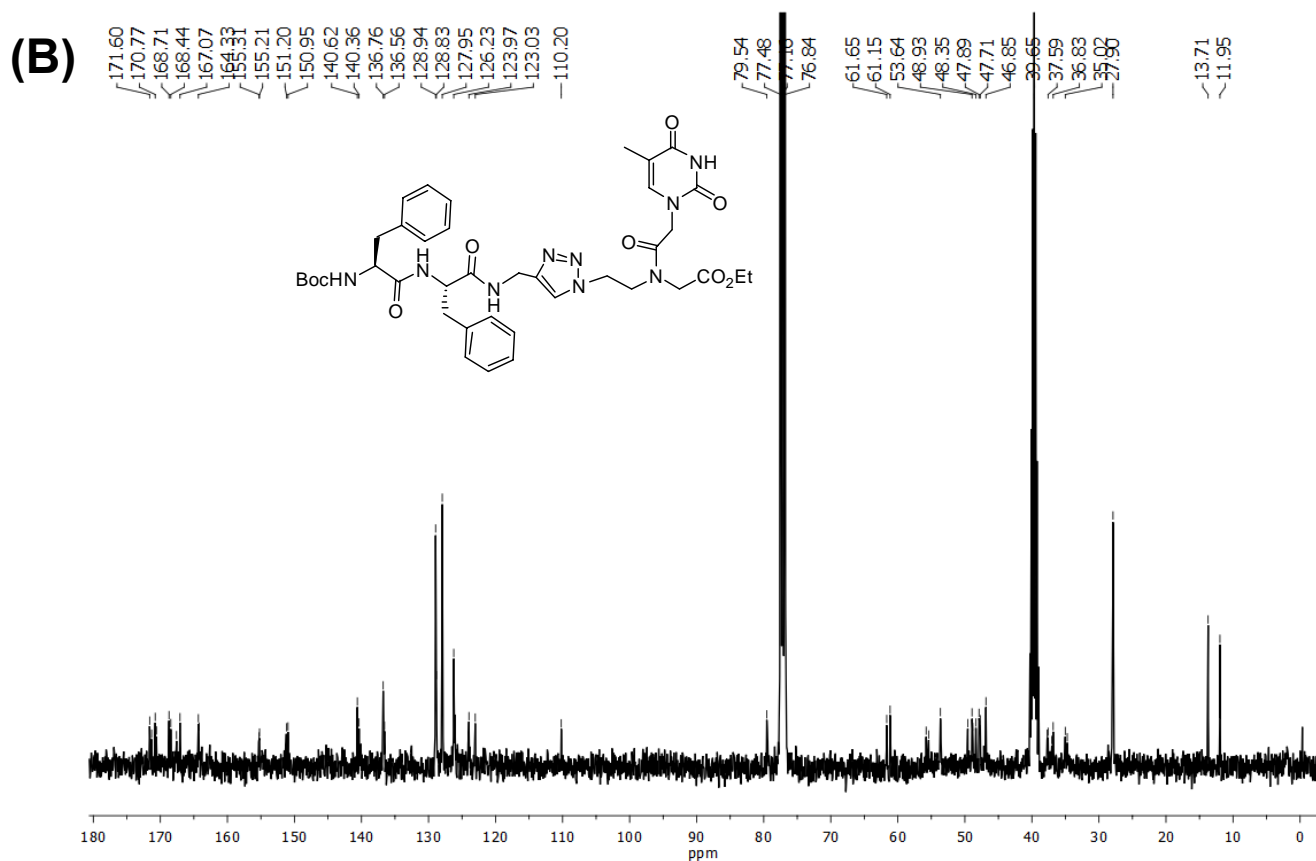

Figure S34: (A)  $^1\text{H-NMR}$  and (B)  $^{13}\text{C-NMR}$  spectra of peptide 6d

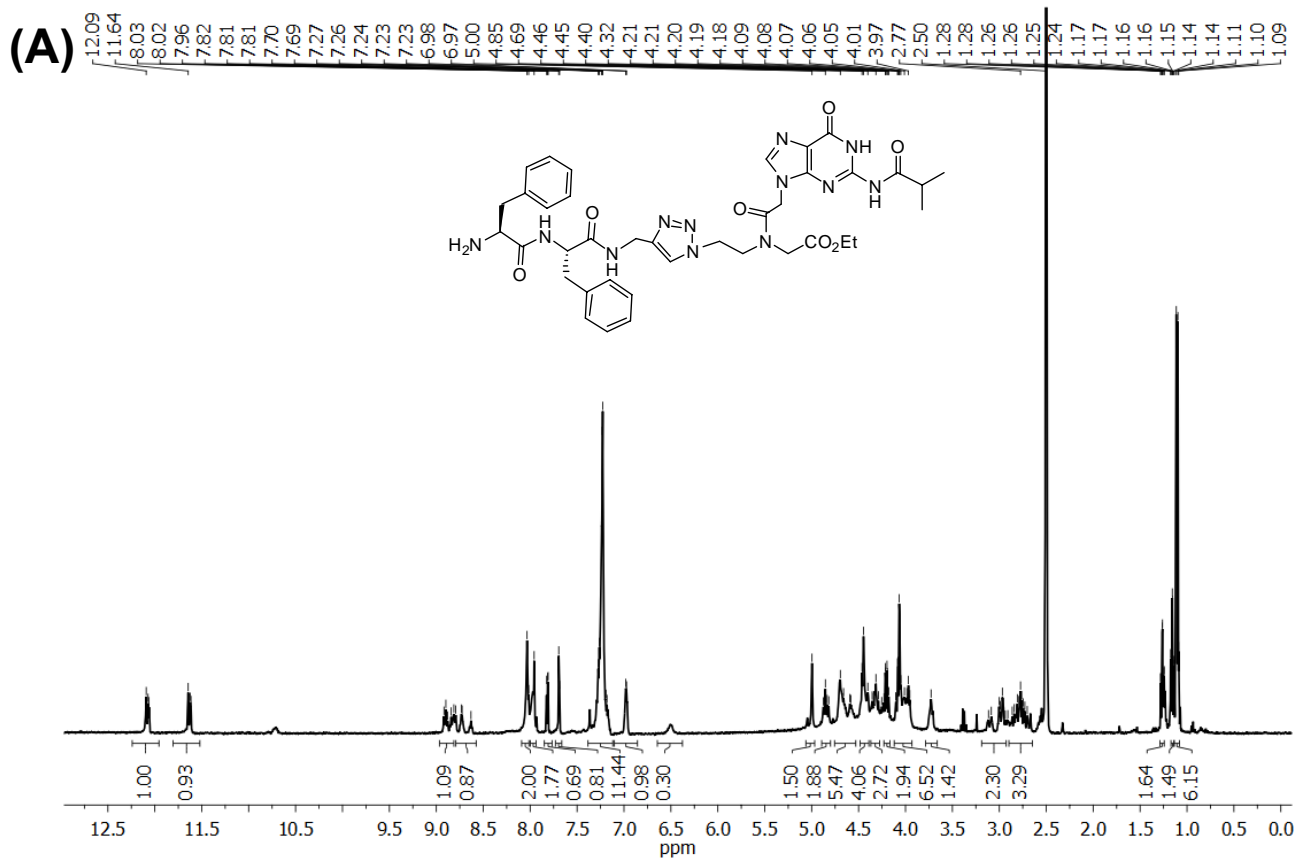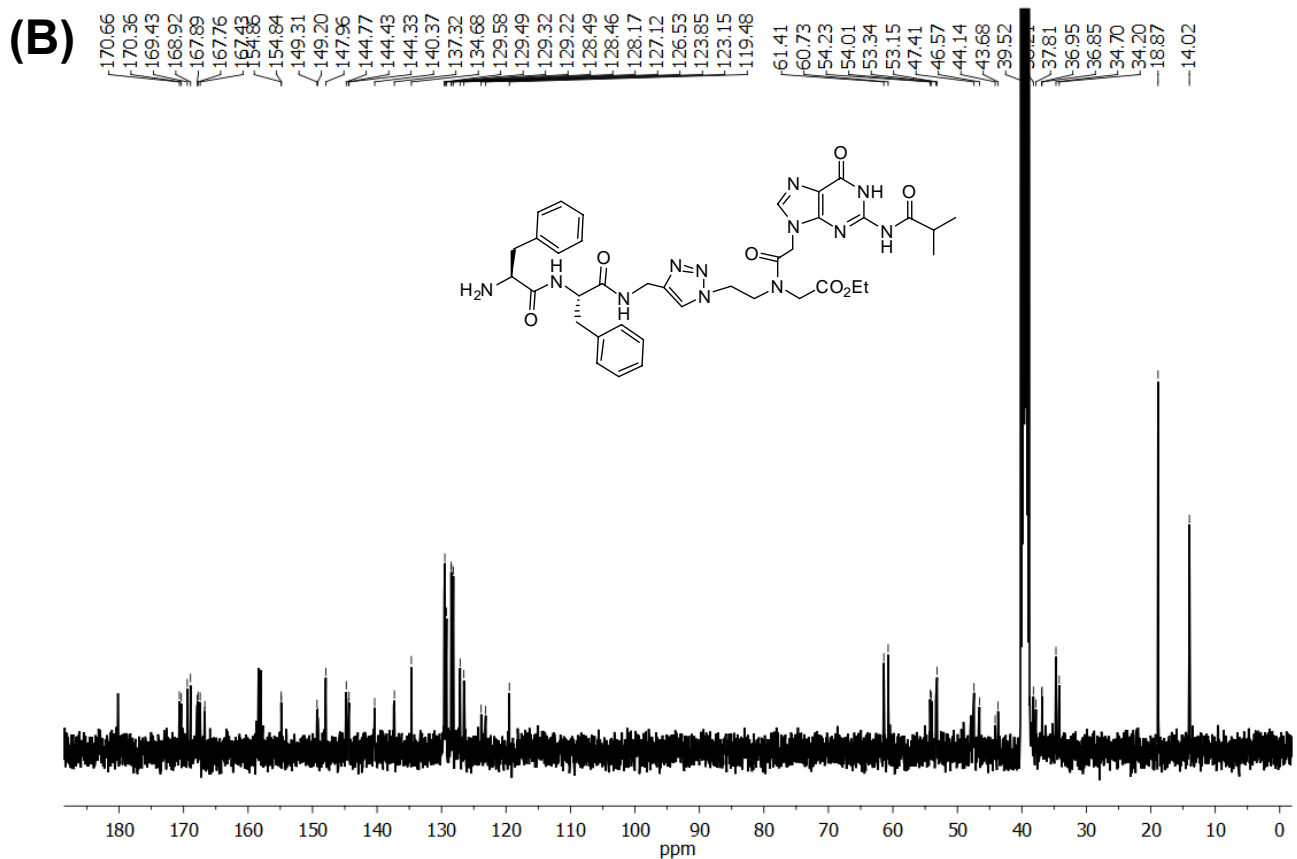

Figure S35: (A)  $^1\text{H-NMR}$  and (B)  $^{13}\text{C-NMR}$  spectra of peptide 7c

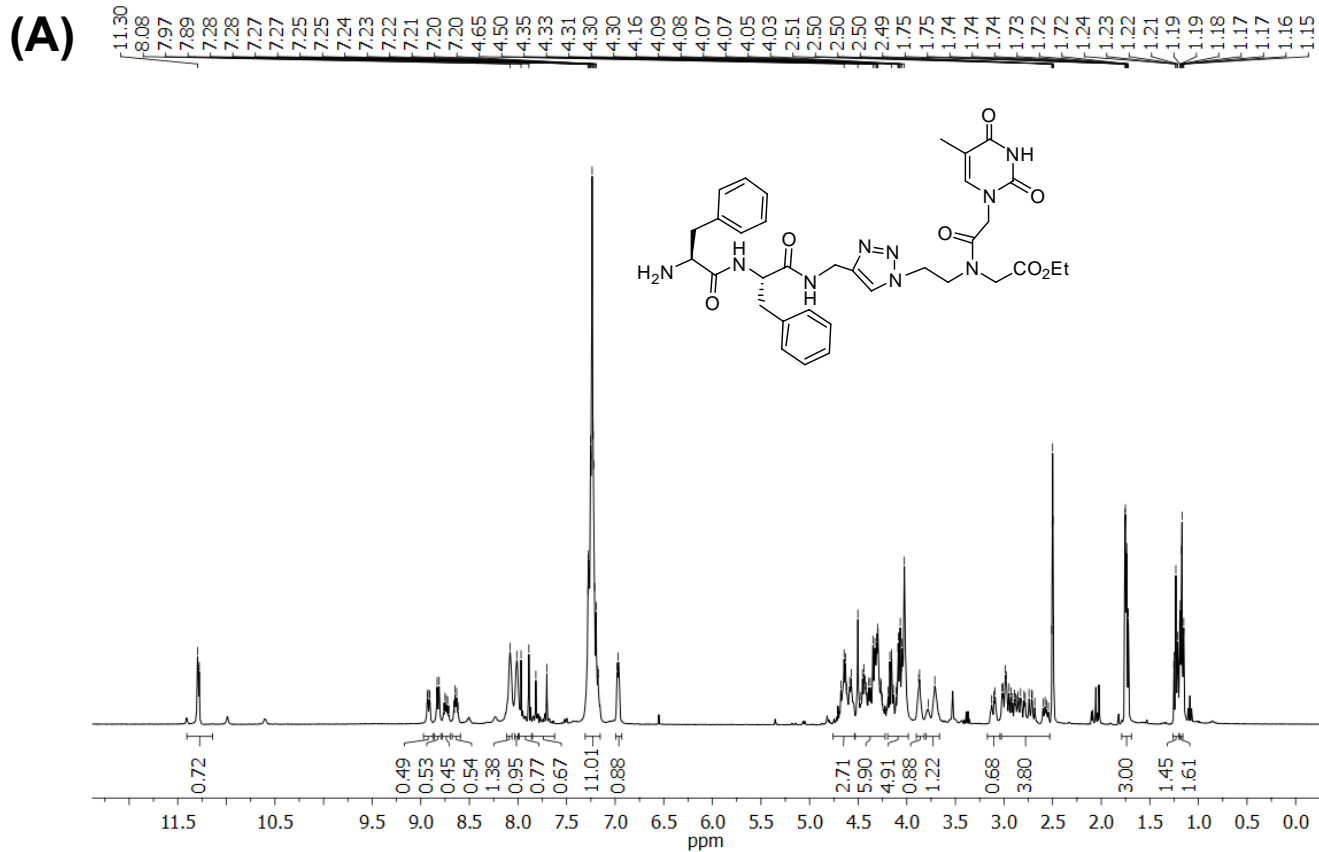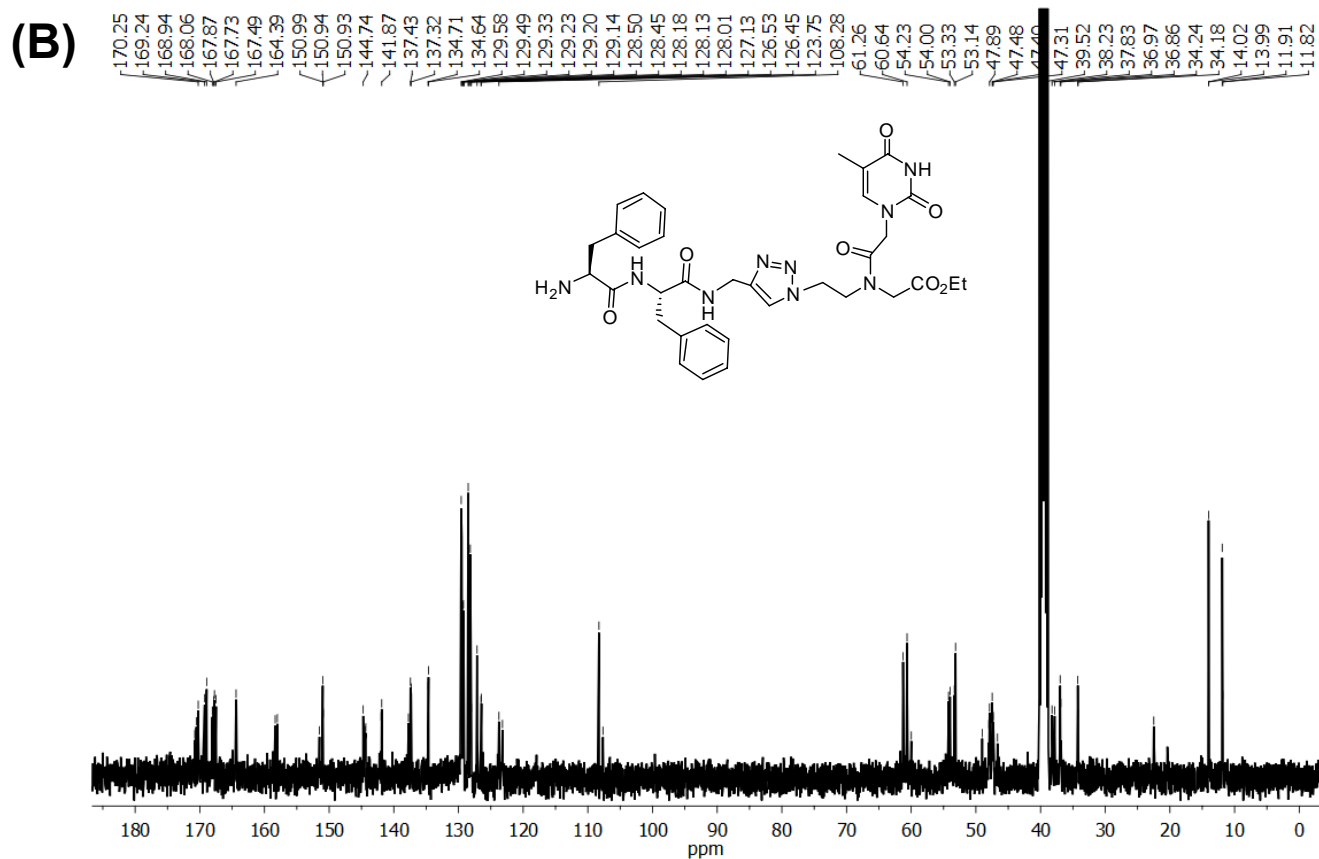

**Figure S36:** (A) <sup>1</sup>H-NMR and (B) <sup>13</sup>C-NMR spectra of nucleopeptide **7d**

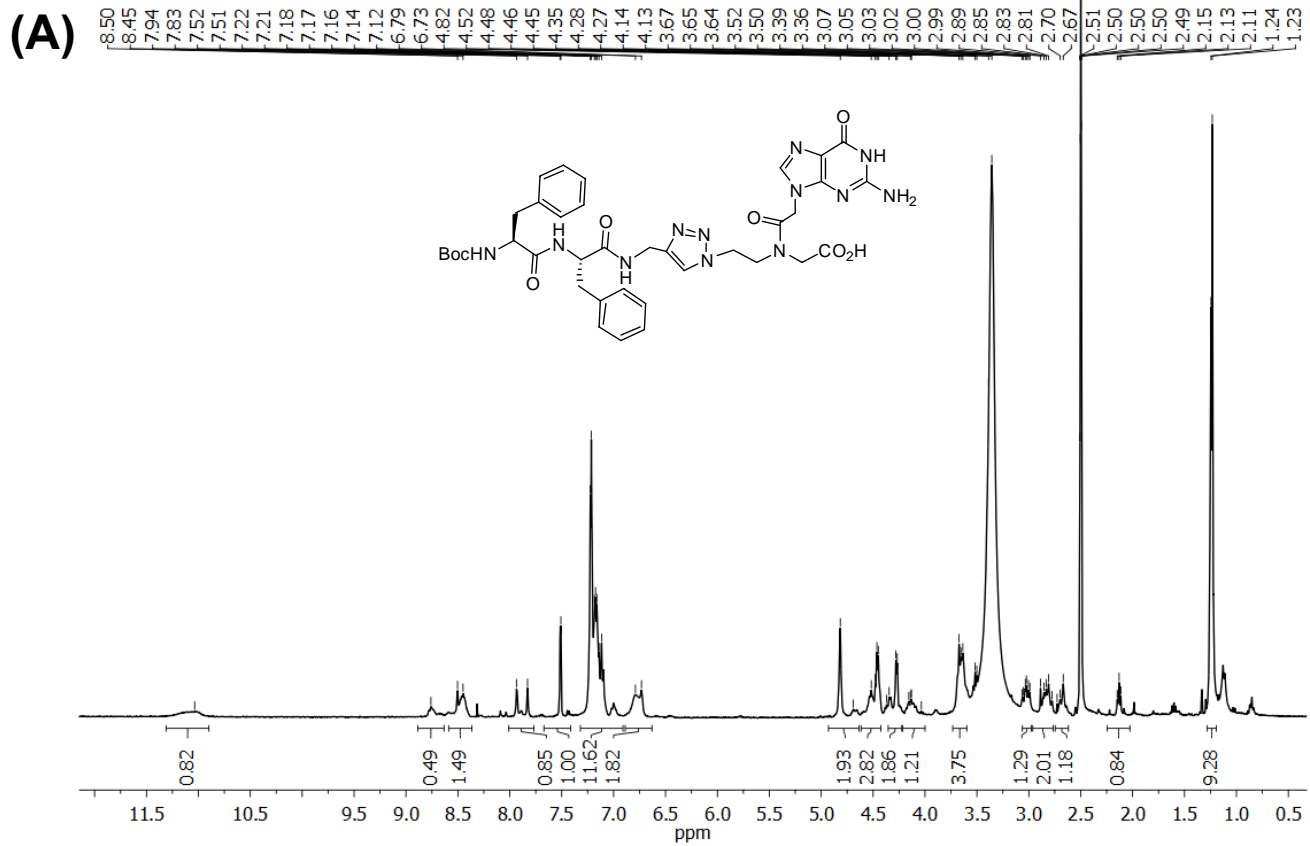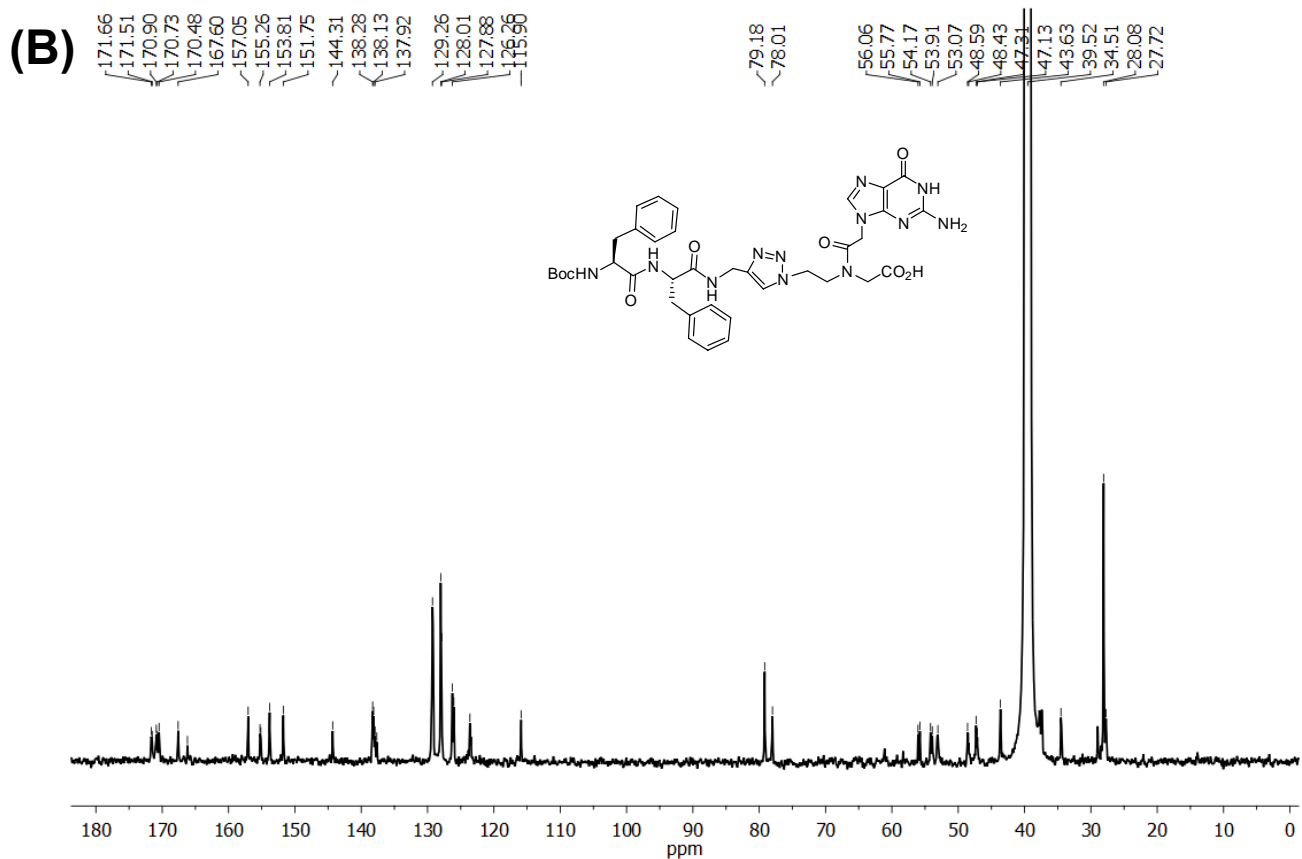

**Figure S37:** (A) <sup>1</sup>H-NMR and (B) <sup>13</sup>C-NMR spectra of nucleopeptide **8c**



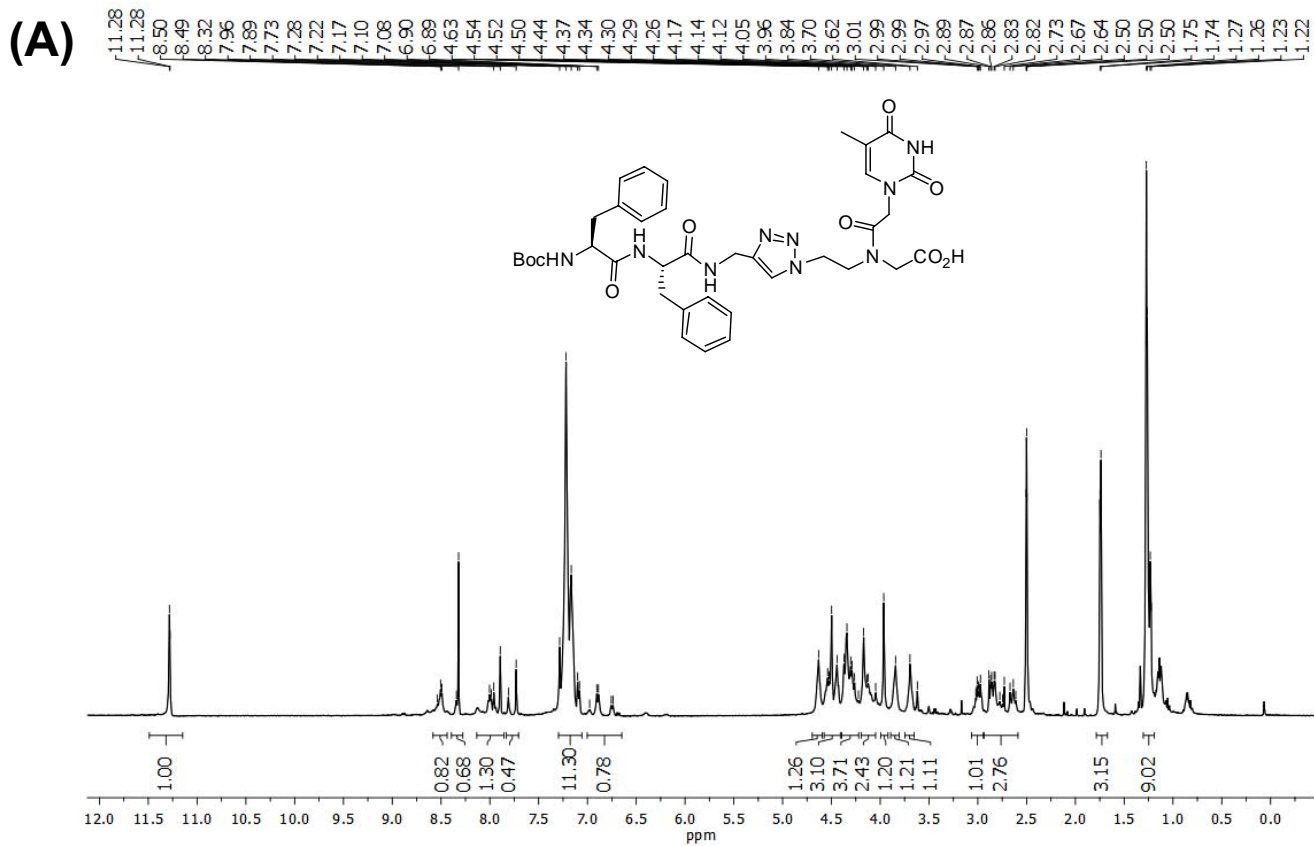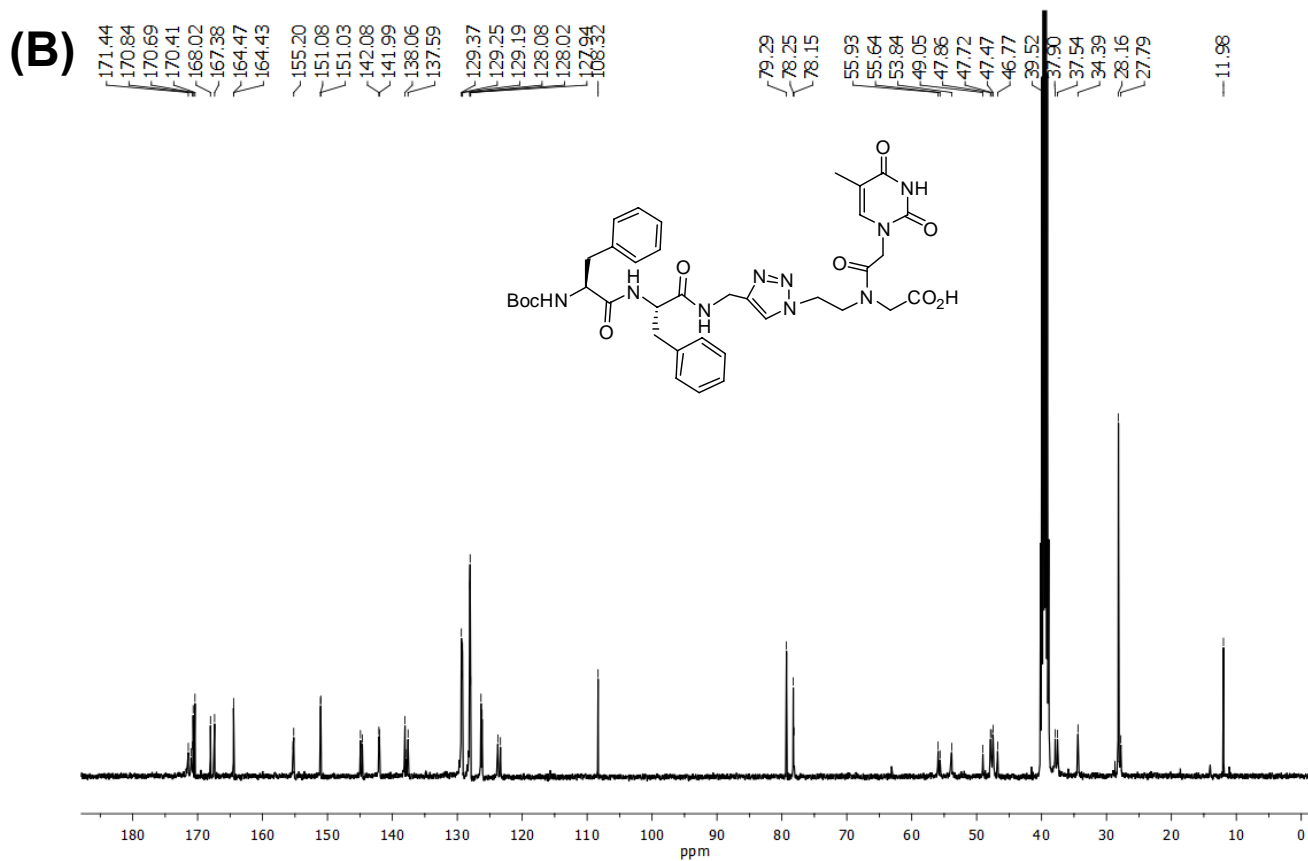

Figure S38: (A)  $^1\text{H-NMR}$  and (B)  $^{13}\text{C-NMR}$  spectra of peptide **8d**

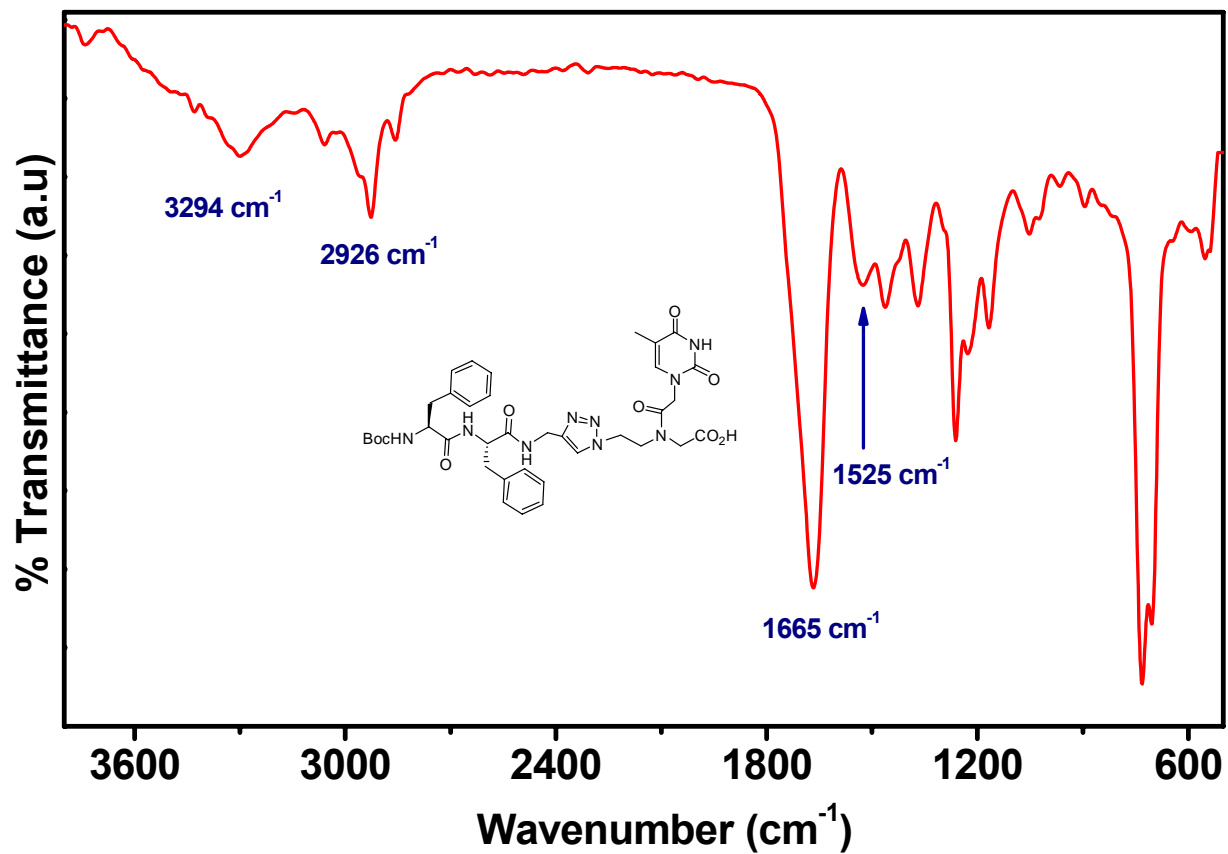

Figure S39: FTIR spectrum of 8d

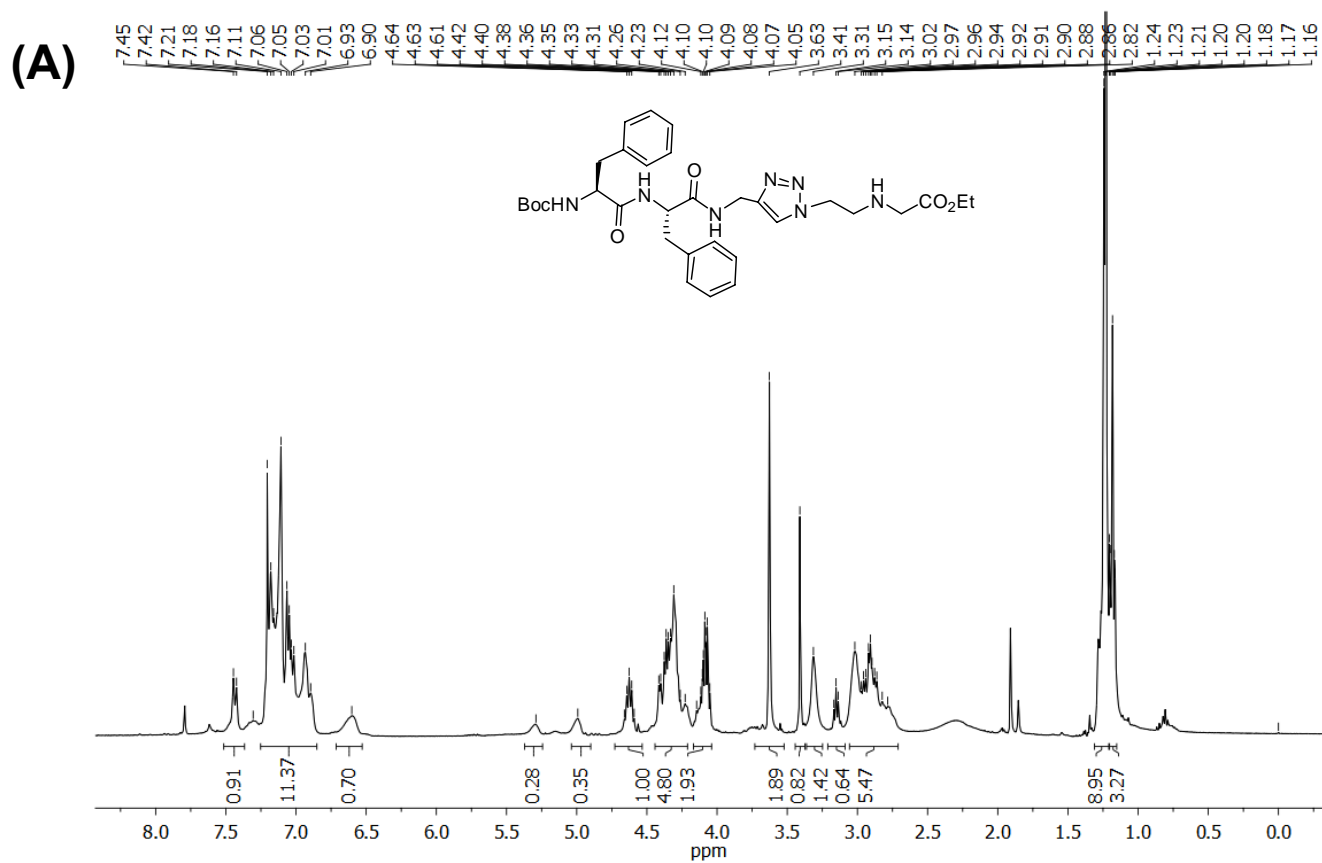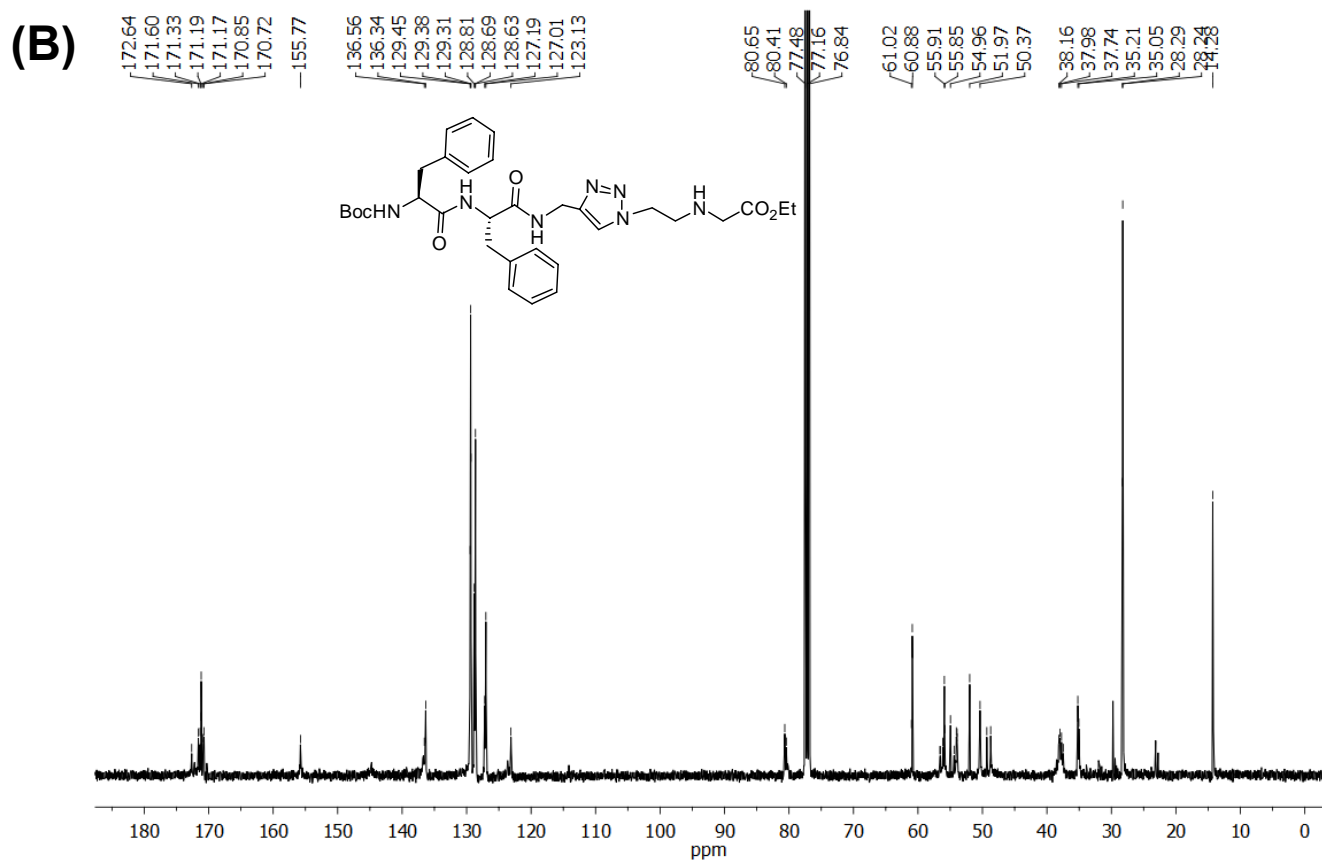

Figure S40: (A) <sup>1</sup>H-NMR and (B) <sup>13</sup>C-NMR spectra of **9**

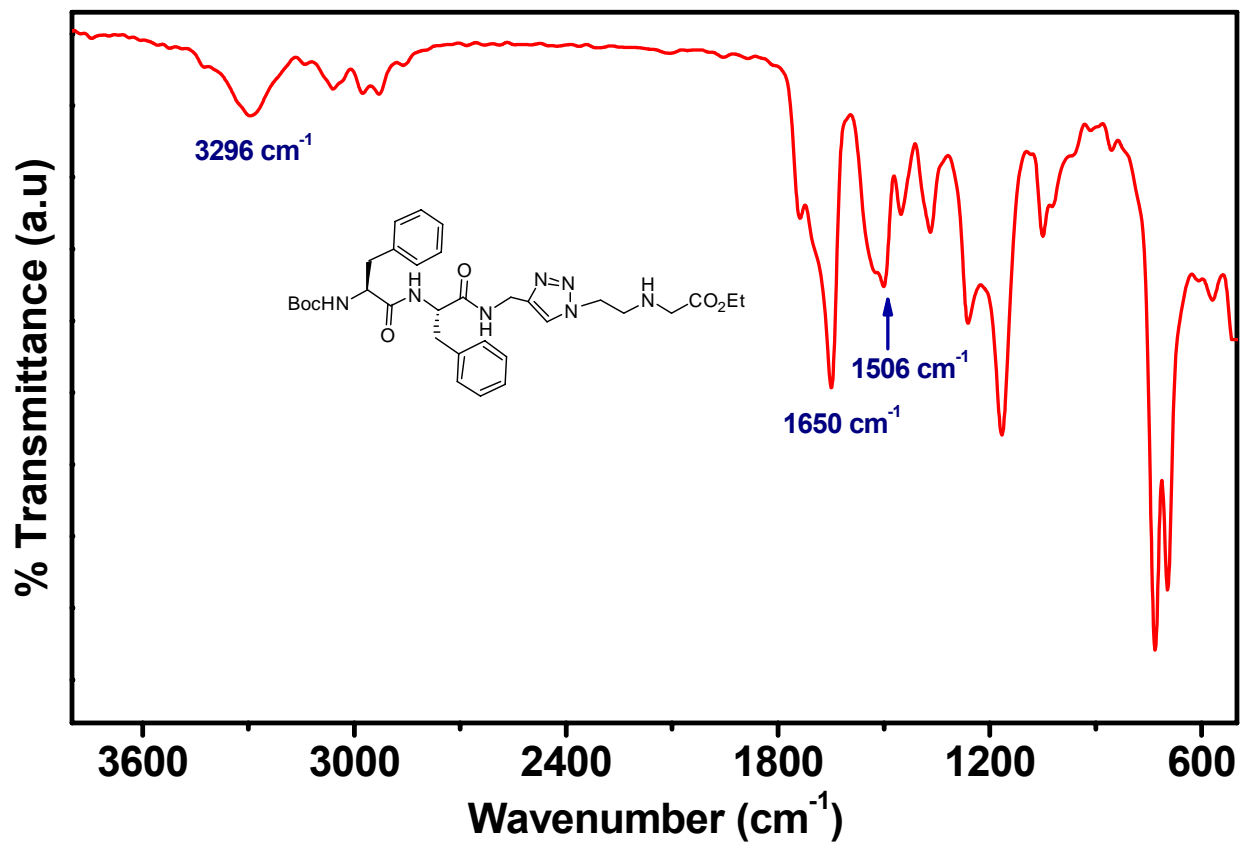

Figure S41: FTIR spectrum of 9

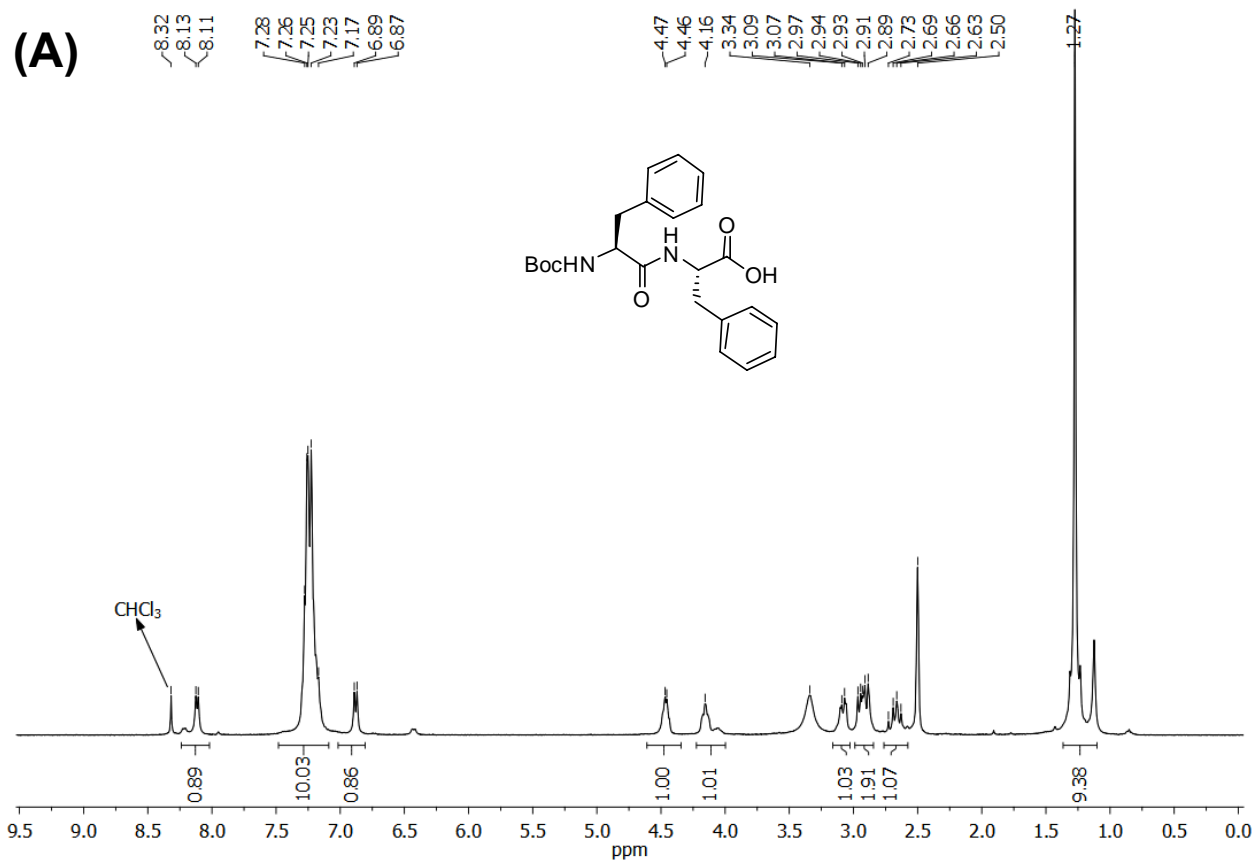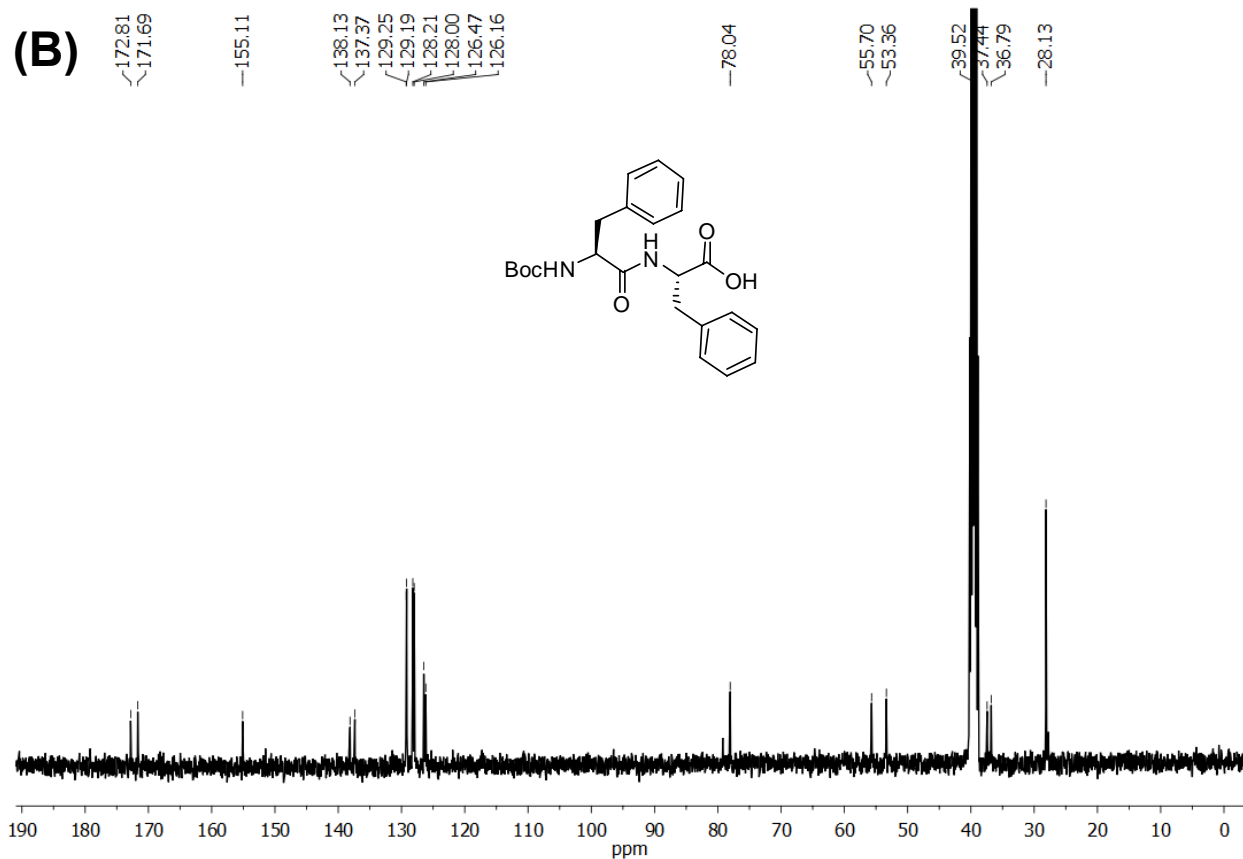

**Figure S42:** (A)  $^1\text{H}$ -NMR and (B)  $^{13}\text{C}$  NMR of **Boc-Phe-Phe-OH** (in  $\text{DMSO-d}_6$ )

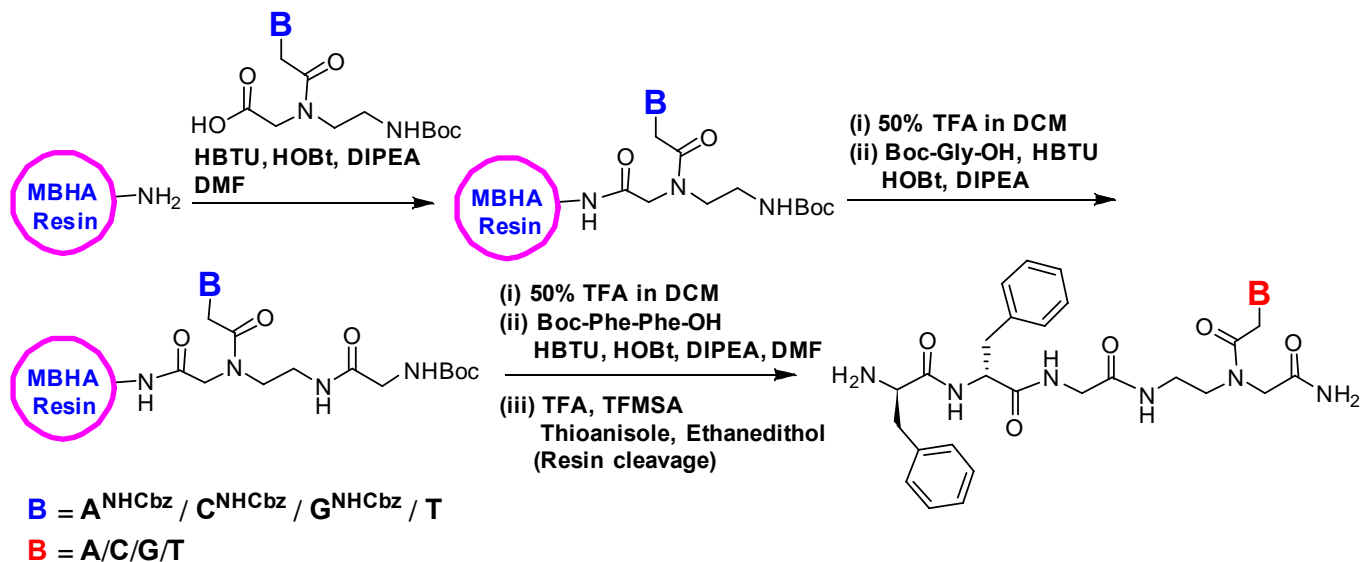

**Scheme S3:** Synthesis of nucleopeptides through solid support.

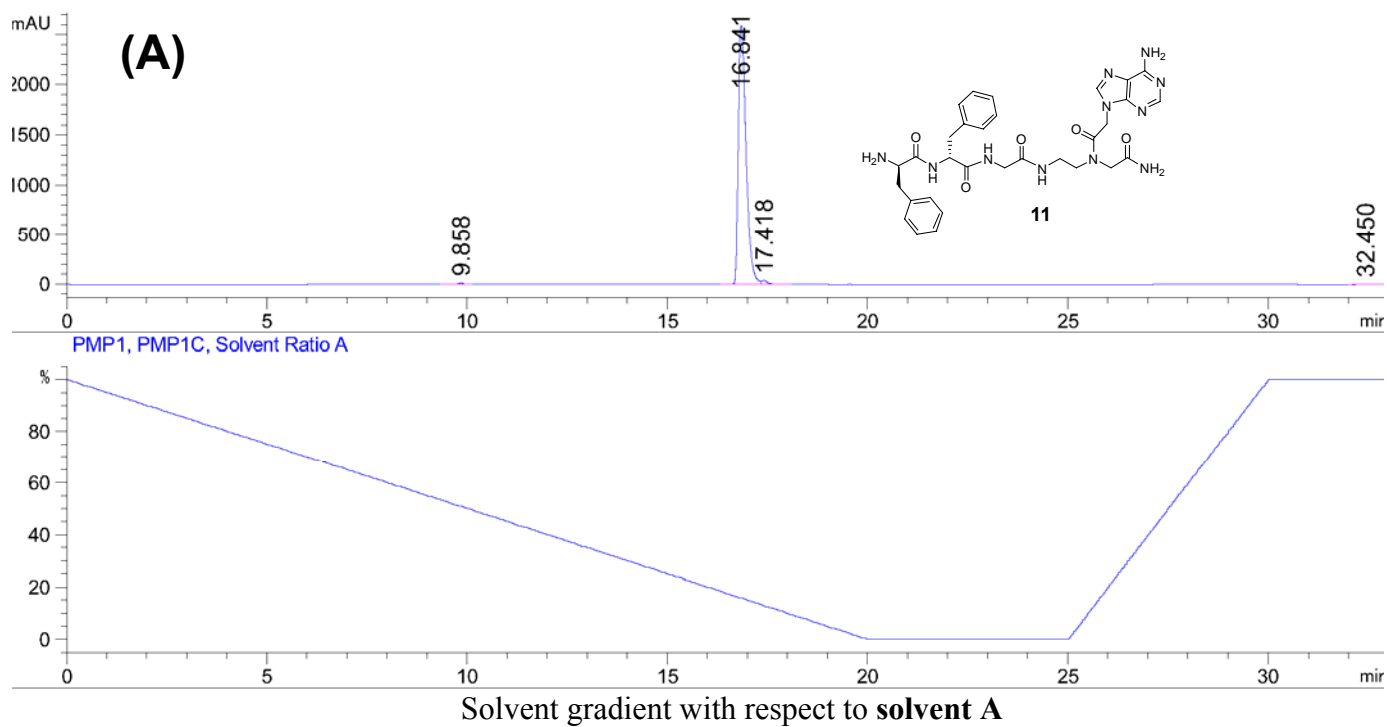

[Solvent A: 95% water, 4.5% acetonitrile, 0.5% TFA; Solvent B: 49.5% water, 50% acetonitrile, 0.5% TFA]

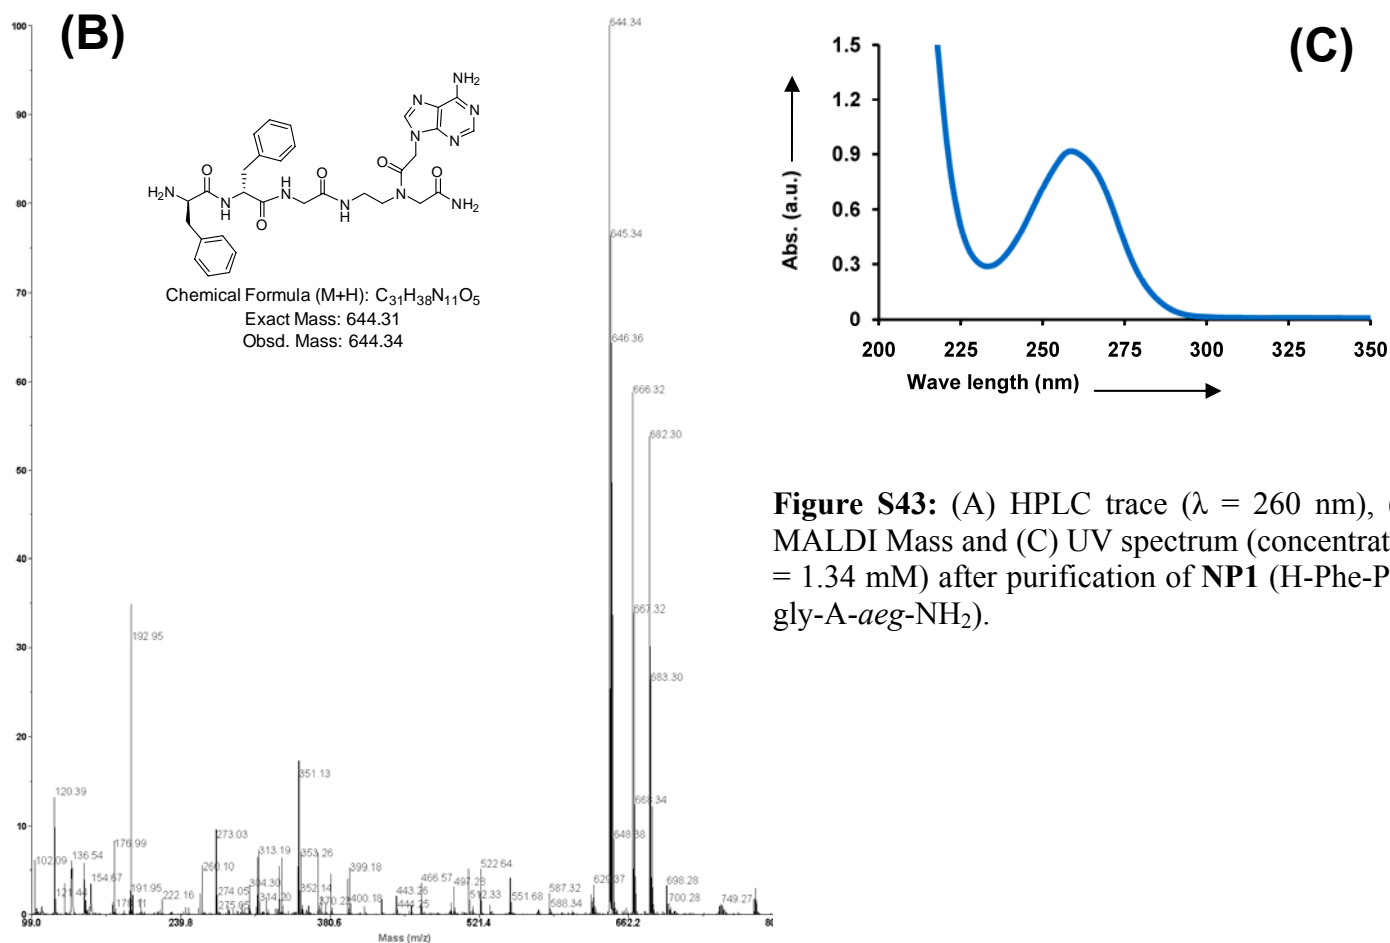

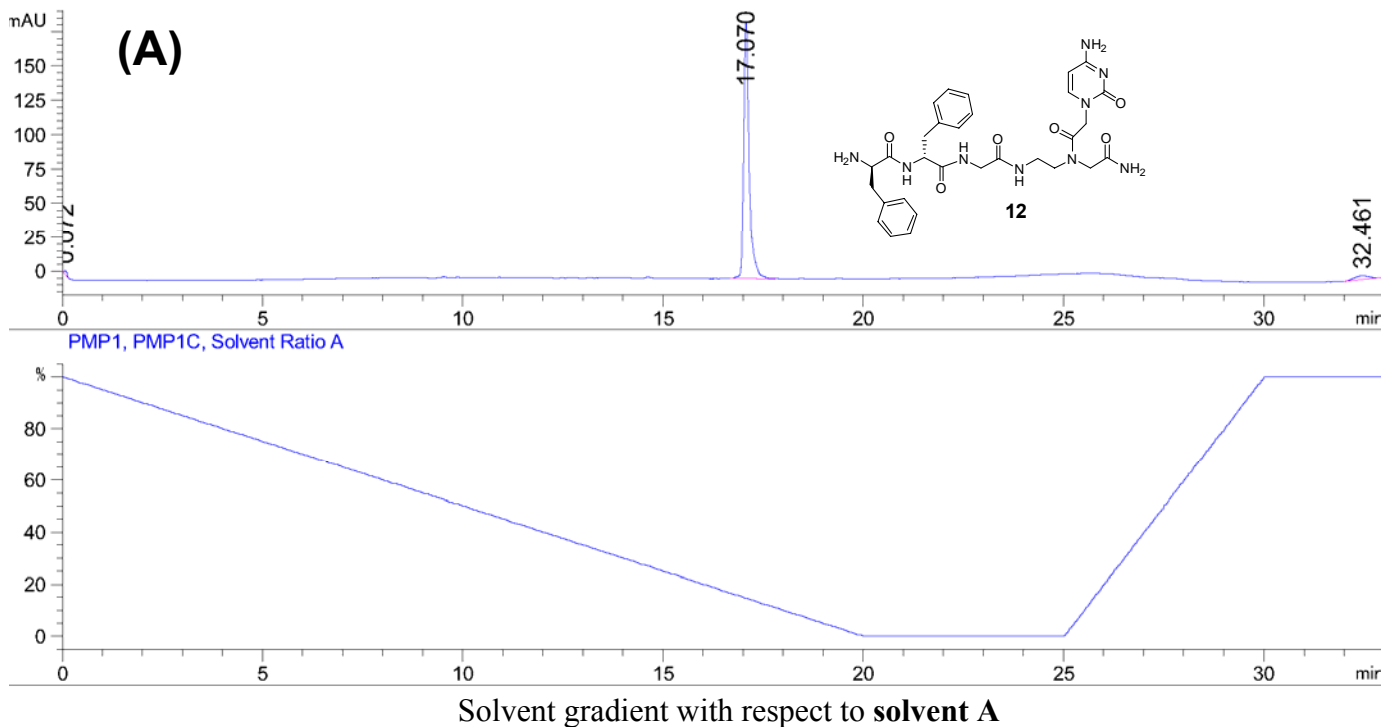

[Solvent A: 95% water, 4.5% acetonitrile, 0.5% TFA; Solvent B: 49.5% water, 50% acetonitrile, 0.5% TFA]

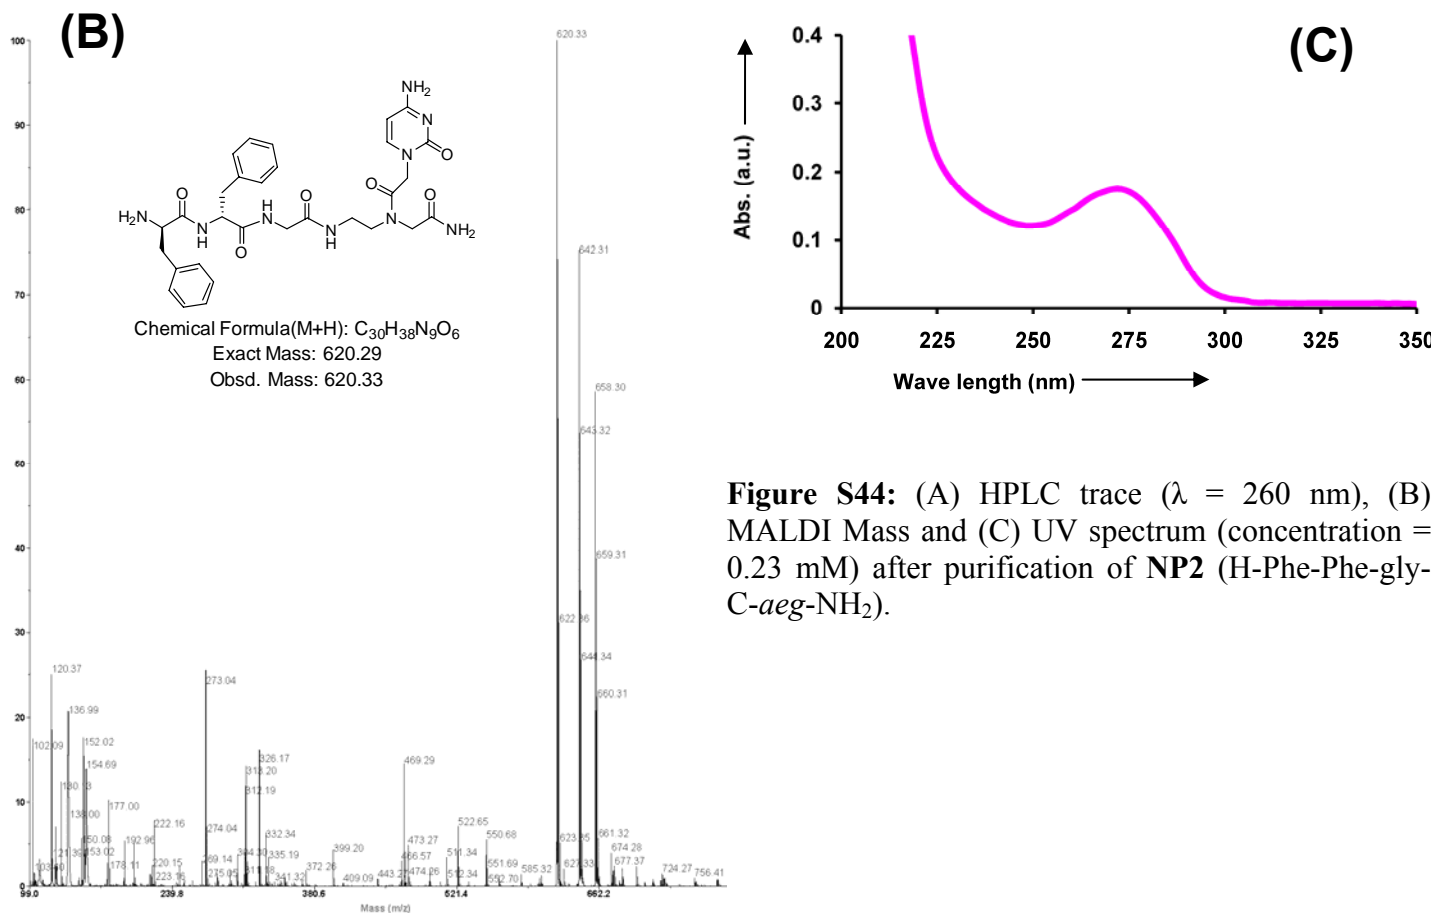

**Figure S44:** (A) HPLC trace ( $\lambda = 260$  nm), (B) MALDI Mass and (C) UV spectrum (concentration = 0.23 mM) after purification of NP2 (H-Phe-Phe-gly-C-aeg-NH<sub>2</sub>).



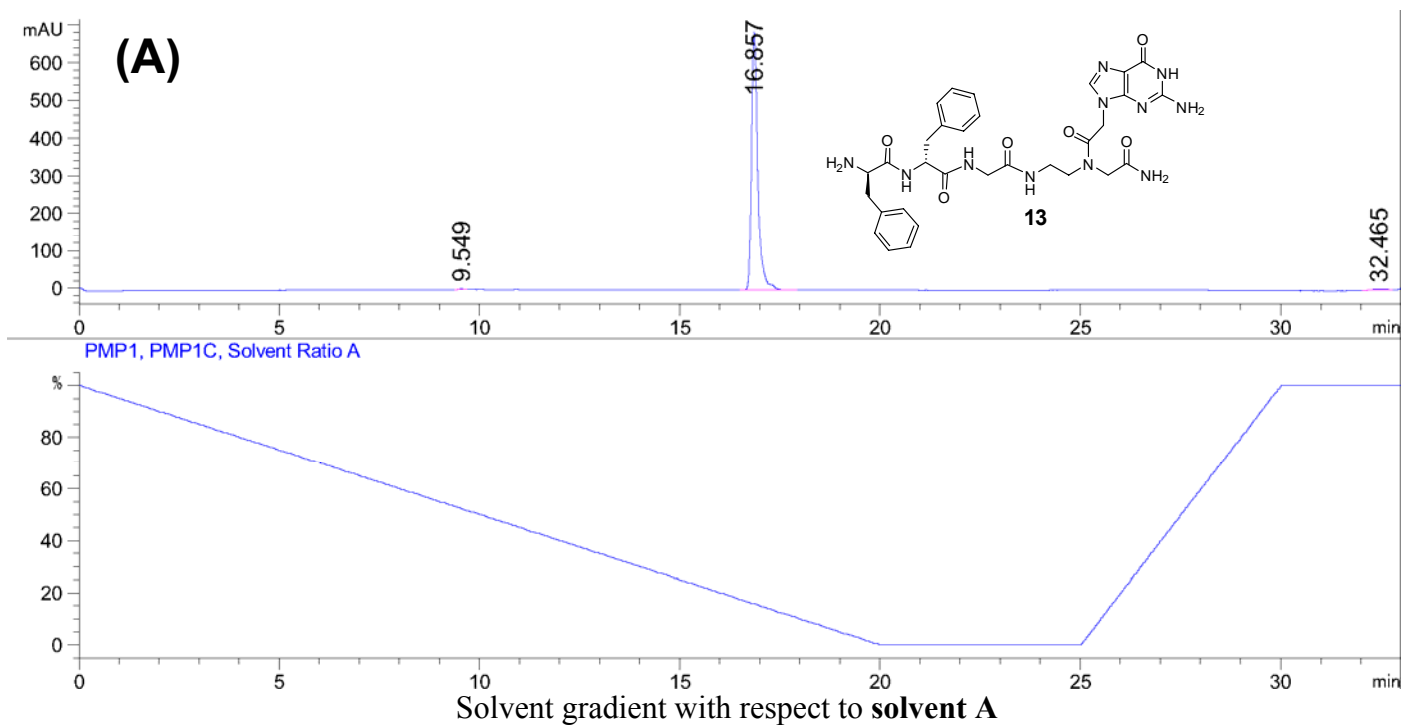

[Solvent A: 95% water, 4.5% acetonitrile, 0.5% TFA; Solvent B: 49.5% water, 50% acetonitrile, 0.5% TFA]

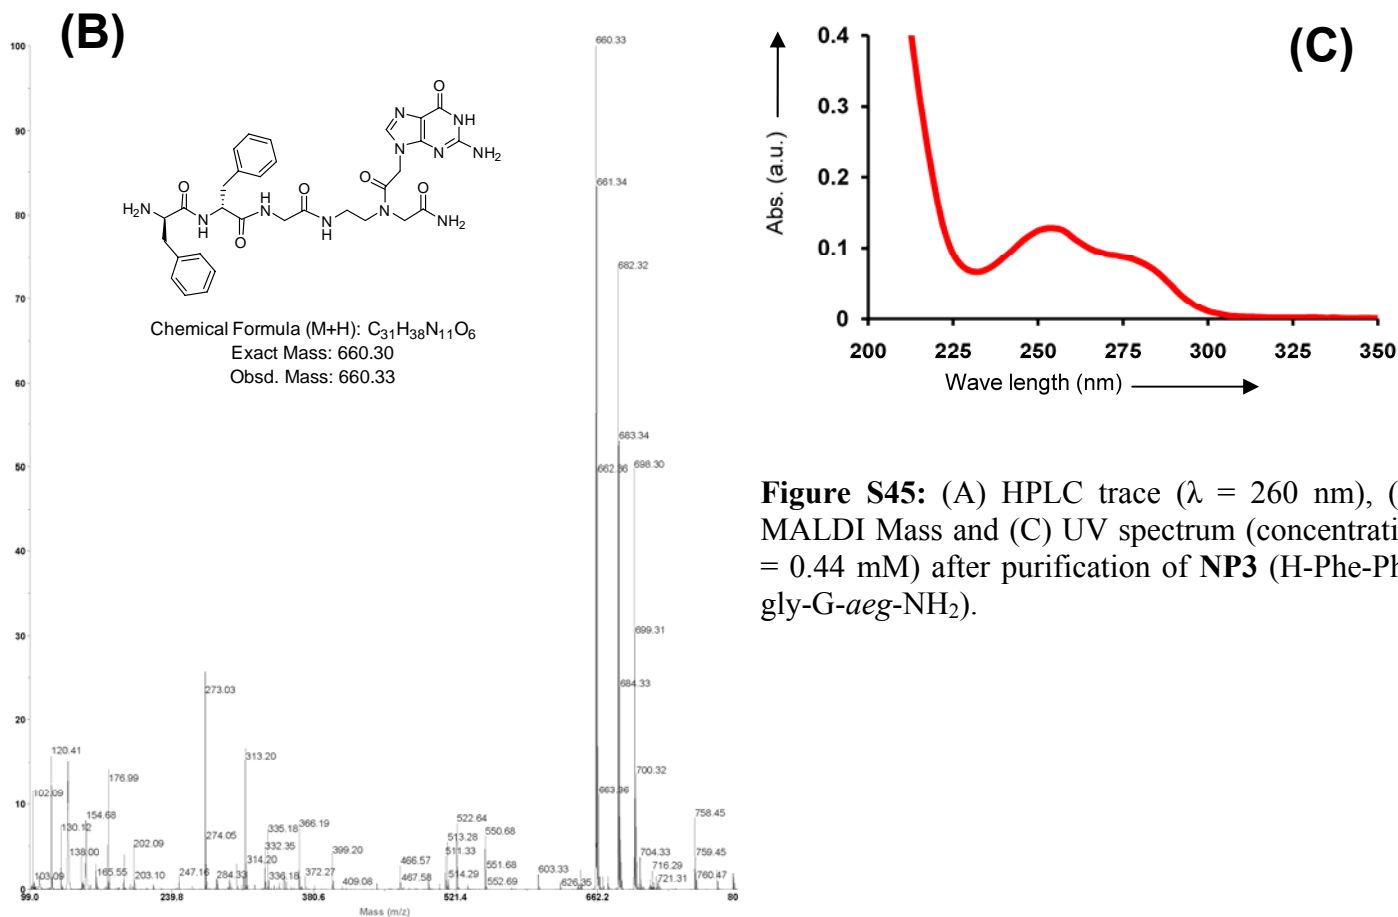

**Figure S45:** (A) HPLC trace ( $\lambda = 260$  nm), (B) MALDI Mass and (C) UV spectrum (concentration = 0.44 mM) after purification of NP3 (H-Phe-Phe-gly-G-aeg-NH<sub>2</sub>).

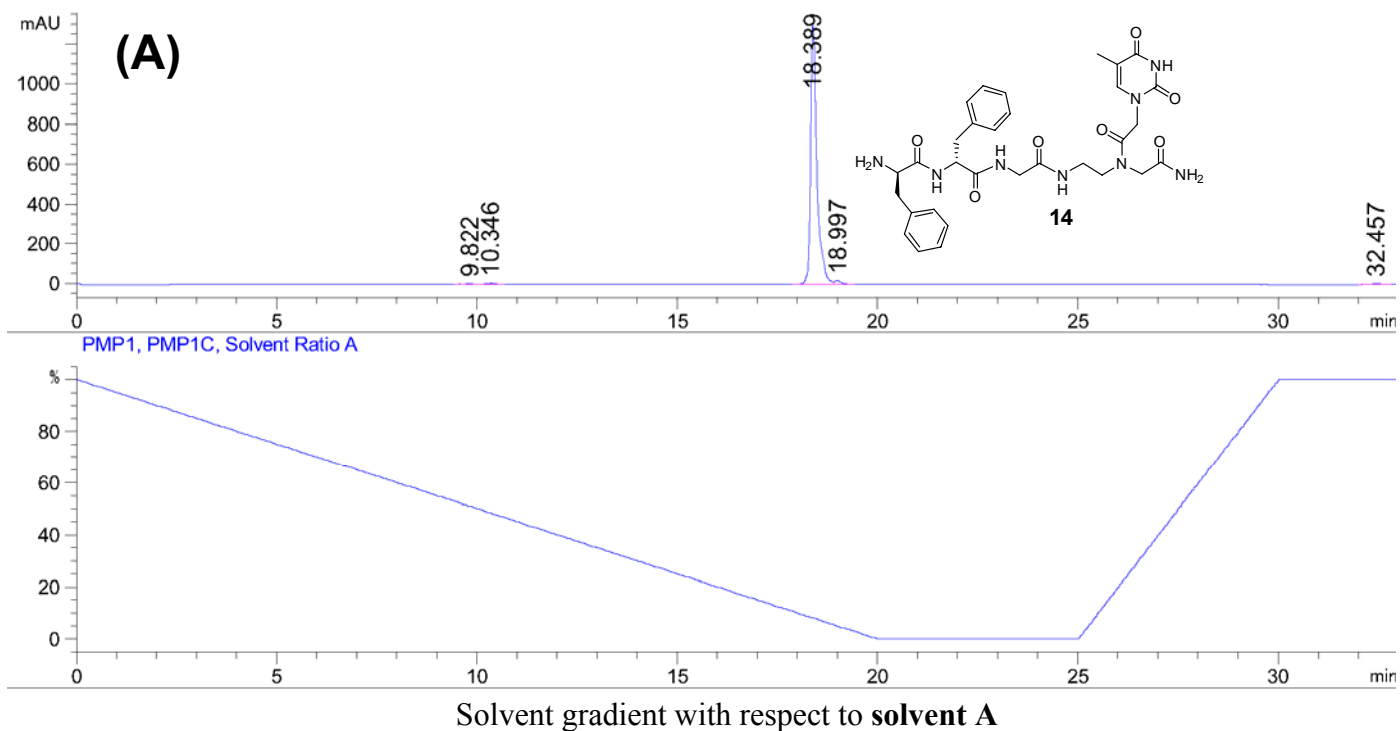

[Solvent A: 95% water, 4.5% acetonitrile, 0.5% TFA; Solvent B: 49.5% water, 50% acetonitrile, 0.5% TFA]

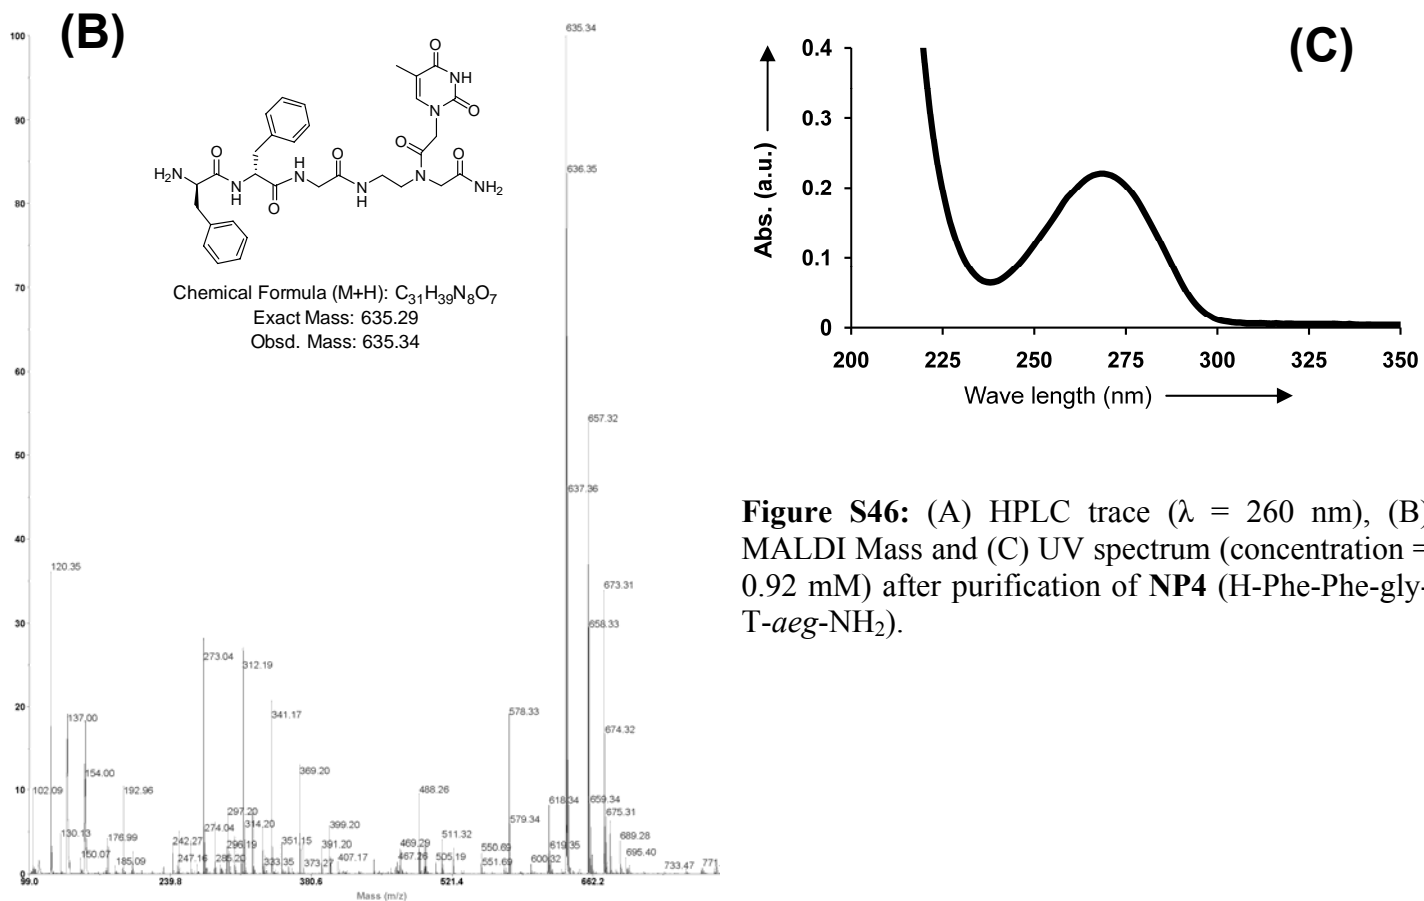

**Figure S46:** (A) HPLC trace ( $\lambda = 260$  nm), (B) MALDI Mass and (C) UV spectrum (concentration = 0.92 mM) after purification of **NP4** (H-Phe-Phe-gly-T-*ae*-NH<sub>2</sub>).

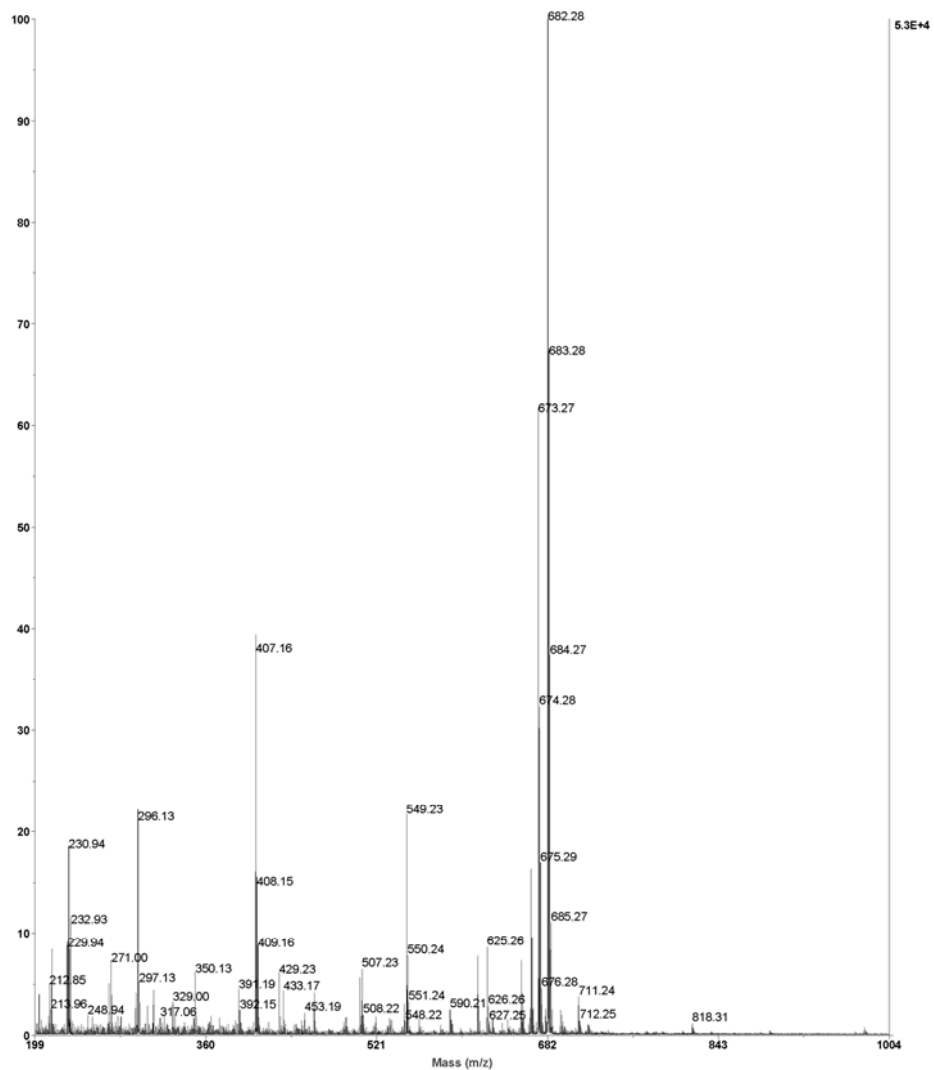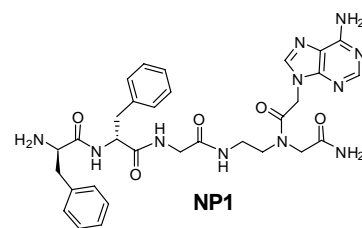

Chemical Formula (M+K):  $C_{31}H_{37}N_{11}O_5K$

Exact Mass: 682.26

Obsd. Mass: 682.28

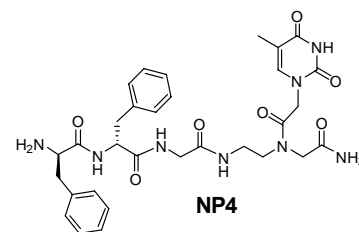

Chemical Formula (M+K):  $C_{31}H_{37}N_8O_7K$

Exact Mass: 673.25

Obsd. Mass: 673.27

**Figure S47: MALDI-Tof data of NP1 and NP4 duplex**

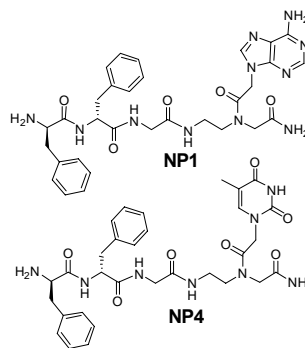

Chemical Formula of Duplex (M+H):  $C_{62}H_{76}N_{19}O_{12}$

Calcd. Duplex Mass: 1278.5921

Obsd. Mass: 1278.5879

Error: -3.3 ppm

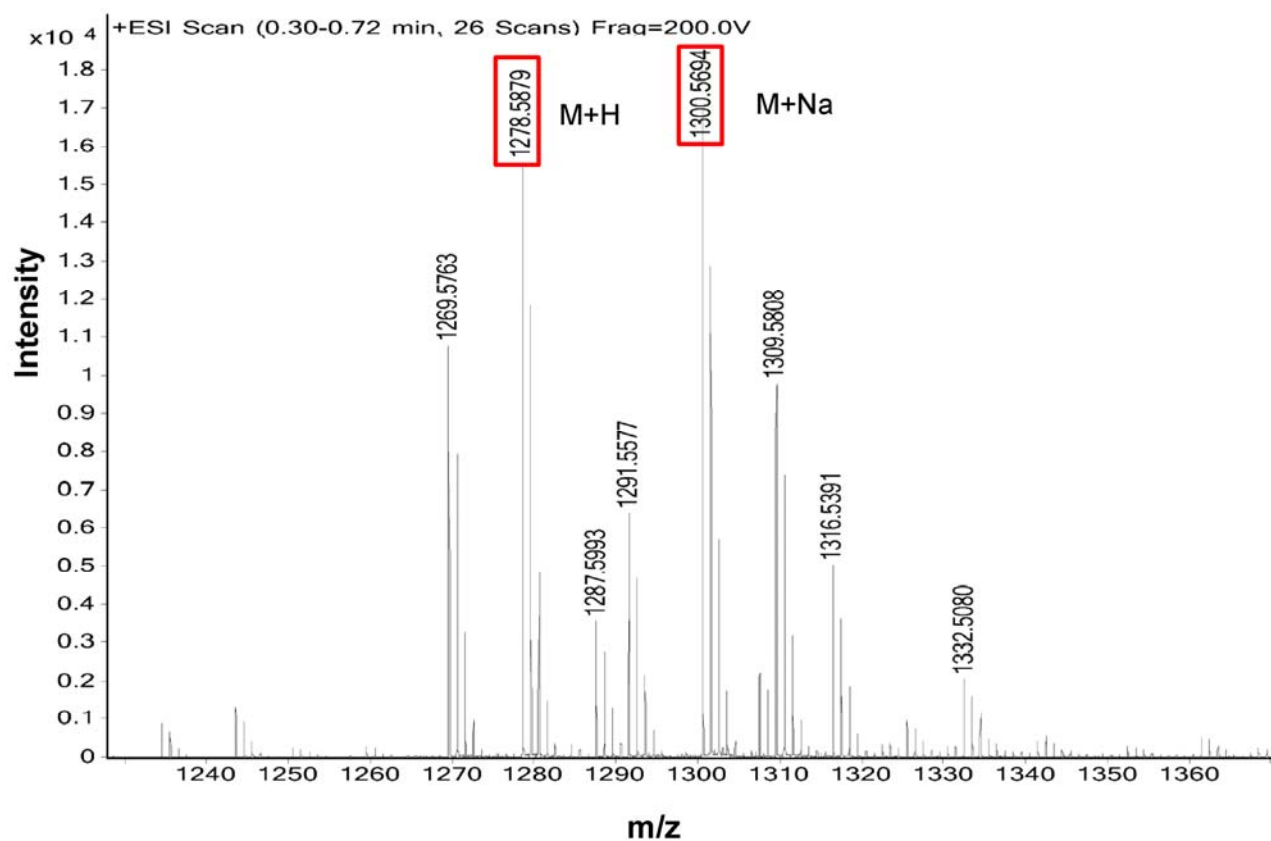

Figure S48: ESI mass data of NP1 and NP4 duplex

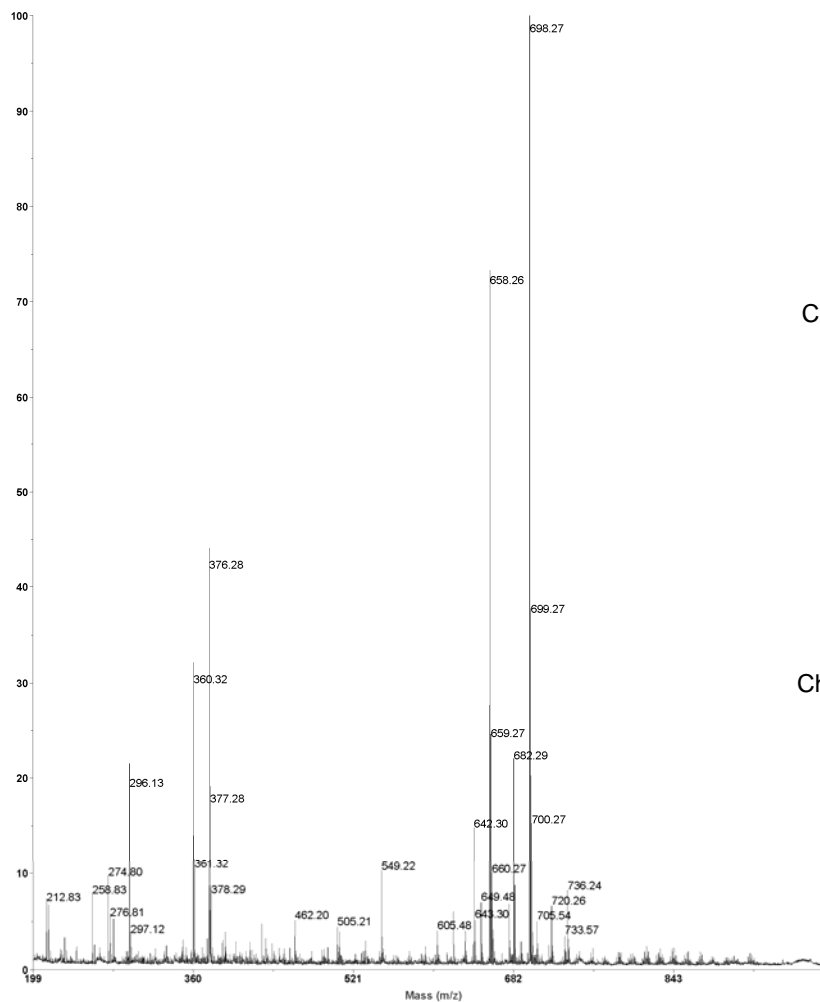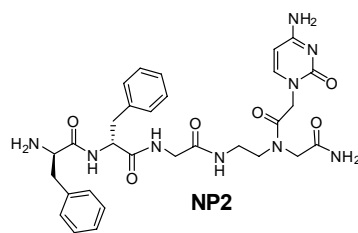

Chemical Formula(M+K):  $C_{30}H_{37}N_9O_6K$   
 Exact Mass: 658.25  
 Obsd. Mass: 658.26

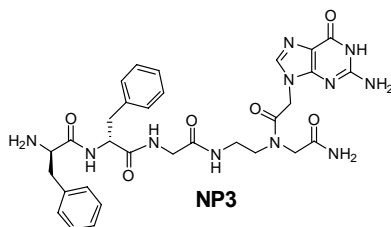

Chemical Formula (M+K):  $C_{31}H_{37}N_{11}O_6K$   
 Exact Mass: 698.26  
 Obsd. Mass: 698.27

**Figure S49:** MALDI-Tof data of NP2 and NP3 duplex

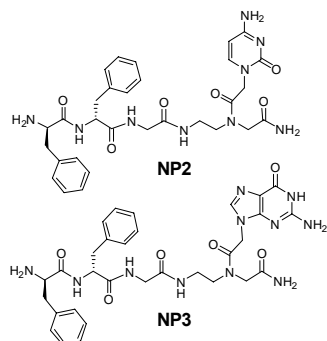

Chemical Formula of Duplex (M+H):  $C_{61}H_{75}N_{20}O_{12}$

Calcd. Duplex Mass: 1279.5873

Obsd. Mass: 1279.5886

Error: -1.3 ppm

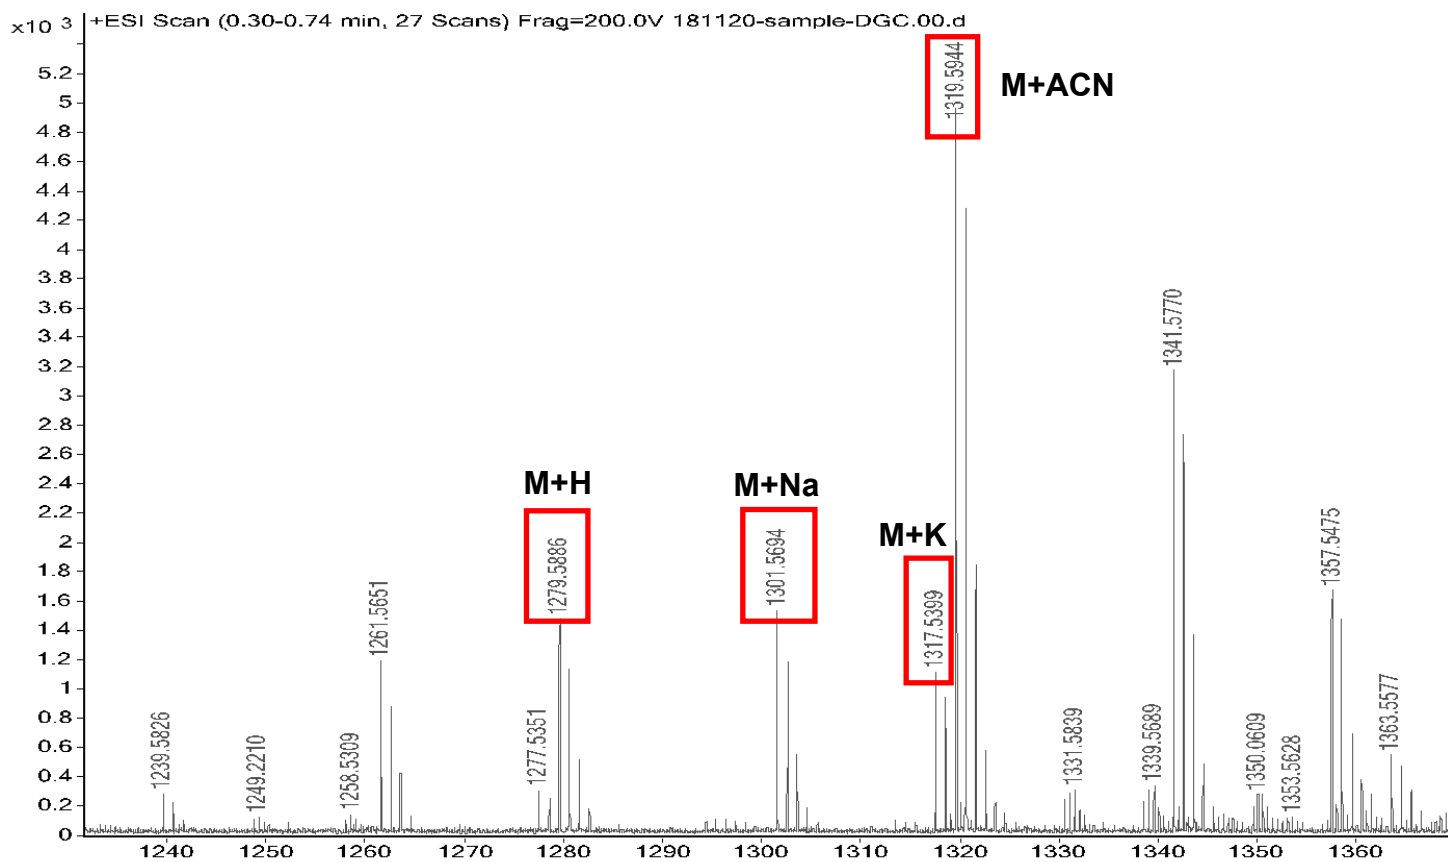

Figure S50: ESI mass data of NP2 and NP3 duplex

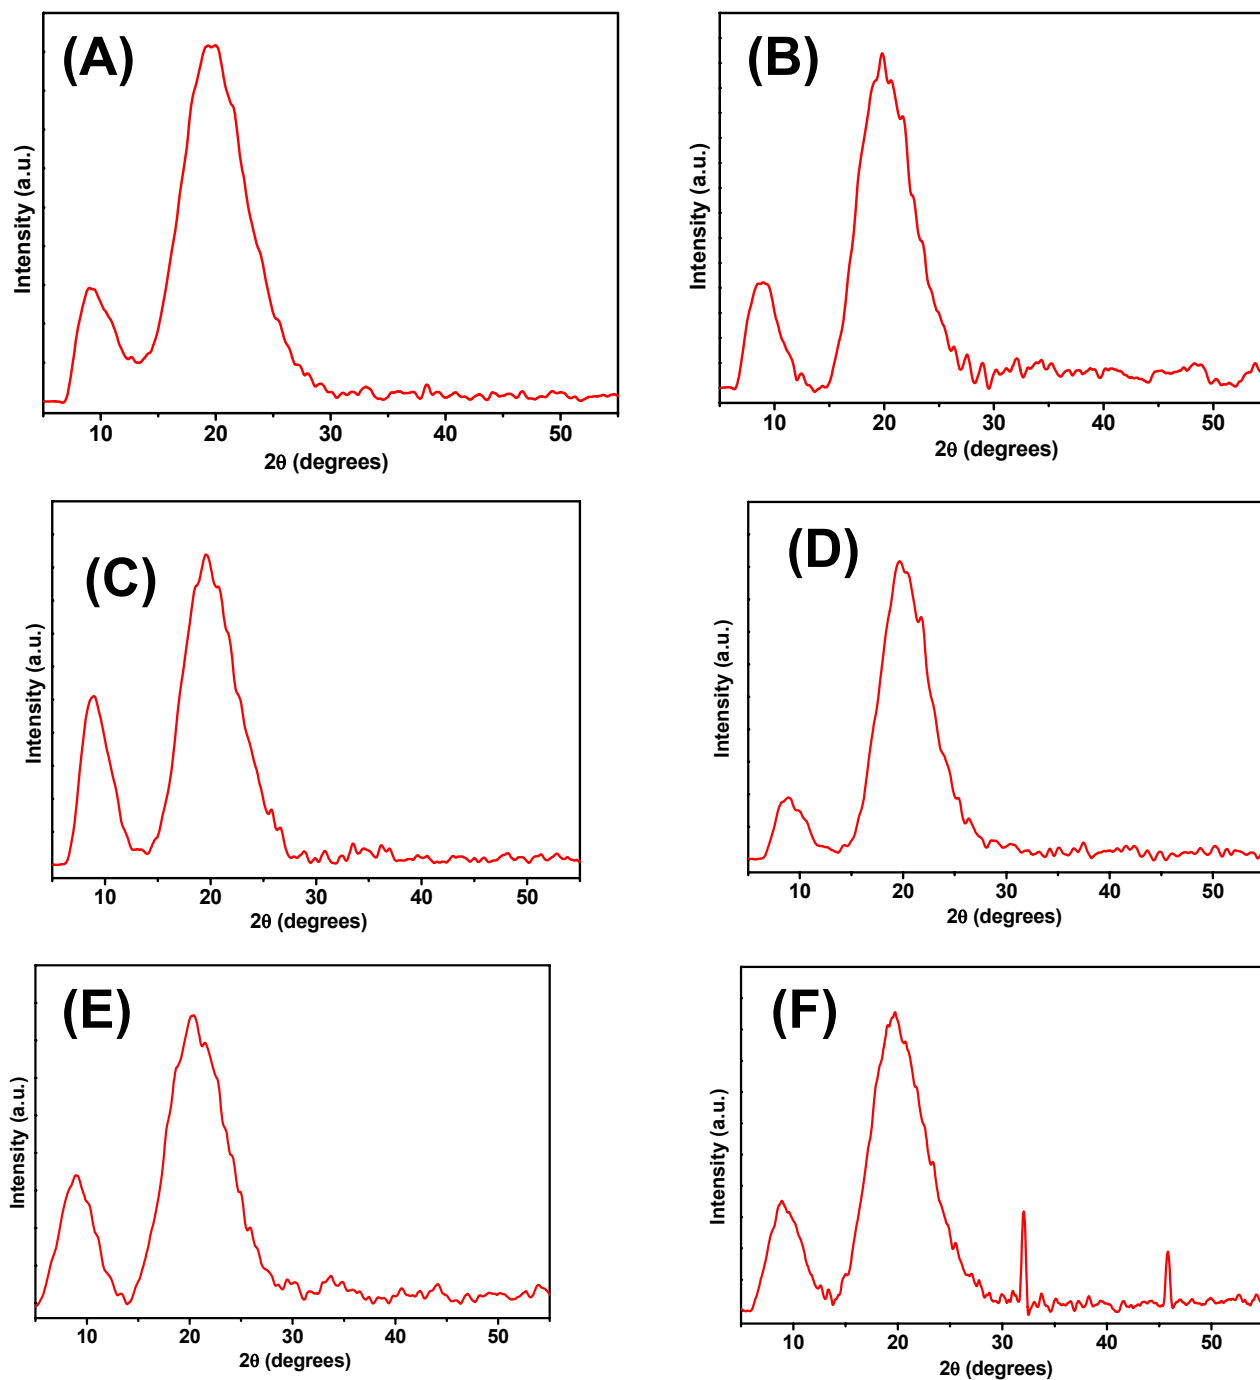

**Figure S51:** PXRD patterns of representative nucleopeptides (A) **3b** (Boc-Phe-Phe-*am*-6-Cl- $G^{\text{NHIBu}}$ -*aeg*-OEt), (B) **3c** (Boc-Phe-Phe-*am*- $G^{\text{NHIBu}}$ -*aeg*-OEt), (C) **3d** (Boc-Phe-Phe-*am*-T-*aeg*-OEt), (D) **6c** (Boc-Phe-Phe-*tz*- $G^{\text{NHIBu}}$ -*aeg*-OEt), (E) **7d** (H-Phe-Phe-*tz*-T-*aeg*-OEt) and (F) **8d** (Boc-Phe-Phe-*tz*-T-*aeg*-OH).

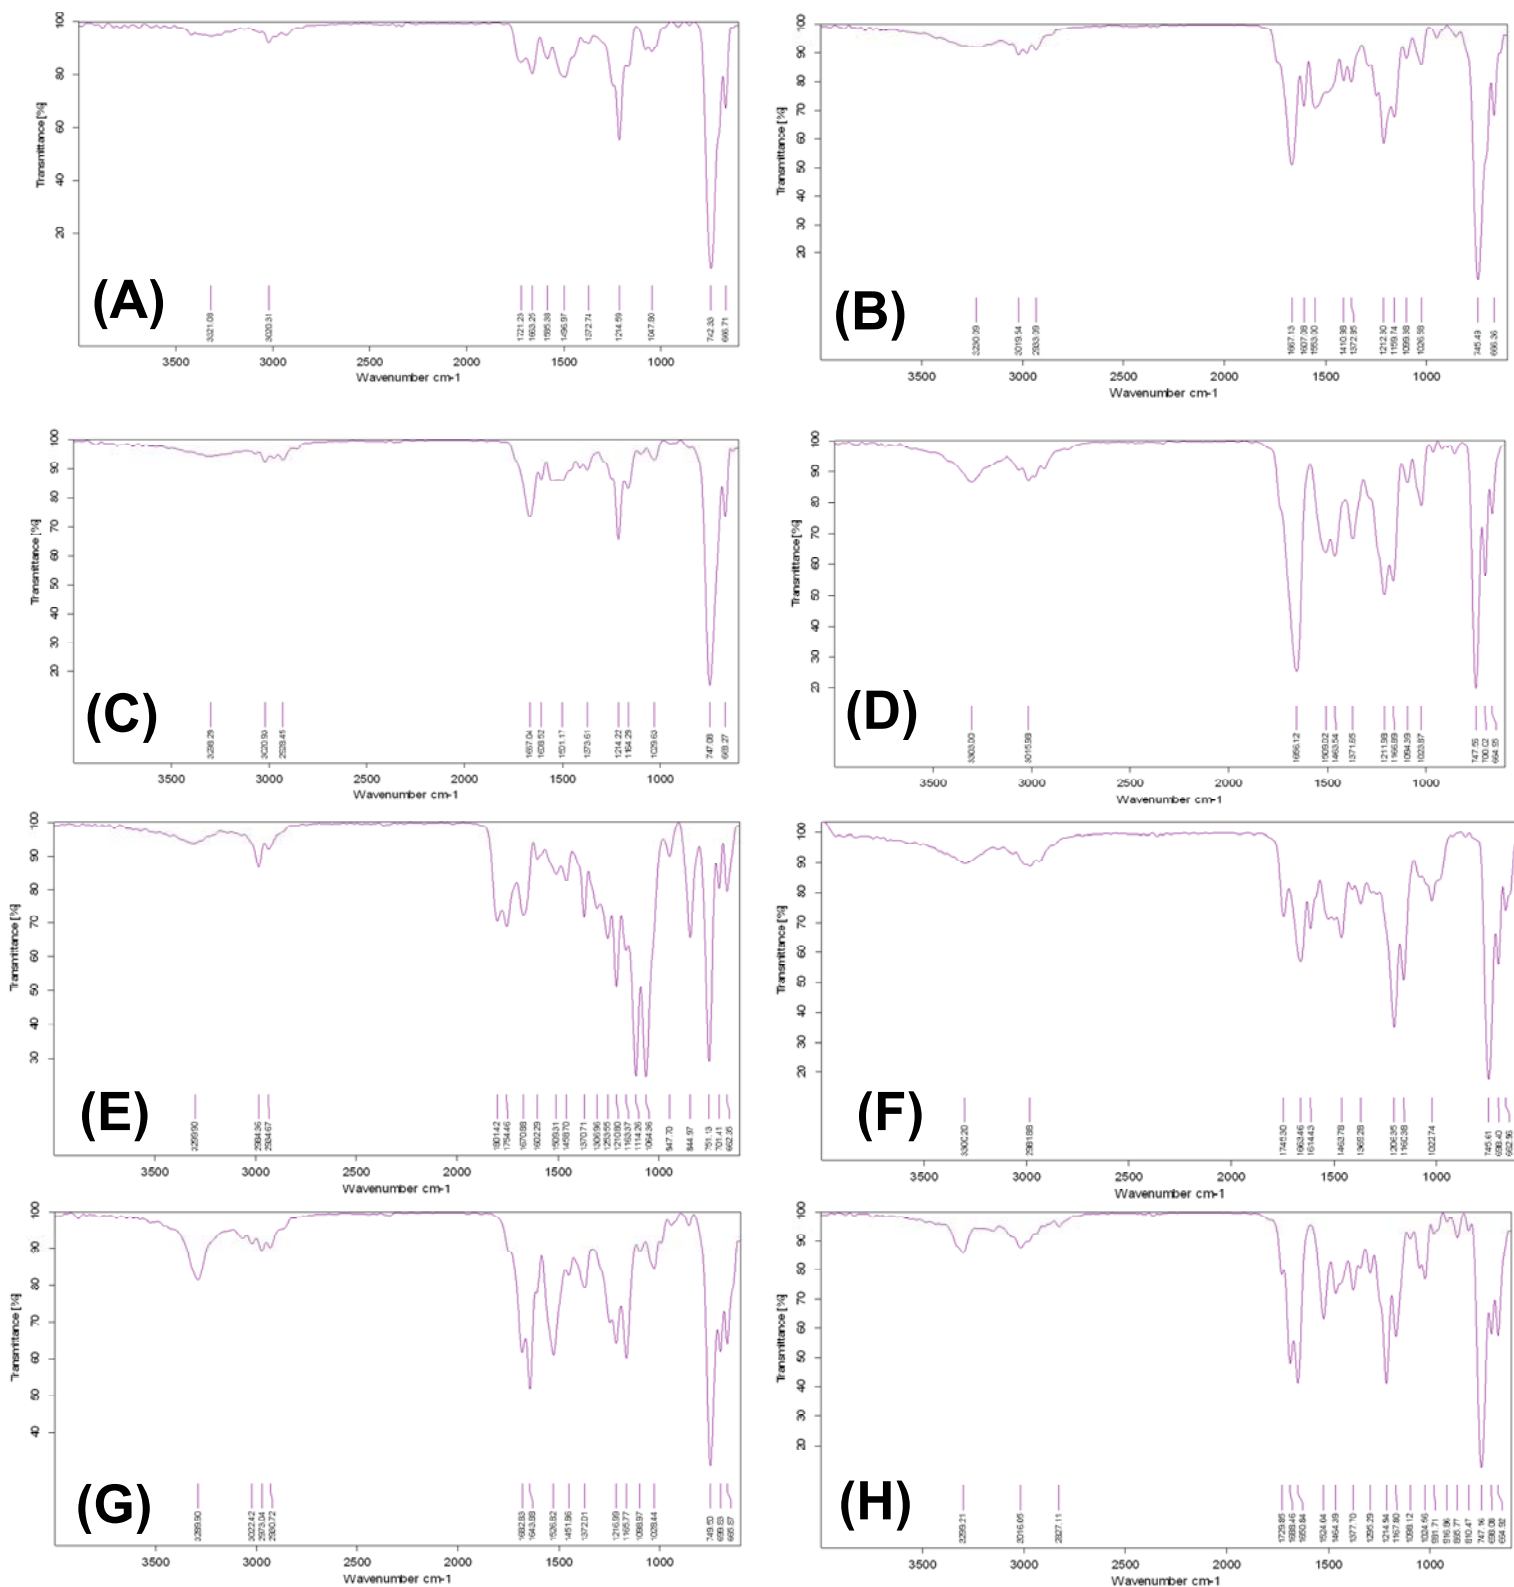

**Figure S52:** FTIR spectra of peptide (A) **3a** (Boc-Phe-Phe-*am*-A<sup>NHCbz</sup>-*aeg*-OEt), (B) **3b** (Boc-Phe-Phe-*am*-6-Cl-G<sup>NHiBu</sup>-*aeg*-OEt), (C) **3c** (Boc-Phe-Phe-*am*-G<sup>NHiBu</sup>-*aeg*-OEt), (D) **3d** (Boc-Phe-Phe-*am*-T-*aeg*-OEt), (E) **6a** (Boc-Phe-Phe-*tz*-A<sup>N(Boc)2</sup>-*aeg*-OEt), (F) **6b** (Boc-Phe-Phe-*tz*-A<sup>NHCbz</sup>-*aeg*-OEt), (G) **6c** (Boc-Phe-Phe-*tz*-G<sup>NHiBu</sup>-*aeg*-OEt) and (H) **6d** (Boc-Phe-Phe-*tz*-T-*aeg*-OEt).



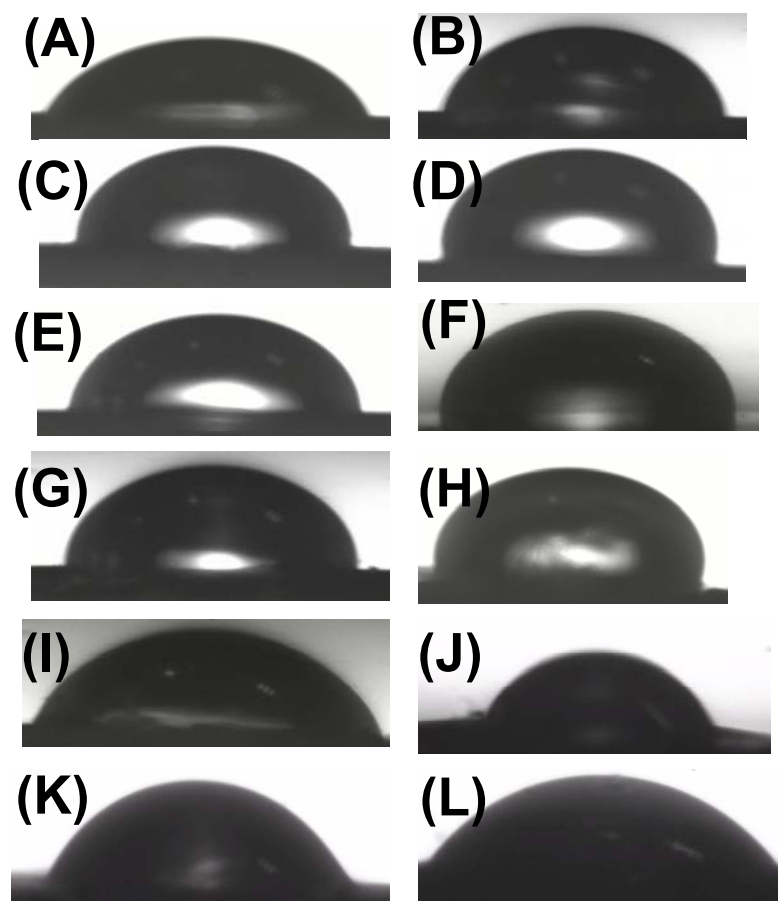

**Figure S53:** Images captured at 0.5 second for contact angle measurement of (A) bare silicon-wafer, (B) peptide **3a** (Boc-Phe-Phe-*am*-A<sup>NHCbz</sup>-*aeg*-OEt), (C) peptide **3b** (Boc-Phe-Phe-*am*-6-Cl-G<sup>NHiBu</sup>-*aeg*-OEt), (D) peptide **3c** (Boc-Phe-Phe-*am*-G<sup>NHiBu</sup>-*aeg*-OEt), (E) peptide **3d** (Boc-Phe-Phe-*am*-T-*aeg*-OEt), (F) peptide **6a** (Boc-Phe-Phe-*tz*-A<sup>N(Boc)<sub>2</sub></sup>-*aeg*-OEt), (G) peptide **6b** (Boc-Phe-Phe-*tz*-A<sup>NHCbz</sup>-*aeg*-OEt), (H) peptide **6c** (Boc-Phe-Phe-*tz*-G<sup>NHiBu</sup>-*aeg*-OEt), (I) peptide **6d** (Boc-Phe-Phe-*tz*-T-*aeg*-OEt), (J) peptide **7d** (H-Phe-Phe-*tz*-T-*aeg*-OEt), (K) peptide **8d** (Boc-Phe-Phe-*tz*-T-*aeg*-OH) and (L) peptide **9** (Boc-Phe-Phe-*tz*-*aeg*-OEt).

**Table S1:** Contact angle (CA) measured for peptides on glass surface

| Sample/Surface                                                                              | CA (in degree) <sup>a</sup> | ΔCA (in degree) |
|---------------------------------------------------------------------------------------------|-----------------------------|-----------------|
| Bare silicon-wafer                                                                          | 62 ± 1                      | -               |
| Peptide <b>3a</b> Boc-Phe-Phe- <i>am</i> -A <sup>NHCbz</sup> - <i>aeg</i> -OEt              | 73 ± 2                      | +11             |
| Peptide <b>3b</b> Boc-Phe-Phe- <i>am</i> -6-Cl-G <sup>NHiBu</sup> - <i>aeg</i> -OEt         | 84 ± 2                      | +22             |
| Peptide <b>3c</b> Boc-Phe-Phe- <i>am</i> -G <sup>NHiBu</sup> - <i>aeg</i> -OEt              | 95 ± 3                      | +33             |
| Peptide <b>3d</b> Boc-Phe-Phe- <i>am</i> -T- <i>aeg</i> -OEt                                | 74 ± 2                      | +12             |
| Peptide <b>6a</b> Boc-Phe-Phe- <i>tz</i> -A <sup>N(Boc)<sub>2</sub></sup> - <i>aeg</i> -OEt | 88 ± 2                      | +16             |
| Peptide <b>6b</b> Boc-Phe-Phe- <i>tz</i> -A <sup>NHCbz</sup> - <i>aeg</i> -OEt              | 77 ± 2                      | +15             |
| Peptide <b>6c</b> Boc-Phe-Phe- <i>tz</i> -G <sup>NHiBu</sup> - <i>aeg</i> -OEt              | 94 ± 3                      | +32             |
| Peptide <b>6d</b> Boc-Phe-Phe- <i>tz</i> -T- <i>aeg</i> -OEt                                | 75 ± 1                      | +13             |
| Peptide <b>7d</b> H-Phe-Phe- <i>tz</i> -T- <i>aeg</i> -OEt                                  | 70 ± 2                      | +8              |
| Peptide <b>8d</b> Boc-Phe-Phe- <i>tz</i> -T- <i>aeg</i> -OH                                 | 81 ± 1                      | +19             |
| Peptide <b>9</b> Boc-Phe-Phe- <i>tz</i> - <i>aeg</i> -OEt                                   | 71 ± 2                      | +9              |

<sup>a</sup>Data are the mean ± SD (n=4)

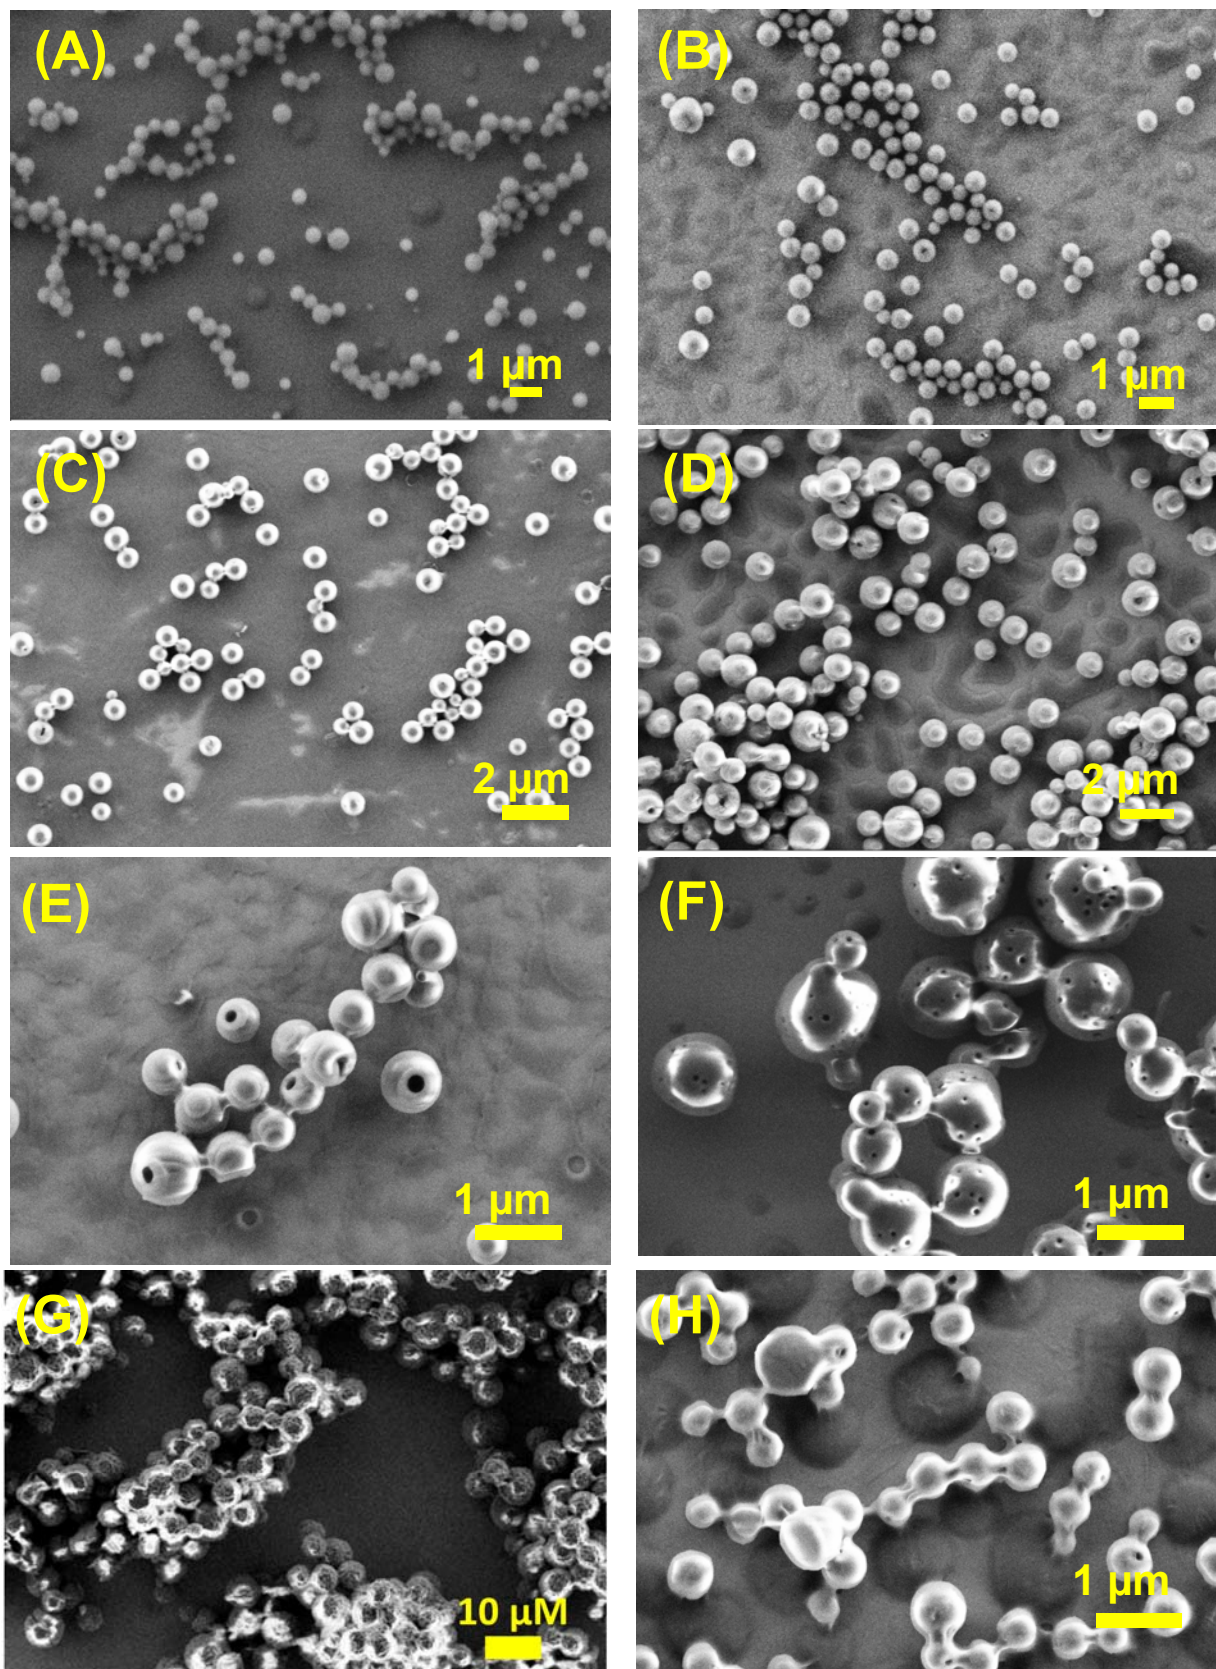

**Figure S54:** SEM images of peptide (A) **3a** (Boc-Phe-Phe-*am*-A<sup>NHCbz</sup>-*aeg*-OEt), (B) **3b** (Boc-Phe-Phe-*am*-6-Cl-G<sup>NHiBu</sup>-*aeg*-OEt), (C) **3c** (Boc-Phe-Phe-*am*-G<sup>NHiBu</sup>-*aeg*-OEt), (D) **3d** (Boc-Phe-Phe-*am*-T-*aeg*-OEt). (E) **6a** (Boc-Phe-Phe-*tz*-A<sup>N(Boc)<sub>2</sub></sup>-*aeg*-OEt), (F) **6b** (Boc-Phe-Phe-*tz*-A<sup>NHCbz</sup>-*aeg*-OEt), (G) **6c** (Boc-Phe-Phe-*tz*-G<sup>NHiBu</sup>-*aeg*-OEt) and (H) **6d** (Boc-Phe-Phe-*tz*-T-*aeg*-OEt).

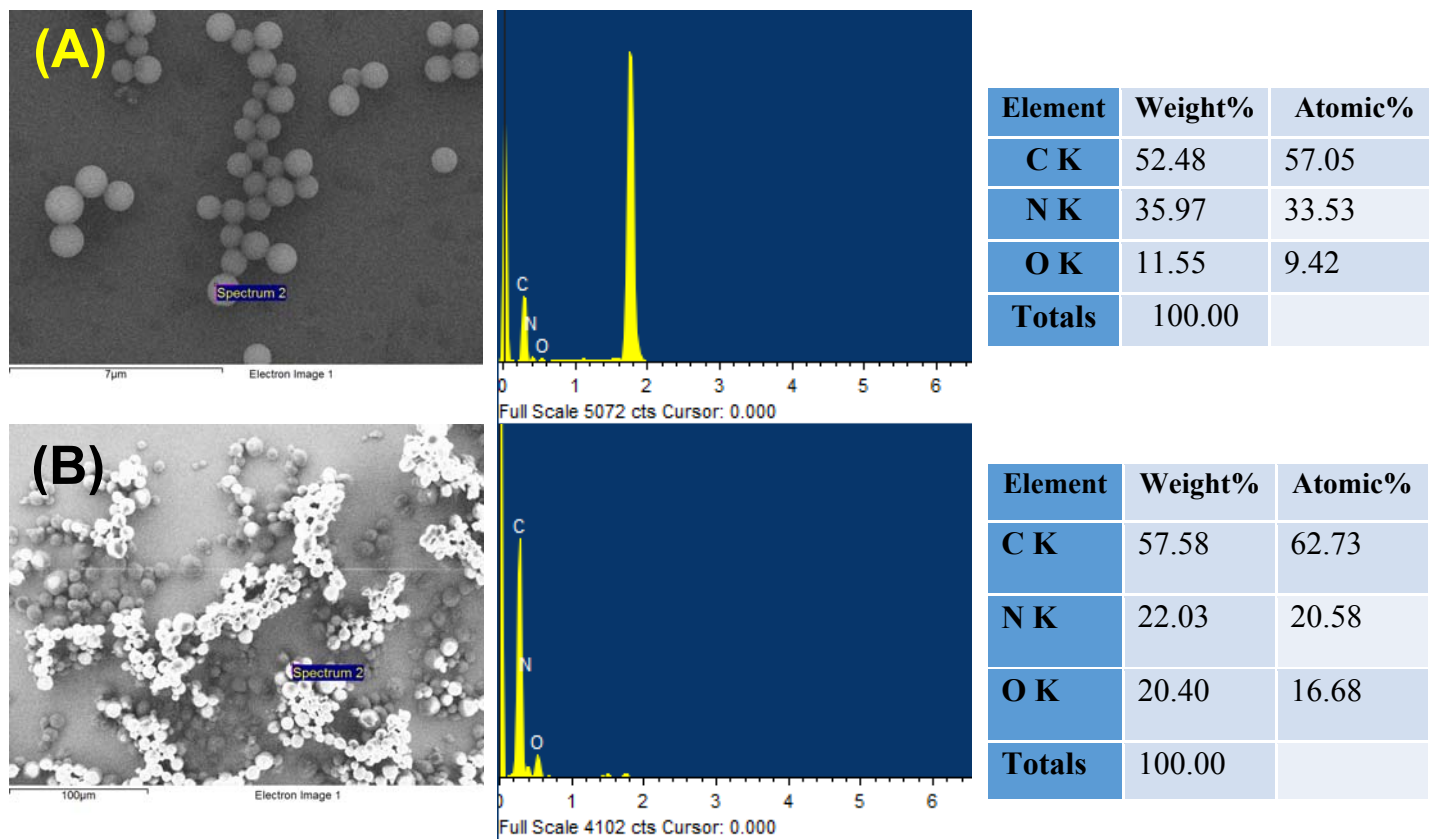

**Figure S55:** EDX images of (A) peptide **6b** (Boc-Phe-Phe-*tz*-A<sup>NHCbz</sup>-*aeg*-OEt), and (B) peptide **6c** (Boc-Phe-Phe-*tz*-G<sup>NHiBu</sup>-*aeg*-OEt).



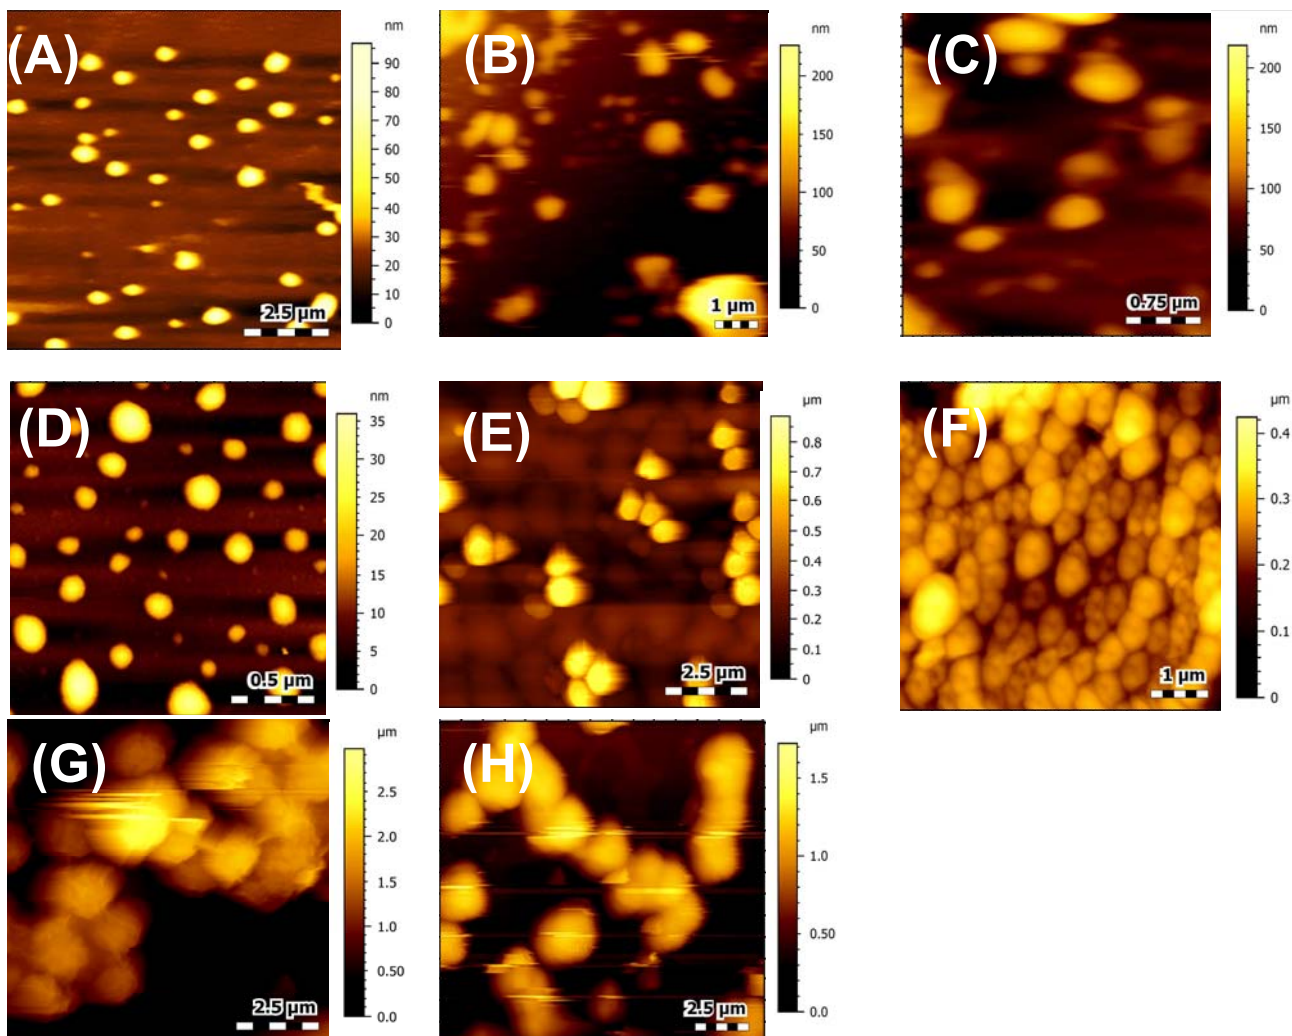

**Figure S56:** AFM topography images of (A) **3a** (Boc-Phe-Phe-*am*-A<sup>NHCbz</sup>-*aeg*-OEt), (B) **3b** (Boc-Phe-Phe-*am*-6-Cl-G<sup>NHiBu</sup>-*aeg*-OEt), (C) **3c** (Boc-Phe-Phe-*am*-G<sup>NHiBu</sup>-*aeg*-OEt), (D) **3d** (Boc-Phe-Phe-*am*-T-*aeg*-OEt). (E) **6a** (Boc-Phe-Phe-*tz*-A<sup>N(Boc)<sub>2</sub></sup>-*aeg*-OEt), (F) **6b** (Boc-Phe-Phe-*tz*-A<sup>NHCbz</sup>-*aeg*-OEt), (G) **6c** (Boc-Phe-Phe-*tz*-G<sup>NHiBu</sup>-*aeg*-OEt), (H) **6d** (Boc-Phe-Phe-*tz*-T-*aeg*-OEt).

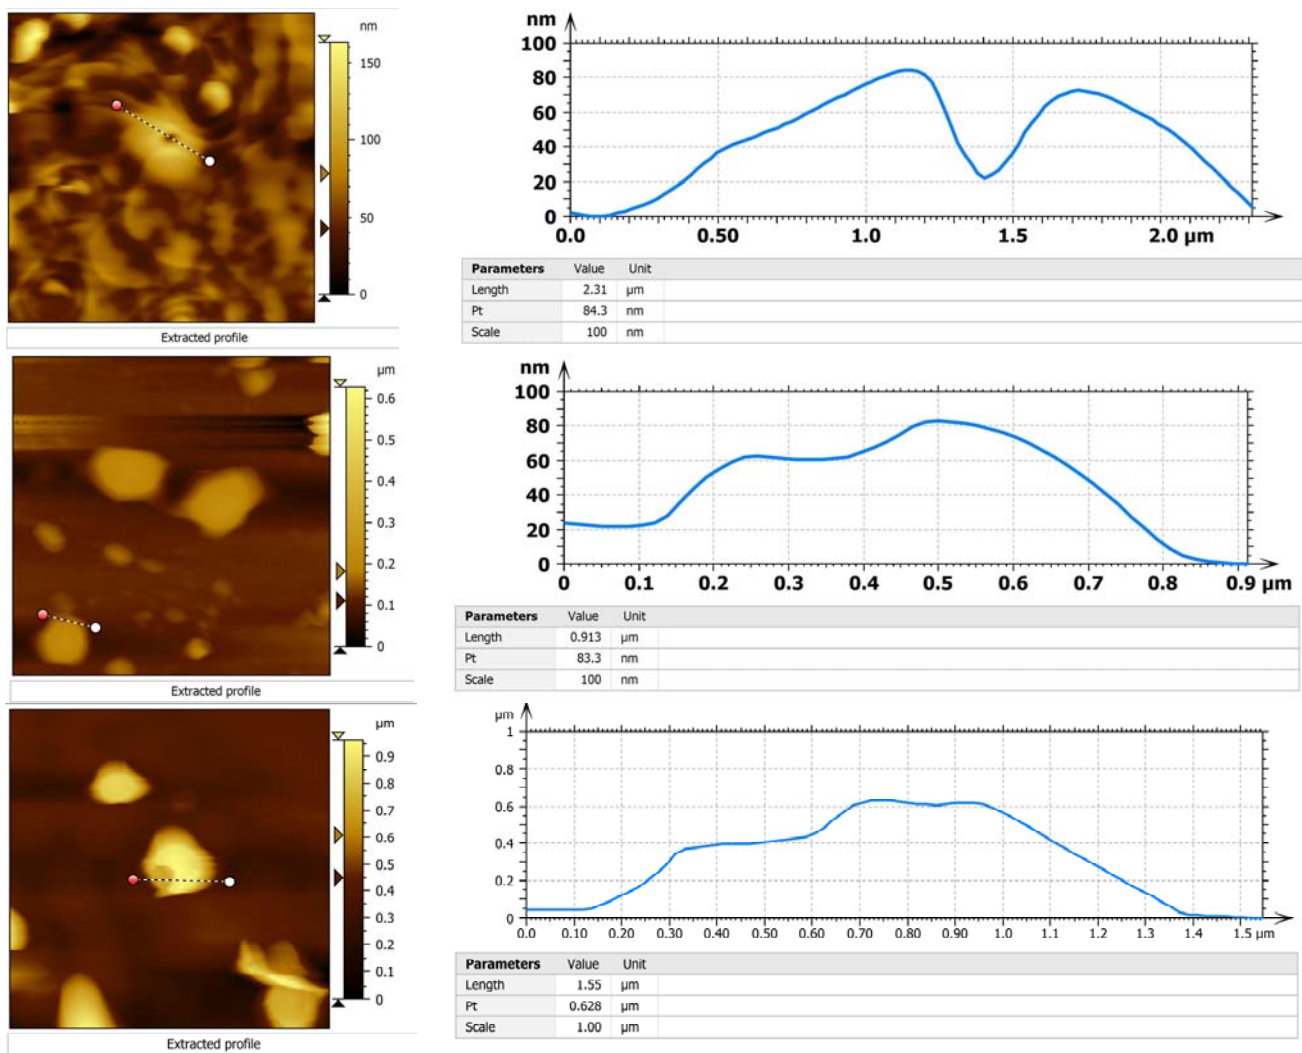

**Figure S57:** Height profiles diagrams of peptide **6a** (Boc-Phe-Phe-tz- $\text{A}^{\text{N}(\text{Boc})_2}$ -aeg-OEt) at different places of nanoparticles obtained from AFM.

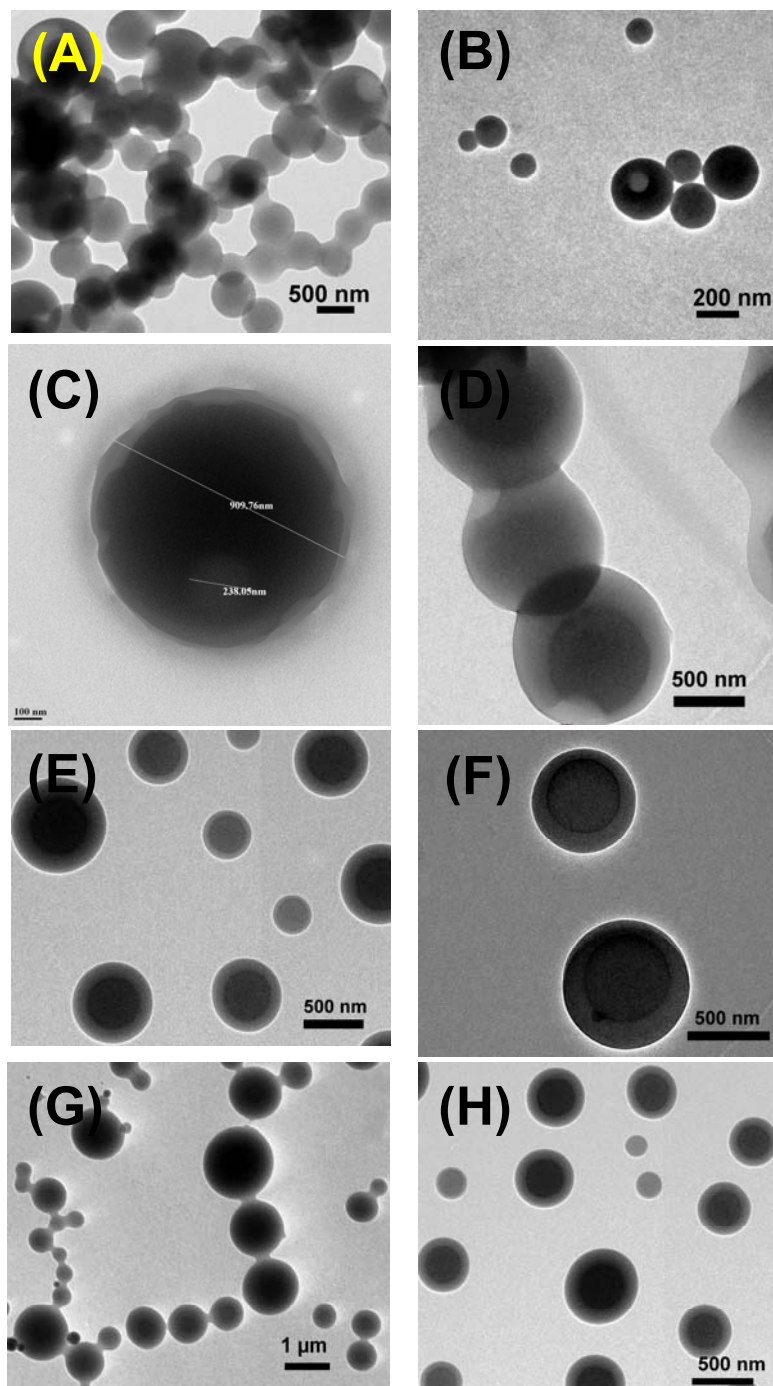

**Figure S58:** HRTEM images of (A) **6a** (Boc-Phe-Phe-*tz*-A<sup>N(Boc)<sub>2</sub></sup>-*aeg*-OEt), (B) **6b** (Boc-Phe-Phe-*tz*-A<sup>NHCbz</sup>-*aeg*-OEt), (C) **6c** (Boc-Phe-Phe-*tz*-G<sup>NHiBu</sup>-*aeg*-OEt), (D) **6d** (Boc-Phe-Phe-*tz*-T-*aeg*-OEt), (E) **3a** (Boc-Phe-Phe-*am*-A<sup>NHCbz</sup>-*aeg*-OEt), (F) **3b** (Boc-Phe-Phe-*am*-6-Cl-G<sup>NHiBu</sup>-*aeg*-OEt), (G) **3c** (Boc-Phe-Phe-*am*-G<sup>NHiBu</sup>-*aeg*-OEt) and (H) **3d** (Boc-Phe-Phe-*am*-T-*aeg*-OEt).

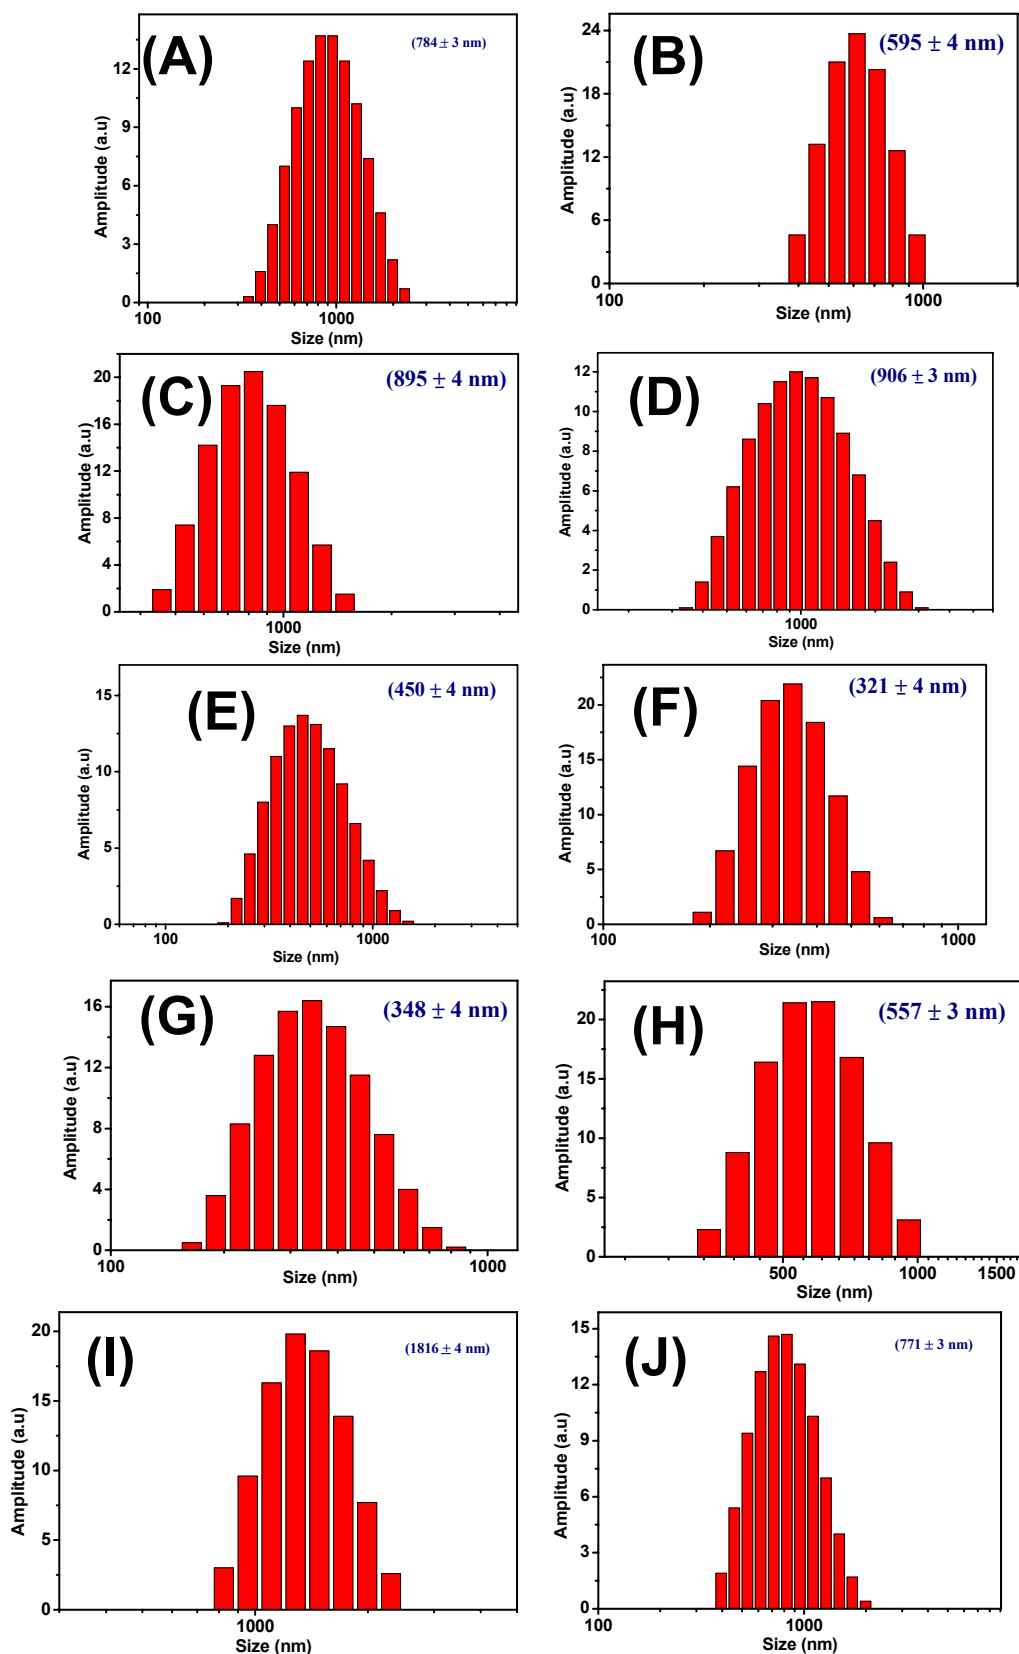

**Figure S59:** DLS spectra of fresh peptide solution of (A) **3a** (Boc-Phe-Phe-*am*-A<sup>NHCbz</sup>-*aeg*-OEt), (B) **3b** (Boc-Phe-Phe-*am*-6-Cl-G<sup>NHiBu</sup>-*aeg*-OEt), (C) **3c** (Boc-Phe-Phe-*am*-G<sup>NHiBu</sup>-*aeg*-OEt), (D) **3d** (Boc-Phe-Phe-*am*-T-*aeg*-OEt). (E) **6a** (Boc-Phe-Phe-*tz*-A<sup>N(Boc)<sub>2</sub></sup>-*aeg*-OEt) (PDI = 0.03), (F) **6b** (Boc-Phe-Phe-*tz*-A<sup>NHCbz</sup>-*aeg*-OEt) (PDI = 0.07), (G) **6c** (Boc-Phe-Phe-*tz*-G<sup>NHiBu</sup>-*aeg*-OEt), (H) **6d** (Boc-Phe-Phe-*tz*-T-*aeg*-OEt) and after 10 days incubation of (I) **6a** (PDI = 0.34), (J) **6b** (PDI = 0.57).



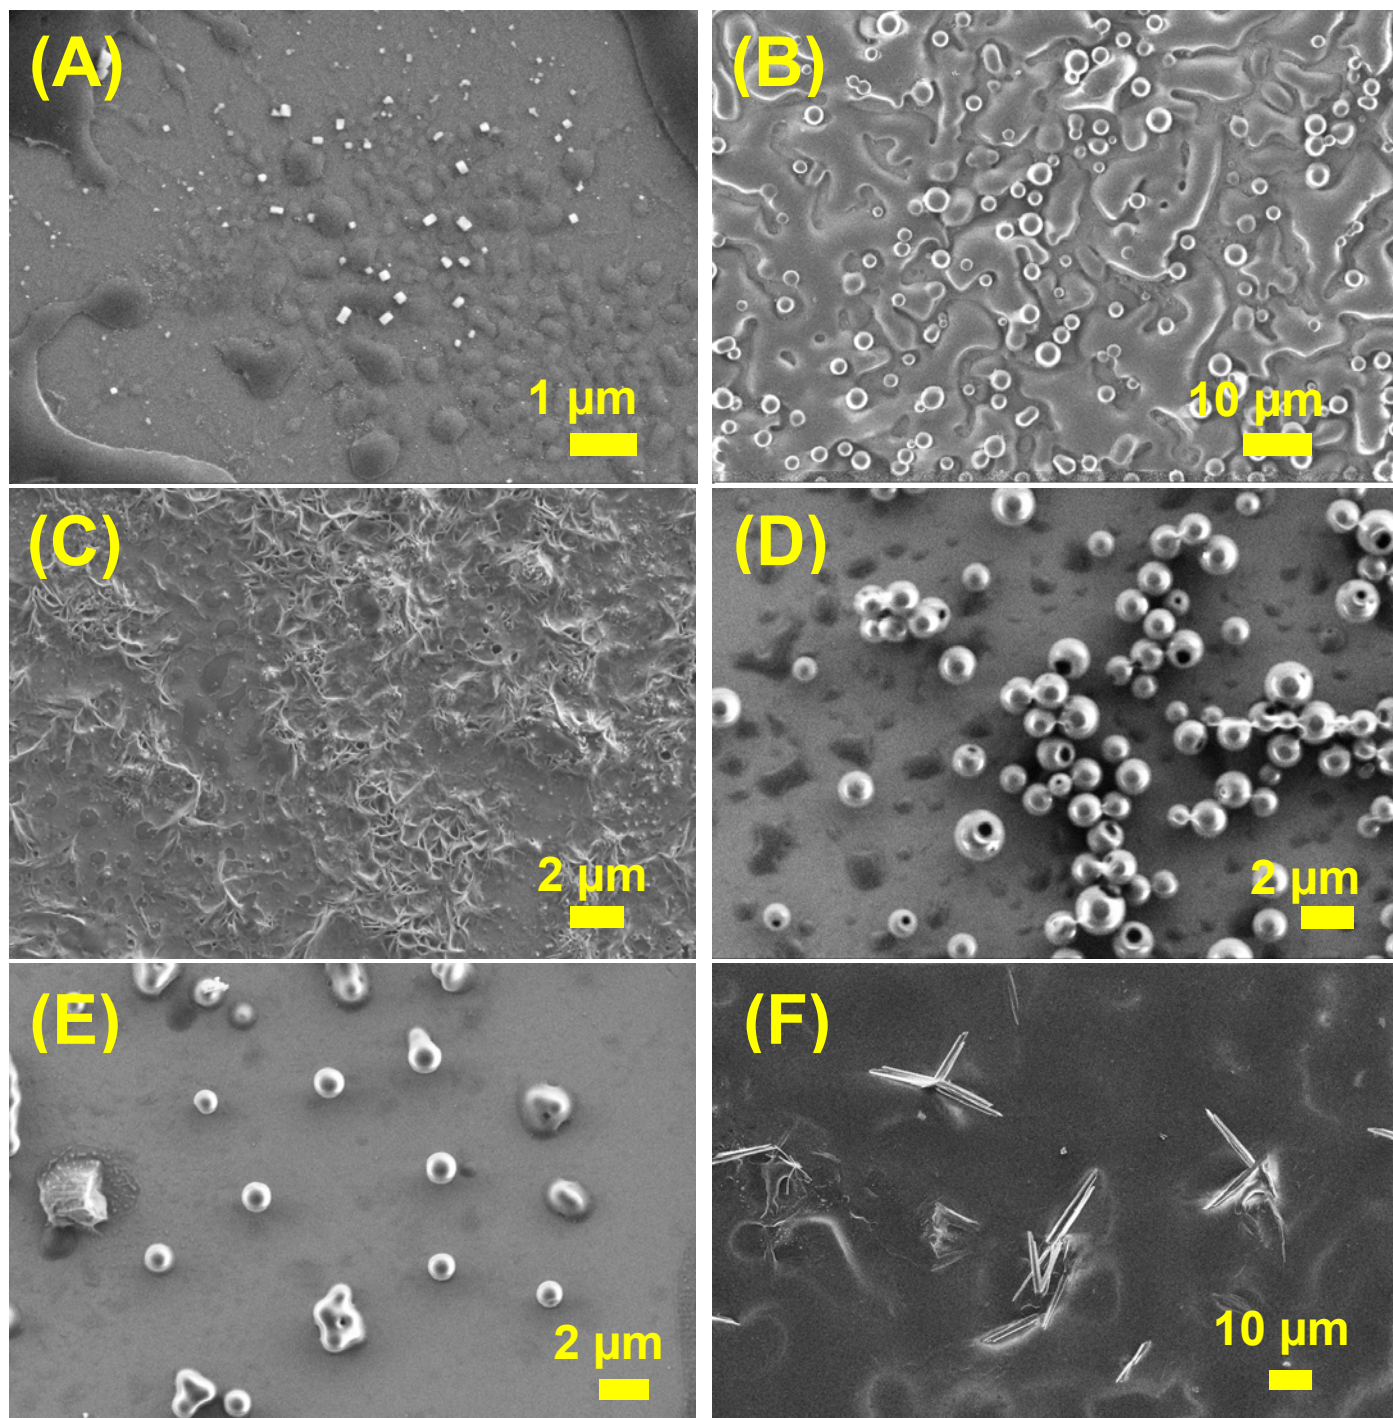

**Figure S60:** SEM images of peptide **6a** ( $\text{Boc-Phe-Phe-tz-A}^{\text{N(Boc)}_2\text{-aeg-OEt}}$ ) (A) at pH 2, (B) at pH 7, (C) at pH 10, (D) after heating at 100 °C for 4 h, (E) after incubation with proteinase K and (F) SEM image of proteinase K.



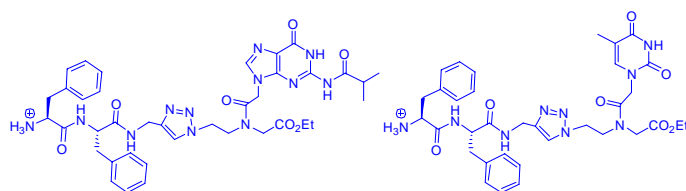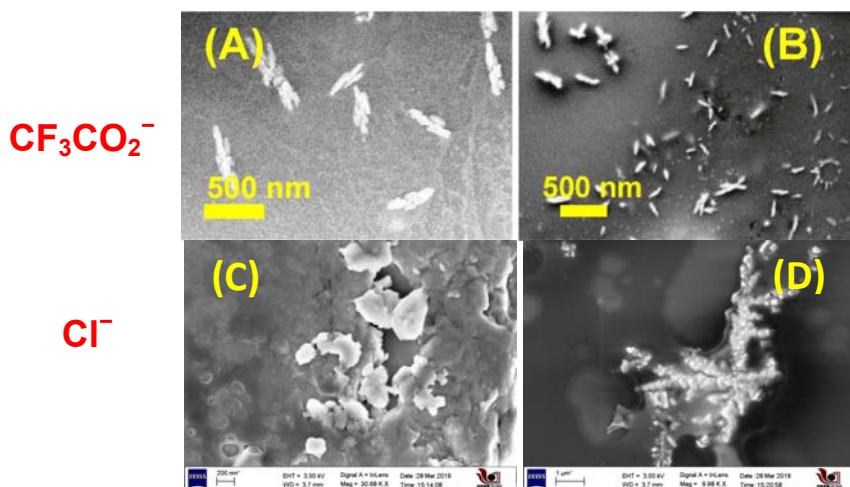

**Figure S61:** Effect of counter anion on self-assembled morphologies for nucleopeptide **7c** and **7d** in presence of trifluoroacetate (A, B) and chloride (C, D) respectively through SEM images.

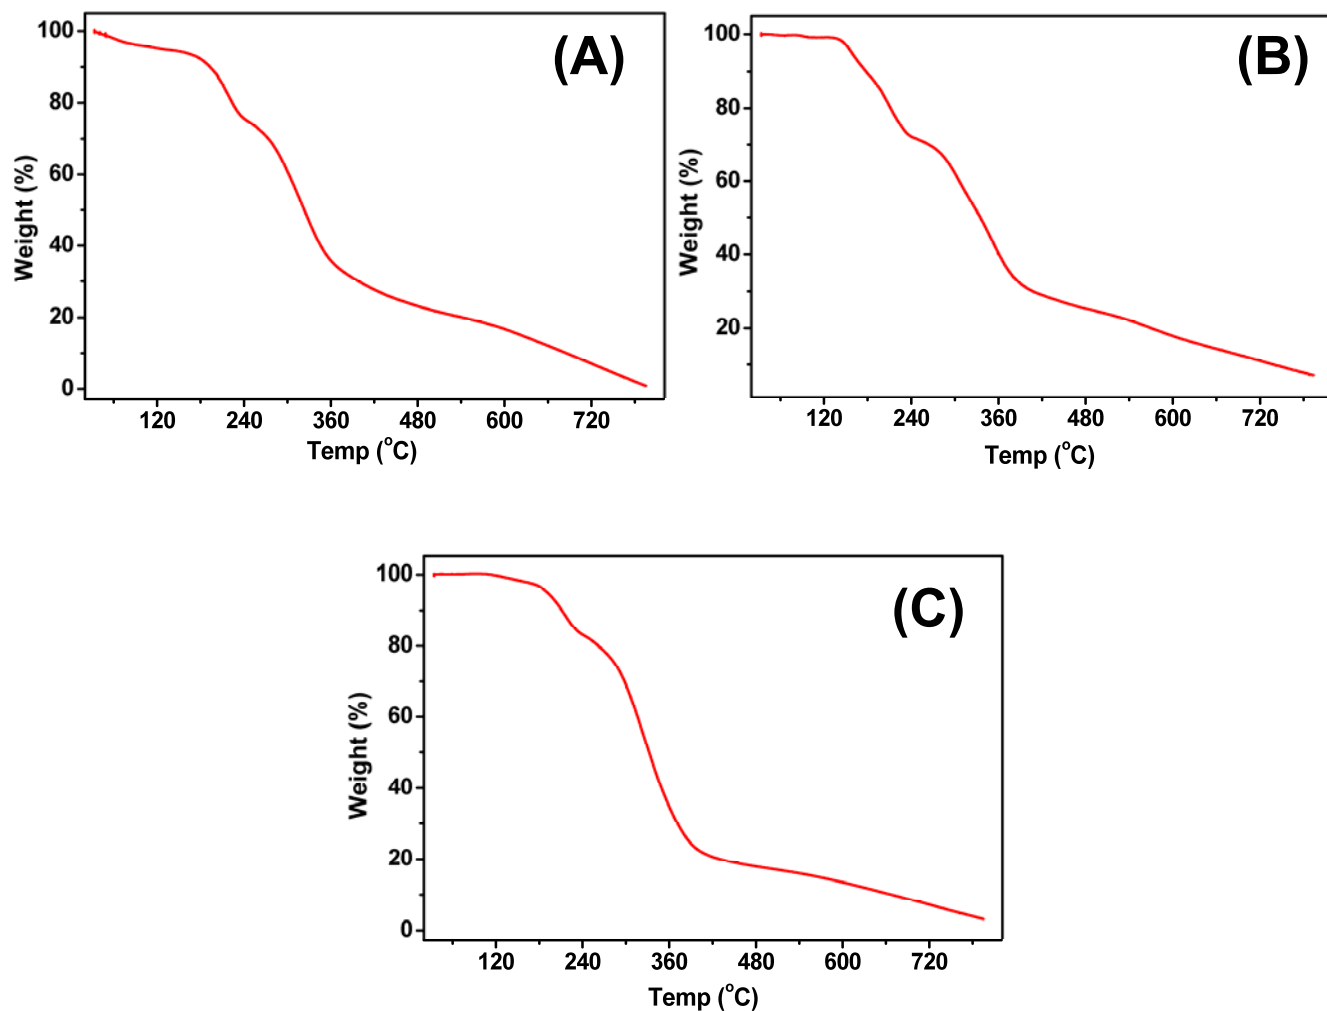

**Figure S62:** TGA of (A) peptide **3b** Boc-Phe-Phe-*am*-6-Cl-G<sup>NHiBu</sup>-*aeg*-OEt, (B) peptide **6b** Boc-Phe-Phe-*tz*-A<sup>NHCbz</sup>-*aeg*-OEt, and (C) peptide **6d** Boc-Phe-Phe-*tz*-T-*aeg*-OEt.

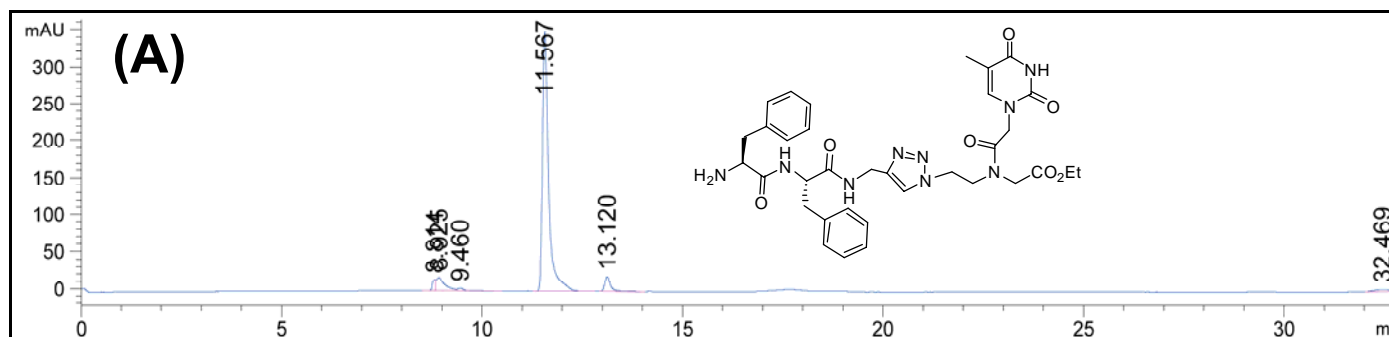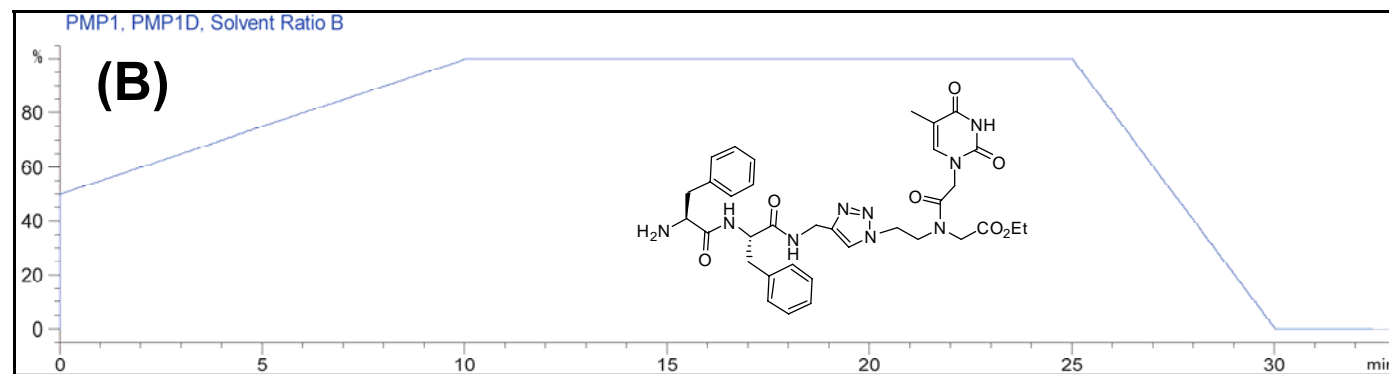

Solvent gradient with respect to solvent B

[Solvent A: 95% water, 4.5% acetonitrile, 0.5% TFA; Solvent B: 49.5% water, 50% acetonitrile, 0.5% TFA]

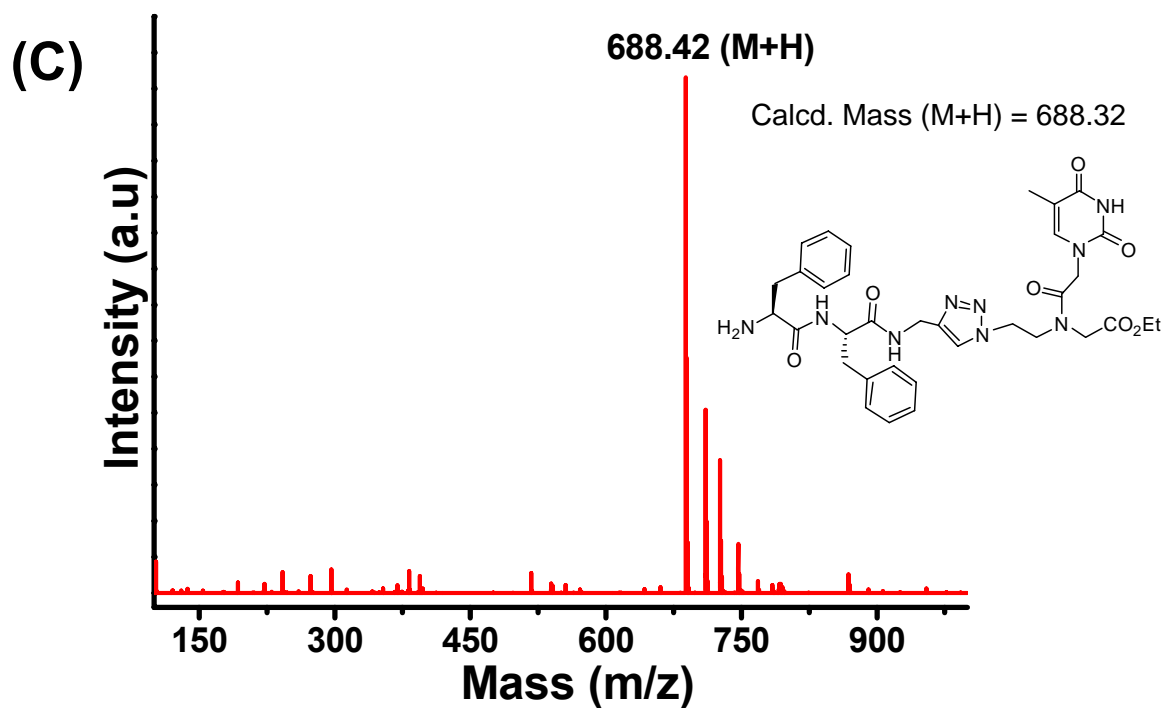

Figure S63: (A) HPLC Trace; (B) solvent gradient and (C) MALDI Mass for purified peptide 7d.



To examine the proteolytic stability, nucleopeptides **3c** (Boc-Phe-Phe-*am*-G<sup>NHiBu</sup>-*aeg*-OEt) and **6c** (Boc-Phe-Phe-*tz*-G<sup>NHiBu</sup>-*aeg*-OEt) were incubated with another proteolytic enzyme Chymotrypsin in HEPES buffer at physiological temperature (35 °C) and pH (7.5) following the literature procedure<sup>5</sup>. Then, mass spectra were taken at different time intervals to monitor if there is any change in the mass spectrum. No change of the mass spectrum was observed even after 24 h of incubation.

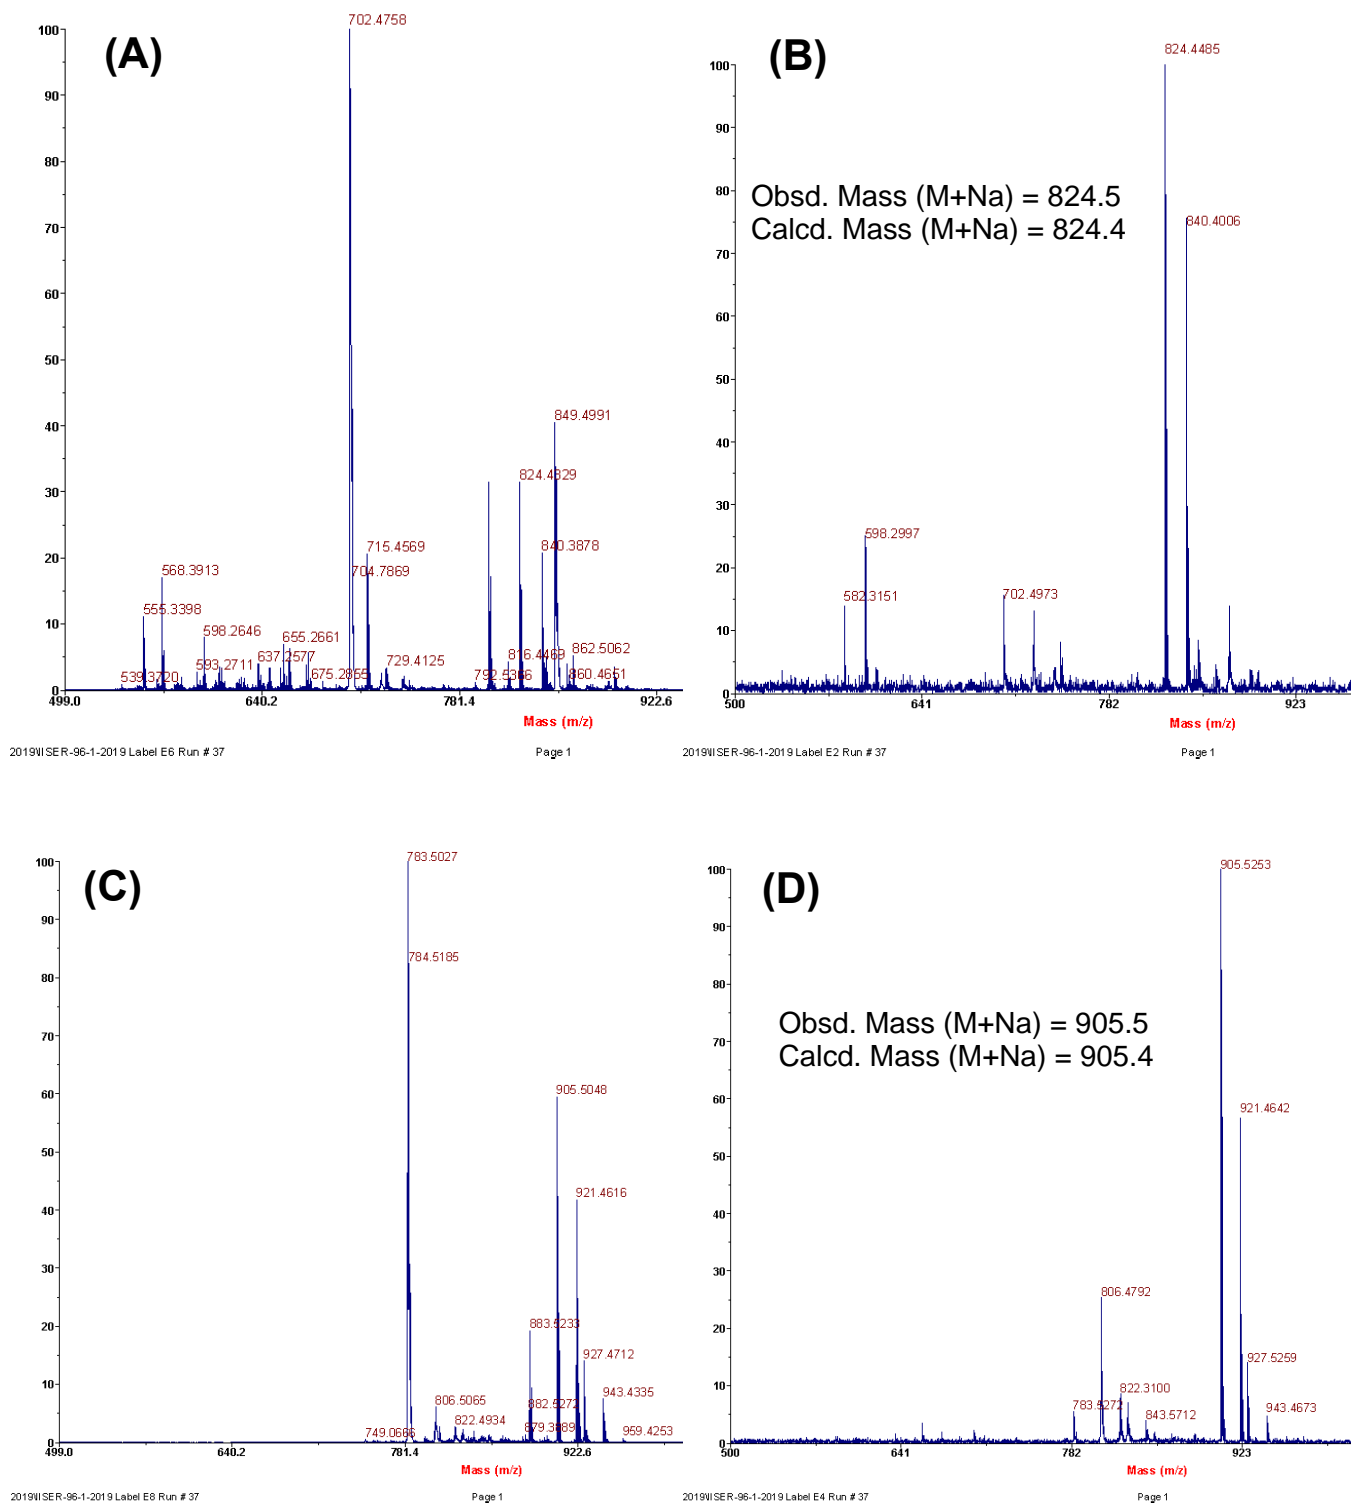

**Figure S65:** MALDI Mass for Chymotrypsin incubated peptide **3c** (A, B) and **6c** (C, D) after 12 h and 24 h respectively.

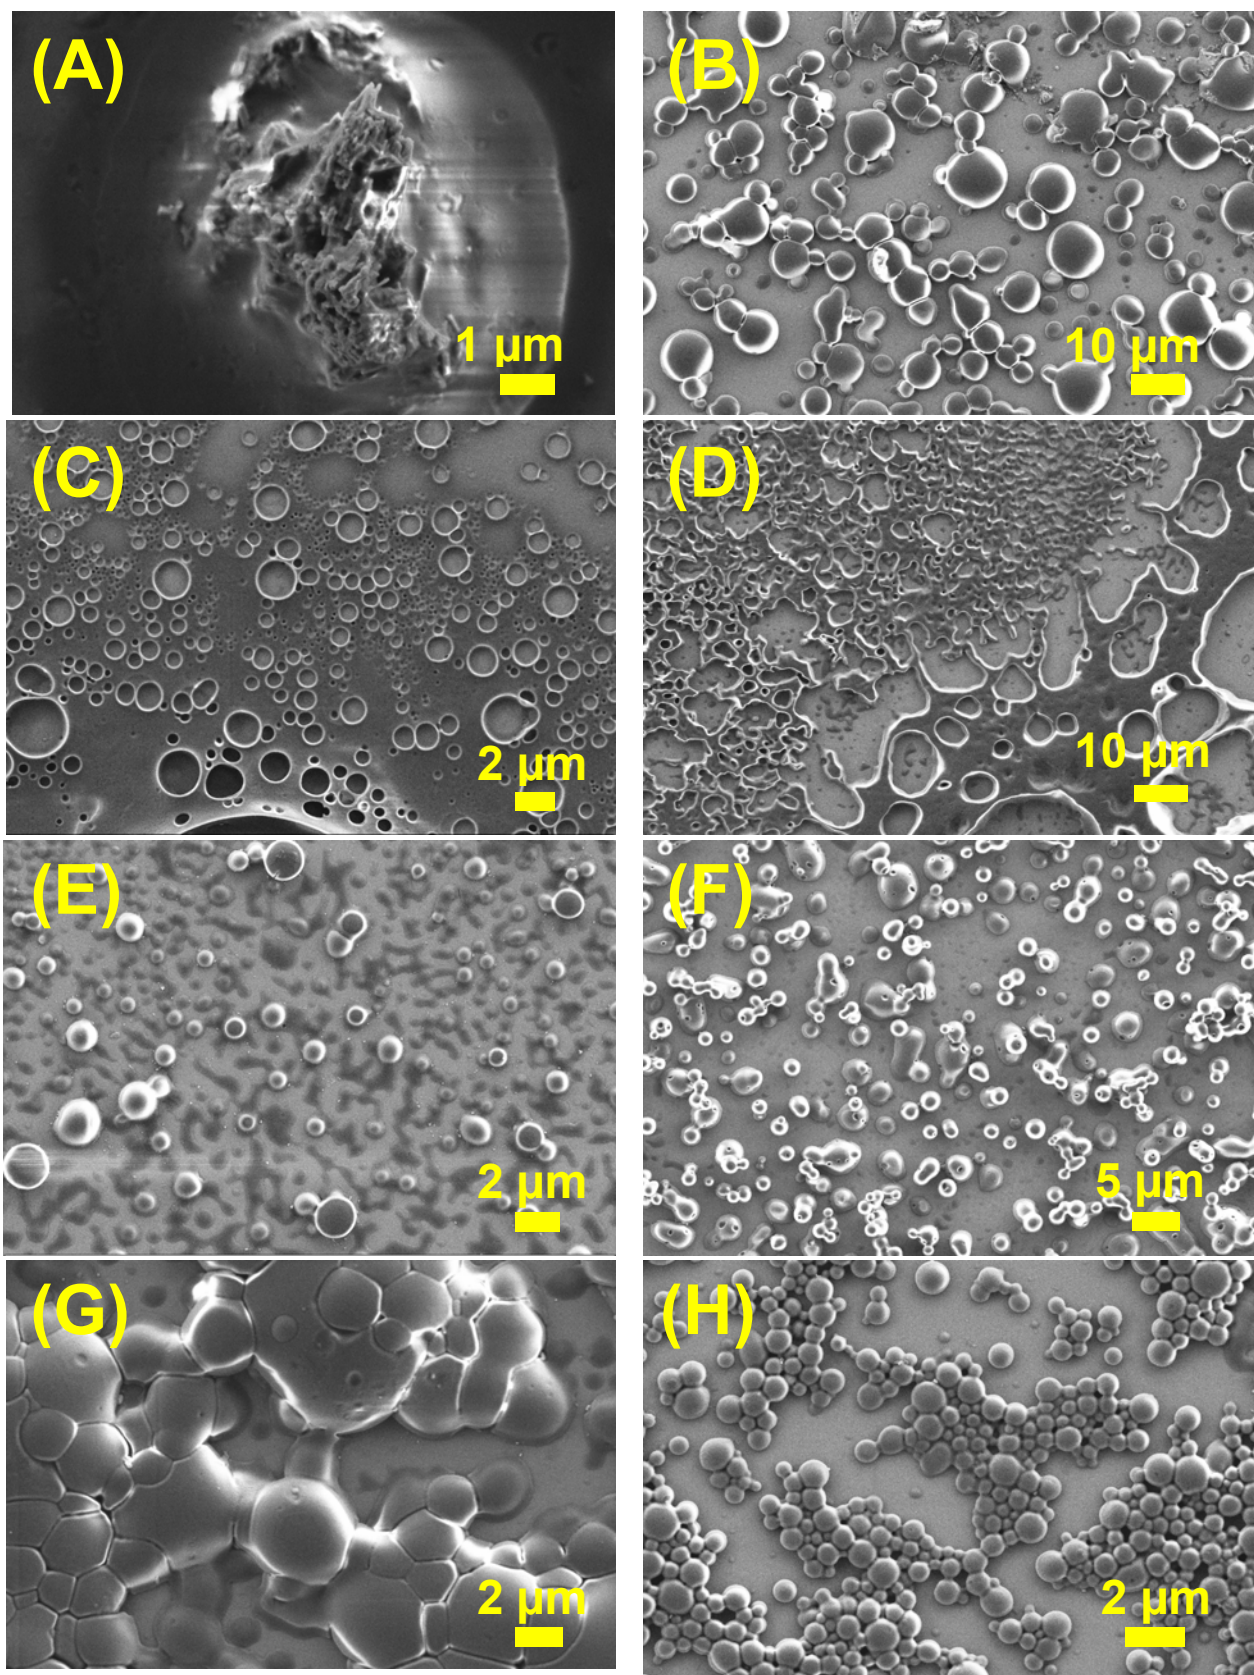

**Figure S66:** Solvent dependent morphology in SEM images of peptide **6a** (Boc-Phe-Phe-*tz*-A<sup>N(Boc)<sub>2</sub></sup>-*aeg*-OEt): (A) in THF, (B) in MeOH, (C) in CHCl<sub>3</sub>, (D) in DCM, (E) in 1:1 HFIP and water, (F) in 1:1 MeOH and water, (G) in 1:1 CHCl<sub>3</sub> and MeOH, and (H) in 1:1 THF and water.



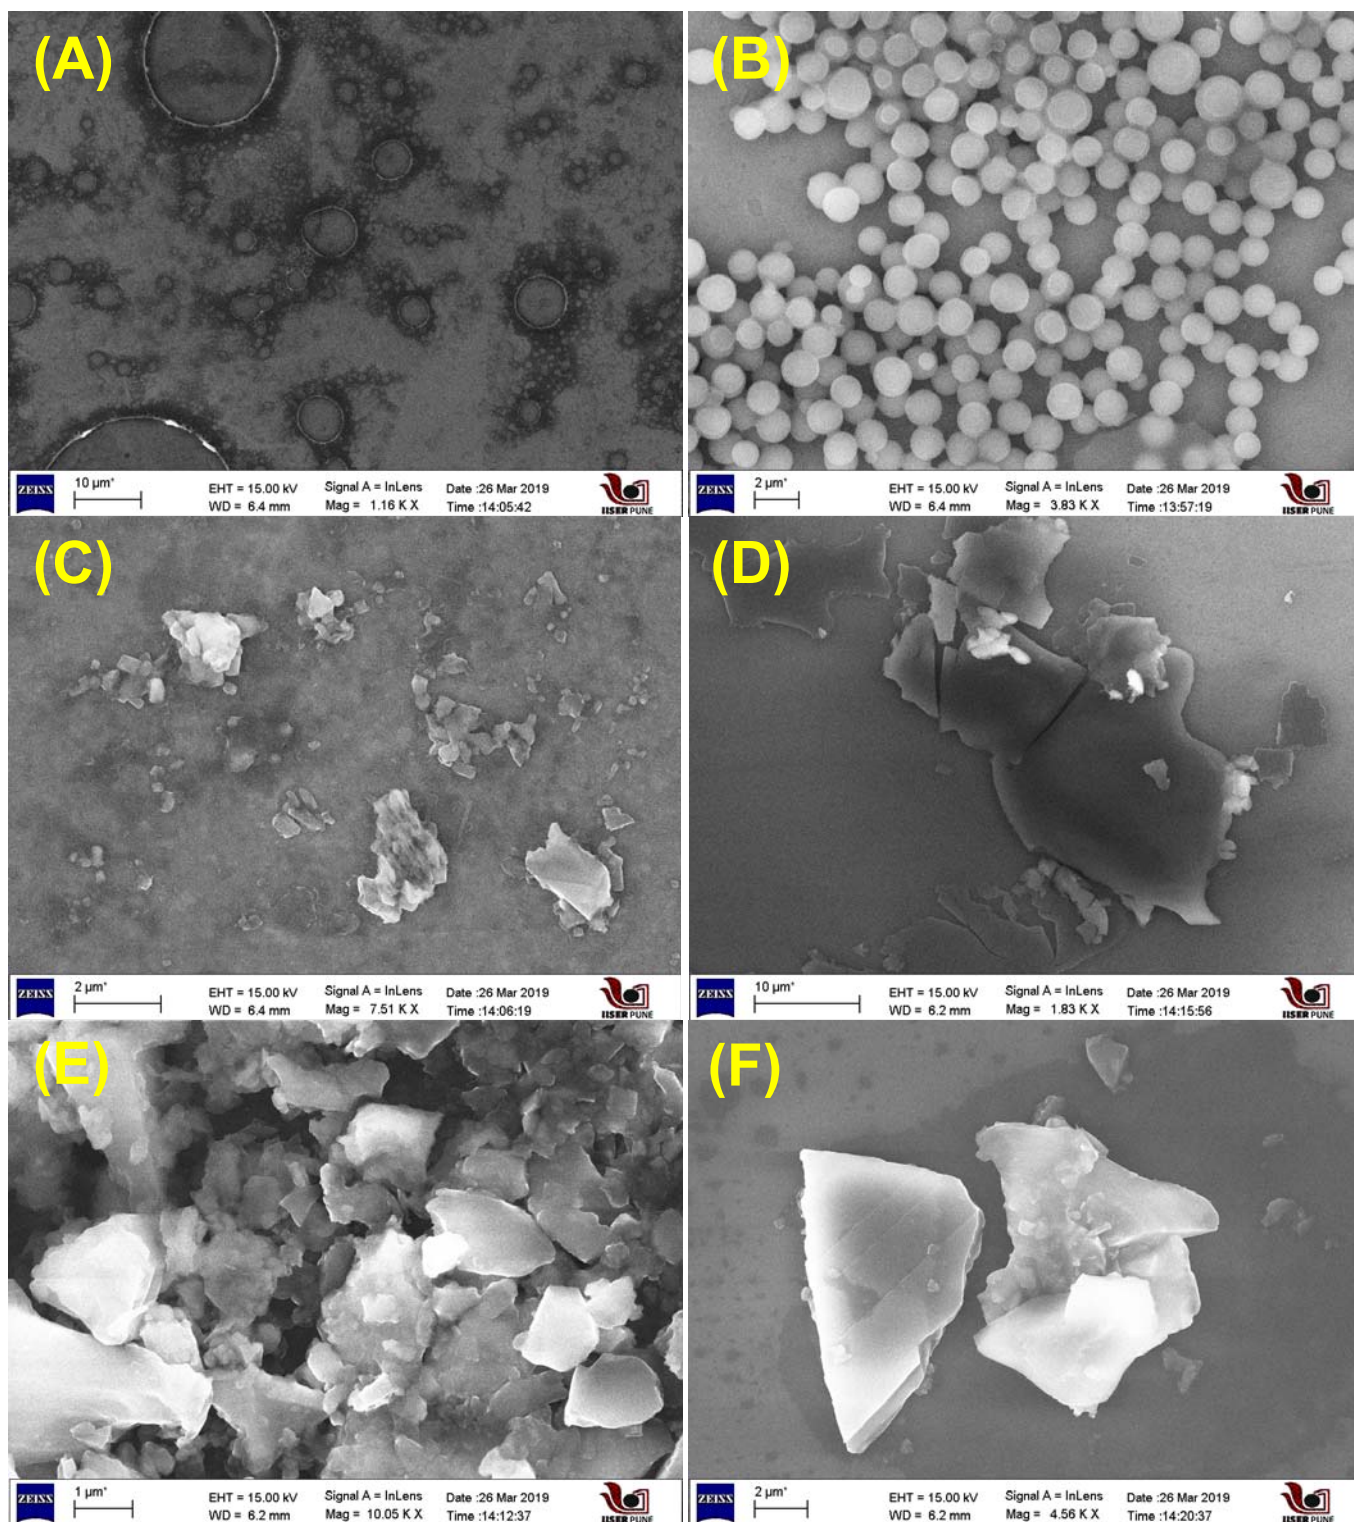

**Figure S67:** Solvent dependent morphology in SEM images of nucleopeptide **3c** (Boc-Phe-Phe-*am*-G<sup>NHibu</sup>-*aeg*-OEt) in (A) THF, (B) MeOH, (C) CHCl<sub>3</sub>, and **7d** (Boc-Phe-Phe-*am*-G<sup>NHibu</sup>-*aeg*-OEt) in (D) THF, (E) MeOH and (F) CHCl<sub>3</sub>.

- ❖ SEM images clearly shows that only in presence of MeOH (which was not anhydrous) ordered spherical morphology was exhibited by nucleopeptide **3c**. Other neat solvents failed to produce good self-assembled morphologies



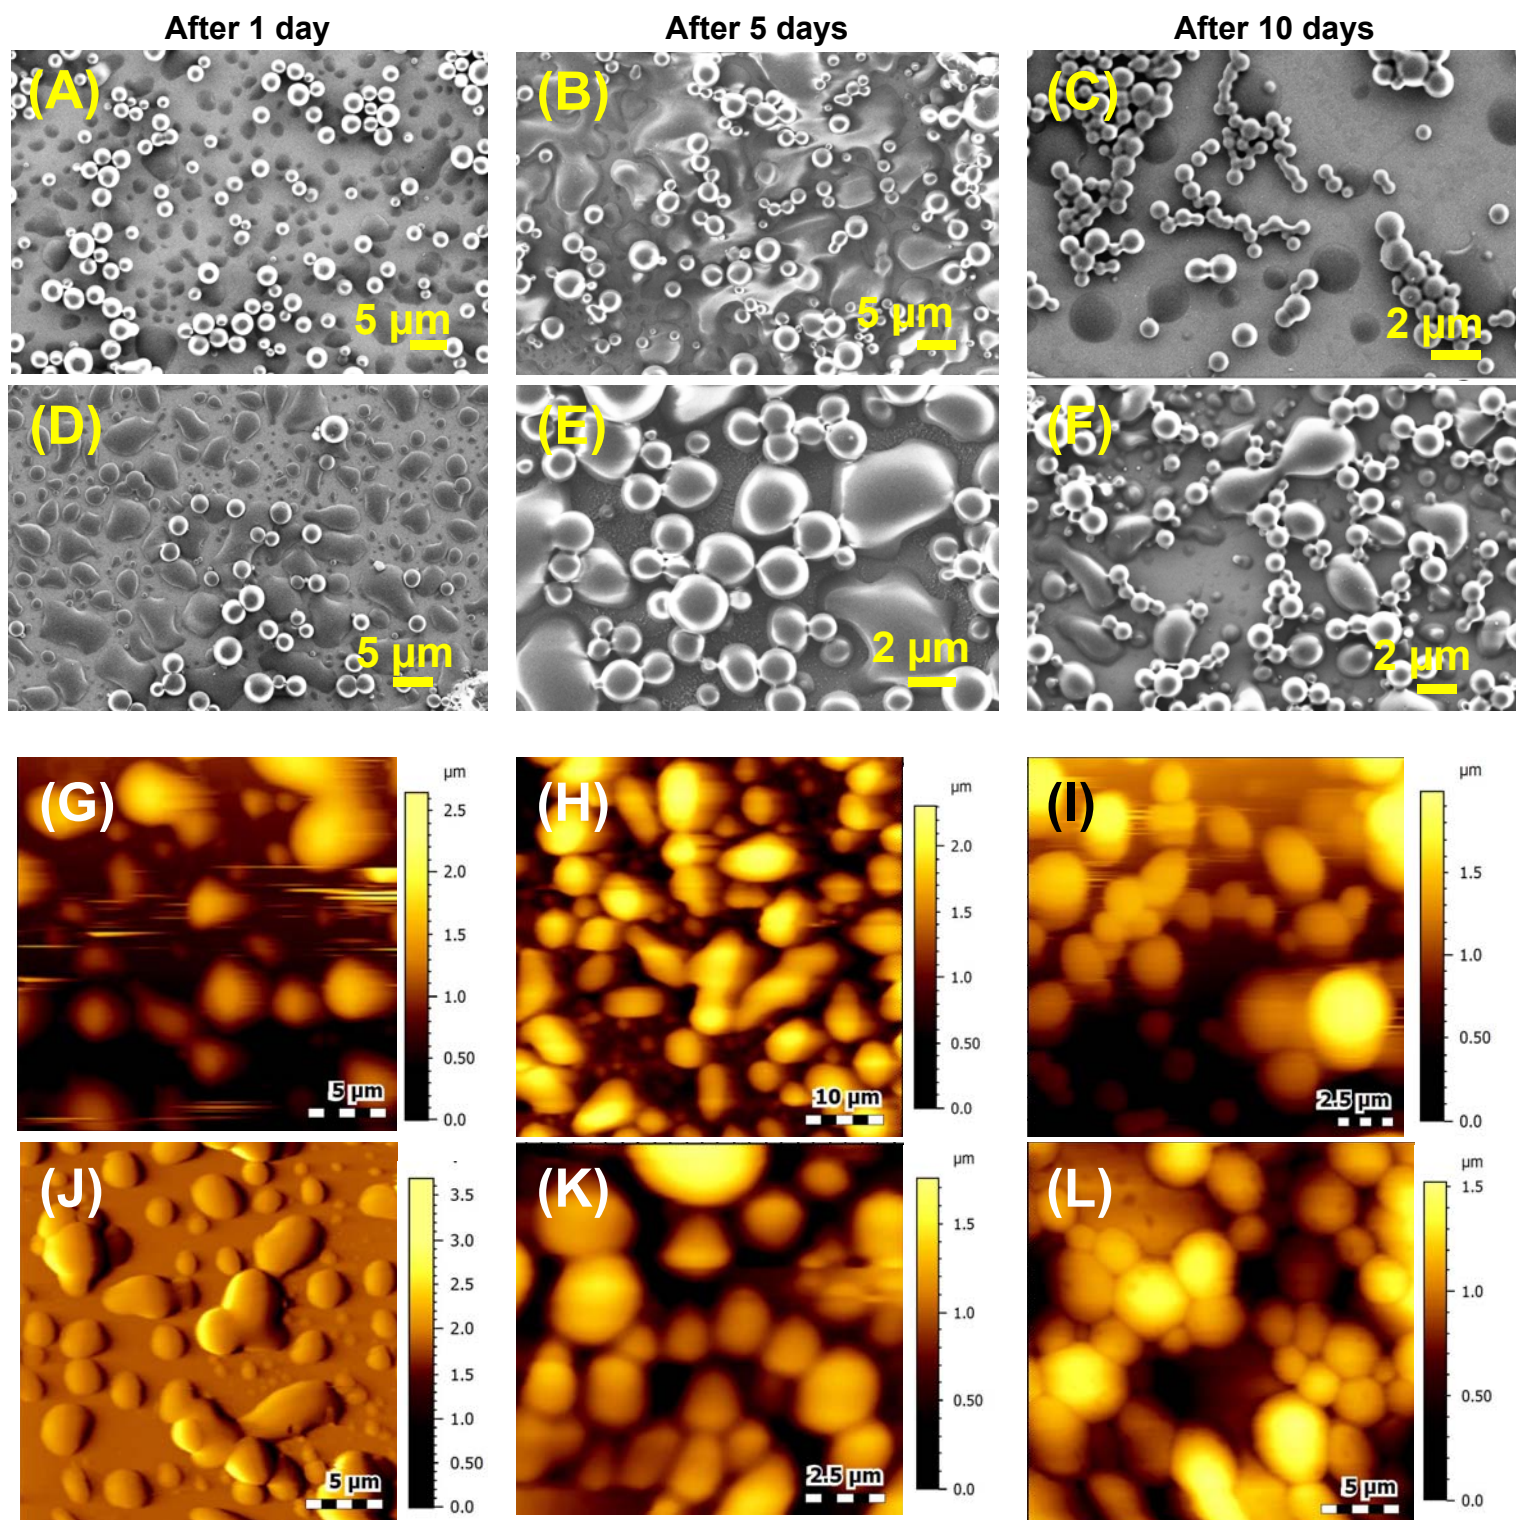

**Figure S68:** Time dependent morphologies observed through SEM for nucleopeptide **6a** (Boc-Phe-Phe-*tz*-A<sup>N(Boc)<sub>2</sub></sup>-*aeg*-OEt) (FigA-C), **6b** (Boc-Phe-Phe-*tz*-A<sup>NHCbz</sup>-*aeg*-OEt) (FigD-F) and AFM for nucleopeptide **6a** (Boc-Phe-Phe-*tz*-A<sup>N(Boc)<sub>2</sub></sup>-*aeg*-OEt) (FigG-I), **6b** (Boc-Phe-Phe-*tz*-A<sup>NHCbz</sup>-*aeg*-OEt) (FigJ-L) respectively.



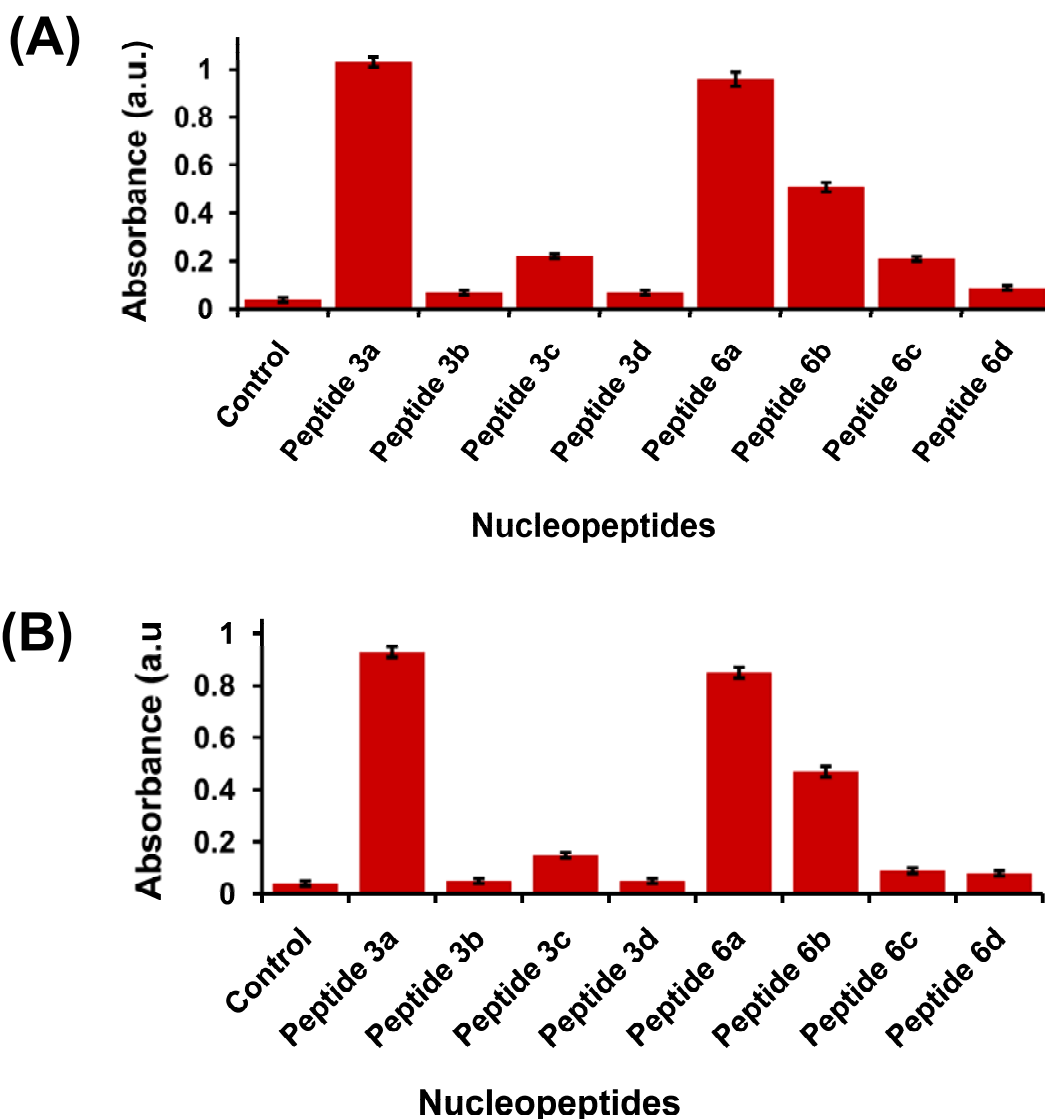

**Figure S69:** Absorbance values measured from turbidity assay of nucleopeptides at (A) 405 nm and (B) 570 nm.

**Table S2:** Absorbance of nucleopeptides observed in turbidity assay at 405 and 570 nm

| Nucleopeptides                                                                              | Abs. in turbidity assay at 405 nm <sup>a</sup> | Abs. in turbidity assay at 570 nm <sup>a</sup> |
|---------------------------------------------------------------------------------------------|------------------------------------------------|------------------------------------------------|
| Peptide <b>3a</b> Boc-Phe-Phe- <i>am</i> -A <sup>NHCbz</sup> - <i>aeg</i> -OEt              | 1.03 ± 0.02                                    | 0.93 ± 0.02                                    |
| Peptide <b>3b</b> Boc-Phe-Phe- <i>am</i> -6-Cl-G <sup>NHiBu</sup> - <i>aeg</i> -OEt         | 0.07 ± 0.01                                    | 0.05 ± 0.01                                    |
| Peptide <b>3c</b> Boc-Phe-Phe- <i>am</i> -G <sup>NHiBu</sup> - <i>aeg</i> -OEt              | 0.22 ± 0.01                                    | 0.15 ± 0.01                                    |
| Peptide <b>3d</b> Boc-Phe-Phe- <i>am</i> -T- <i>aeg</i> -OEt                                | 0.07 ± 0.01                                    | 0.05 ± 0.01                                    |
| Peptide <b>6a</b> Boc-Phe-Phe- <i>tz</i> -A <sup>N(Boc)<sub>2</sub></sup> - <i>aeg</i> -OEt | 0.96 ± 0.03                                    | 0.85 ± 0.02                                    |
| Peptide <b>6b</b> Boc-Phe-Phe- <i>tz</i> -A <sup>NHCbz</sup> - <i>aeg</i> -OEt              | 0.51 ± 0.02                                    | 0.47 ± 0.02                                    |
| Peptide <b>6c</b> Boc-Phe-Phe- <i>tz</i> -G <sup>NHiBu</sup> - <i>aeg</i> -OEt              | 0.21 ± 0.01                                    | 0.09 ± 0.01                                    |
| Peptide <b>6d</b> Boc-Phe-Phe- <i>tz</i> -T- <i>aeg</i> -OEt                                | 0.09 ± 0.01                                    | 0.08 ± 0.01                                    |
| Control                                                                                     | 0.04 ± 0.01                                    | 0.04 ± 0.01                                    |

<sup>a</sup>Data are the mean ± SD (n=4)

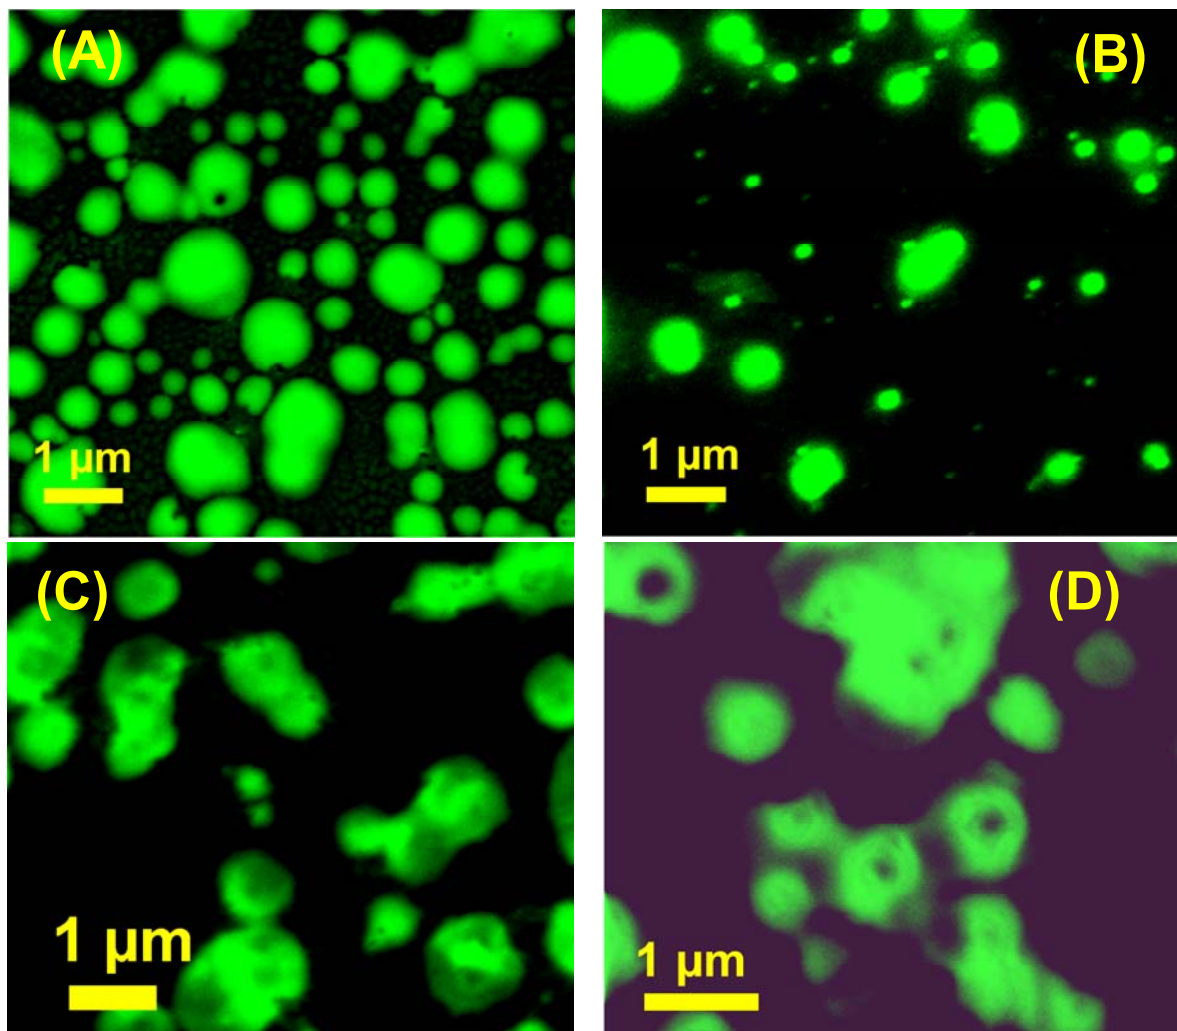

**Figure S70:** Confocal microscope images of fluorescent dye encapsulated nucleopeptide (A) **6a** (Boc-Phe-Phe-tz-A<sup>N(Boc)</sup>-aeg-OEt), (B) **6b** (Boc-Phe-Phe-tz-A<sup>NHCBz</sup>-aeg-OEt), (C) **6c** (Boc-Phe-Phe-tz-G<sup>NHiBu</sup>-aeg-OEt) and (D) **6d** (Boc-Phe-Phe-tz-T-aeg-OEt).

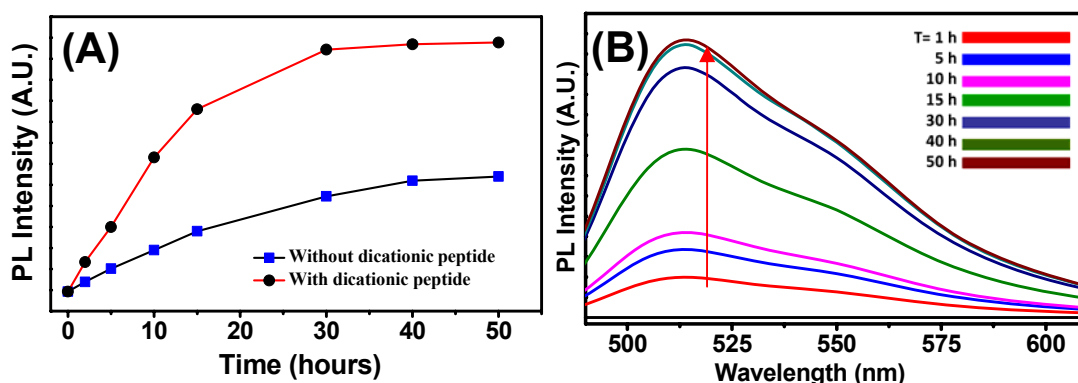

**Figure S71:** The increasing fluorescence intensity of the solution outside the dialysis tube containing CF encapsulated peptide **6a** (Boc-Phe-Phe-tz-A<sup>N(Boc)</sup>-aeg-OEt), after the addition of 3 eq. of (A) dicationic peptide (Boc-Lys-Lys-OMe) into dialysis tube. (B) Fluorescence emission spectra of carboxyfluorescein showing increasing intensity after the addition of dicationic peptide into CF encapsulated peptide **6a** (Boc-Phe-Phe-tz-A<sup>N(Boc)</sup>-aeg-OEt) (at 517 nm,  $\lambda_{ex} = 417$ nm).

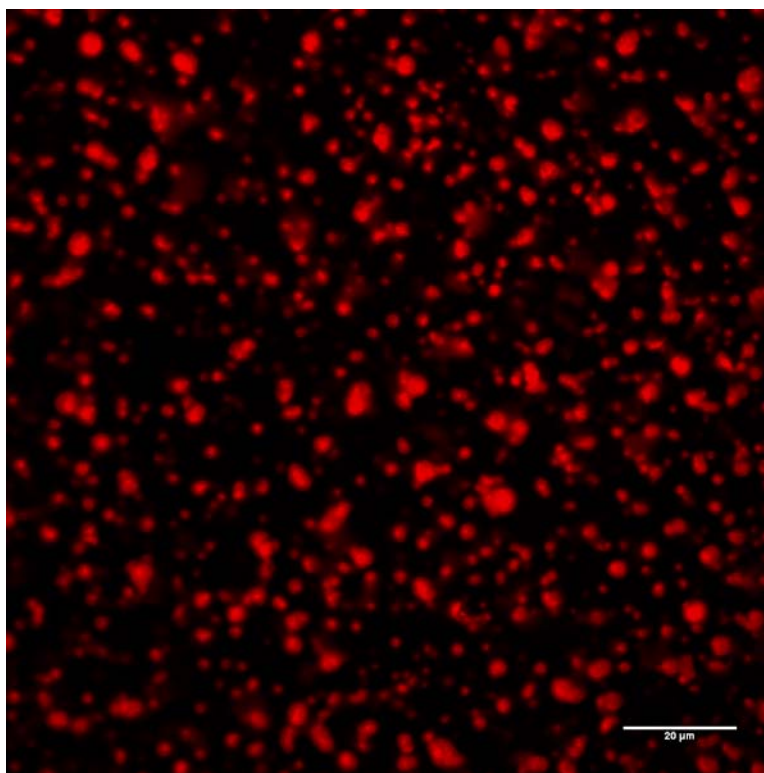

**Figure S72:** Confocal microscope images of fluorescent drug doxorubicin encapsulated nucleopeptide **6a** (Boc-Phe-Phe-*tz*-A<sup>N(Boc)<sub>2</sub></sup>-*aeg*-OEt) (emission at 590 nm,  $\lambda_{\text{ex}} = 485$  nm).

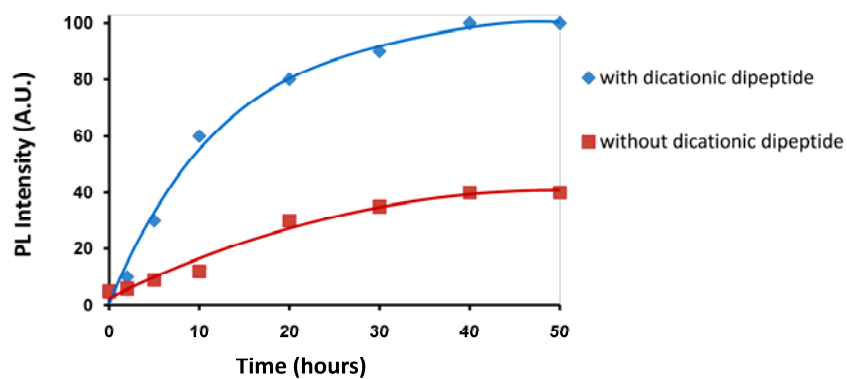

**Figure S73:** The increasing fluorescence intensity of the solution outside the dialysis tube containing Doxorubicin encapsulated peptide **6a** (Boc-Phe-Phe-*tz*-A<sup>N(Boc)<sub>2</sub></sup>-*aeg*-OEt), after the addition of 3 eq. of dicationic peptide (Boc-Lys-Lys-OMe) into dialysis tube (emission at 595 nm,  $\lambda_{\text{ex}} = 480$  nm).

## Cyclic voltammetry:

Electrochemical Analysis was done in the Biologic VMP3 multichannel potentiostat. A standard three-electrode cell consisting of a Toray carbon Paper having 1 cm<sup>2</sup> as the working electrode, Ag/AgCl (sat. KCl) as the reference electrode and a Pt foil as the counter electrode were used for electrochemical measurements. The solution were purged with Ar during the experiments. The potential values are in volt (V) vs. Ag/AgCl scale. The electrolyte was a standard inorganic solution of 0.1M Potassium Phosphate Buffer electrolytes at pH=7.4 and 0.1M KCl. All working electrodes had an identical geometric area of 1.00 cm<sup>2</sup>. The capacitance was evaluated from experimental cyclic voltammetric profile, according to the following equation:

$$C = \frac{A_T / 2}{\Delta V \times V_{SR} \times A_e}$$

$C$  = Total capacitance in millifarad per cm<sup>2</sup>(or in mF / cm<sup>2</sup>)

$A_T$  = Total area under the curve of cyclic voltammetry in milliampere (or in mA)

$V_{SR}$  = Scan rate (50 mV/s)

$A_e$  = Area of the toray carbon paper electrode (1 cm<sup>2</sup>)

$\Delta V$  = Potential window (-0.300 V to 0.900 V *i.e.* [0.900 + 0.300] V = 1.2 V)

All solutions were prepared using triply distilled water and the cell temperature was maintained at 27 °C. Currents are normalized with respect to geometric area (1 cm<sup>2</sup>). All the electrolytic solutions were prepared by 0.1M Potassium Phosphate Buffer electrolytes at pH=7.4 and 0.1M KCl. Working electrodes were made by drop casting a suspension of those peptides (2 mg/400 μL in a 10 wt% aqueous dispersion of PTFE) on a Toray carbon paper electrode.

**Table S3:** Capacitance values of peptide modified Torey carbon electrodes

| Peptides used for electrode modification                  | Capacitance (μF/cm <sup>2</sup> ) |
|-----------------------------------------------------------|-----------------------------------|
| Boc-Phe-Phe-tz-A <sup>N(Boc)</sup> -aeg-OEt ( <b>6a</b> ) | 260.0                             |
| Boc-Phe-Phe-tz-A <sup>NHCbz</sup> -aeg-OEt ( <b>6b</b> )  | 205.8                             |
| Boc-Phe-Phe-tz-G <sup>NHiBu</sup> -aeg-OEt ( <b>6c</b> )  | 617.0                             |
| Boc-Phe-Phe-tz-T-aeg-OEt ( <b>6d</b> )                    | 342.0                             |
| Boc-Phe-Phe-tz-aeg-OEt ( <b>9</b> )                       | 500.0                             |
| None (unmodified electrode)                               | 90.0                              |

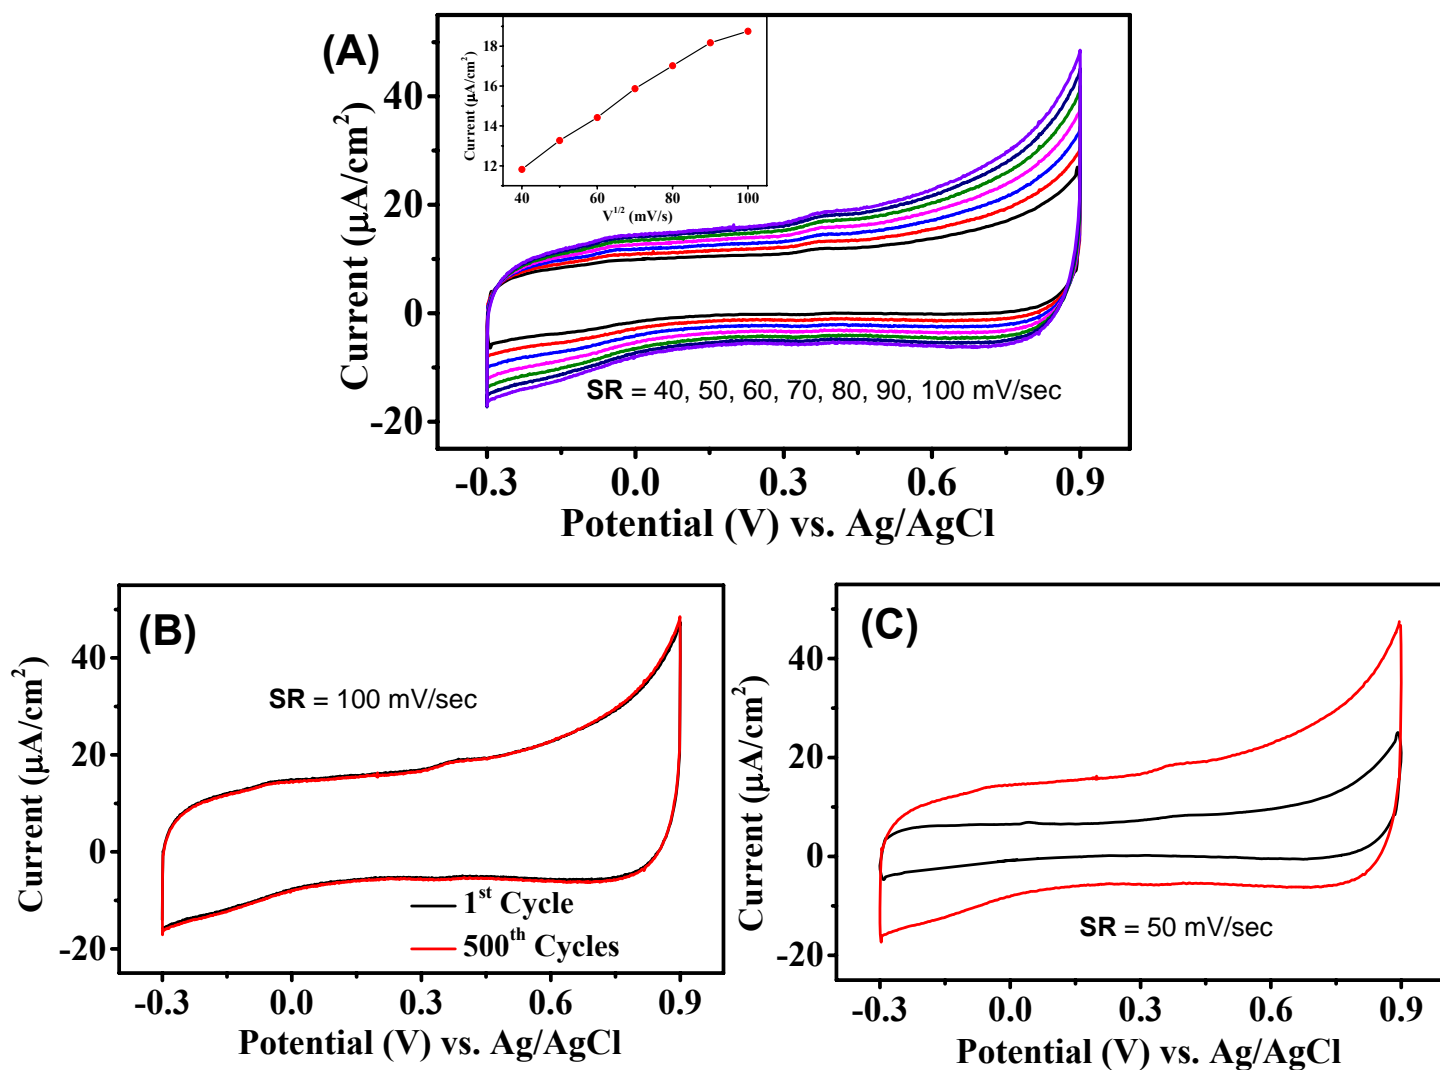

**Figure S74:** Cyclic voltammograms of peptide **6a** (Boc-Phe-Phe-*tz*-A<sup>N(Boc)<sub>2</sub></sup>-aeg-OEt) supported Toray Carbon electrode in 0.1M potassium phosphate buffer electrolytes at pH=7.4 and 0.1M KCl (A) at different scan rate from 40 mV/s to 100mV/s; **Inset:** Scan rate effect at different scan rate from 40 mV/s to 100mV/s; (B) at a scan rate of 50mV/s of 1<sup>st</sup> and 500<sup>th</sup> cycles; (C) at a scan rate of 50 mV/s compared to bare electrode.

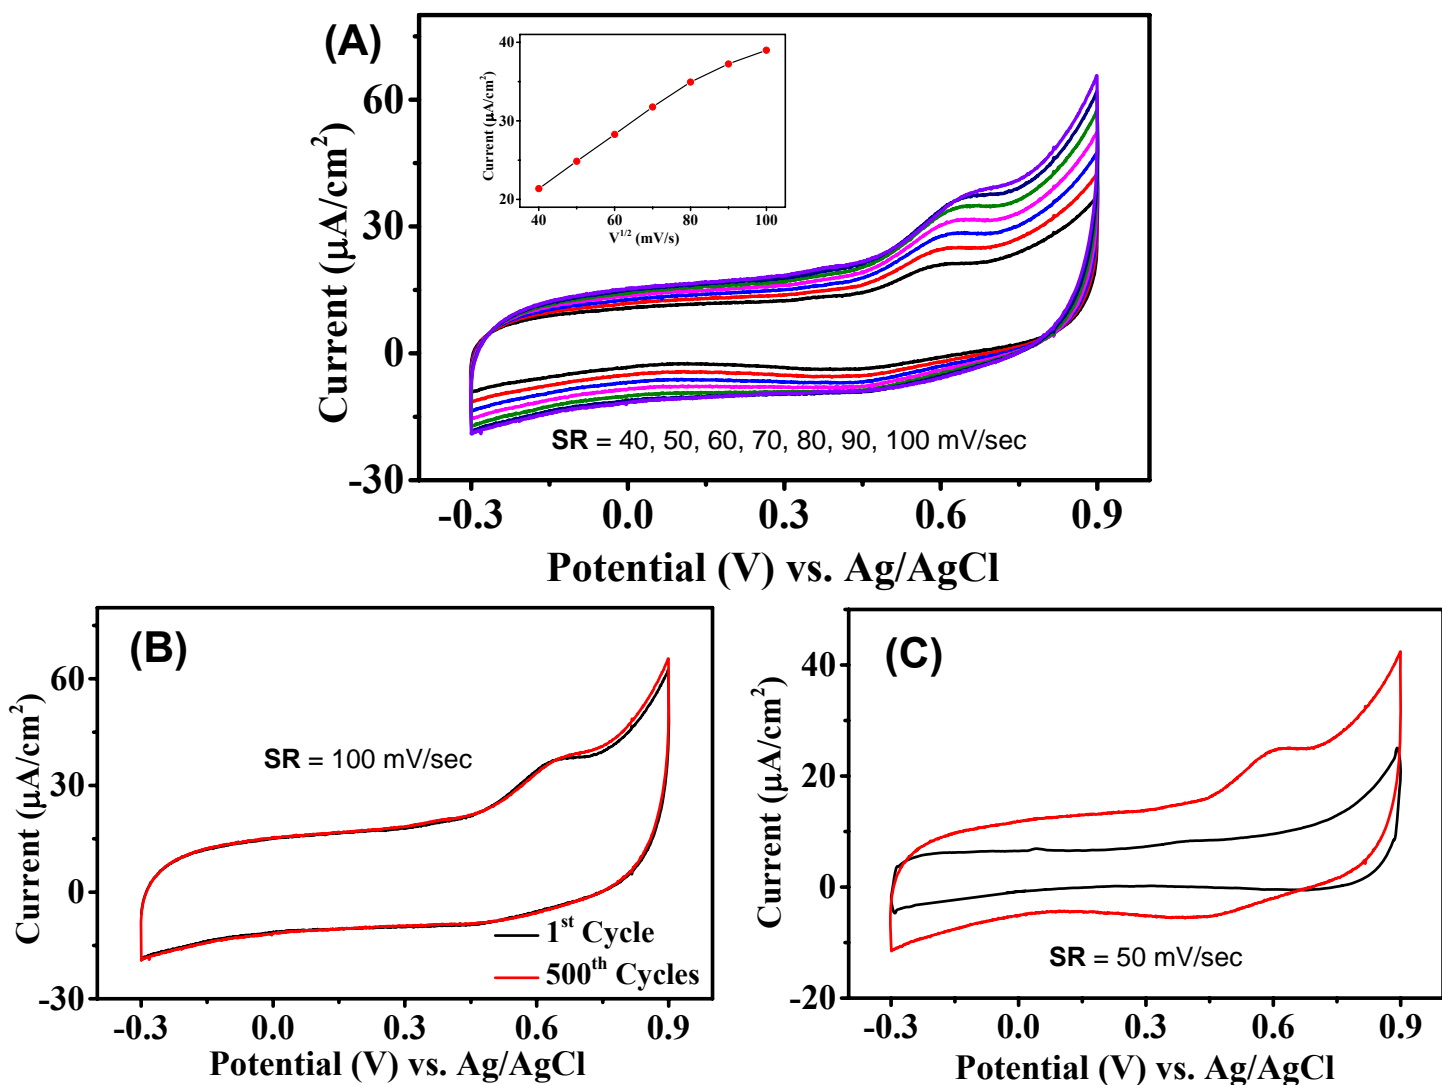

**Figure S75:** Cyclic voltammograms of peptide **6b** (Boc-Phe-Phe-*tz*-A<sup>NHCbz</sup>-aeg-OEt) supported Toray Carbon electrode in 0.1M potassium phosphate buffer electrolytes at pH=7.4 and 0.1M KCl (A) at different scan rate from 40 mV/s to 100mV/s; **Inset:** Scan rate effect at different scan rate from 40 mV/s to 100mV/s; (B) at a scan rate of 50mV/s of 1<sup>st</sup> and 500<sup>th</sup> cycles; (C) at a scan rate (SR) of 50 mV/s compared to bare electrode.

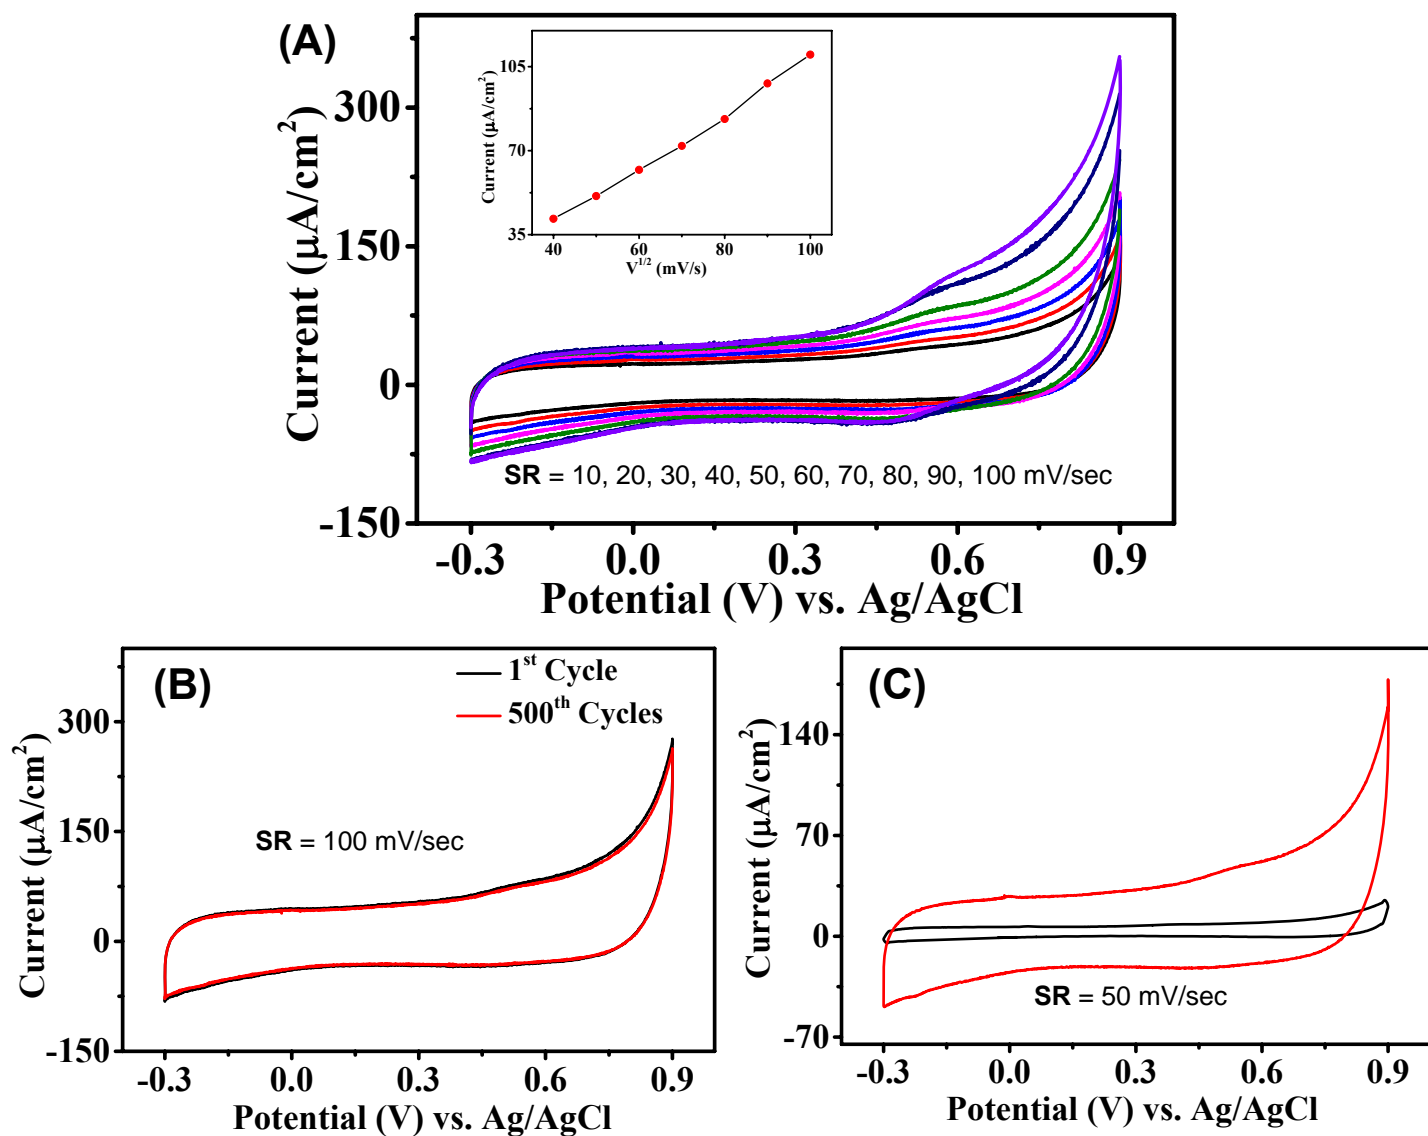

**Figure S76:** Cyclic voltammograms of peptide **6c** (Boc-Phe-Phe-*tz*-G<sup>NHiBu</sup>-aeg-OEt) supported Toray Carbon electrode in 0.1M potassium phosphate buffer electrolytes at pH=7.4 and 0.1M KCl (A) at different scan rate from 10 mV/s to 100mV/s; **Inset:** Scan rate effect at different scan rate from 10 mV/s to 100mV/s; (B) at a scan rate of 50mV/s of 1<sup>st</sup> and 500<sup>th</sup> cycles; (C) at a scan rate of 50 mV/s compared to bare electrode.

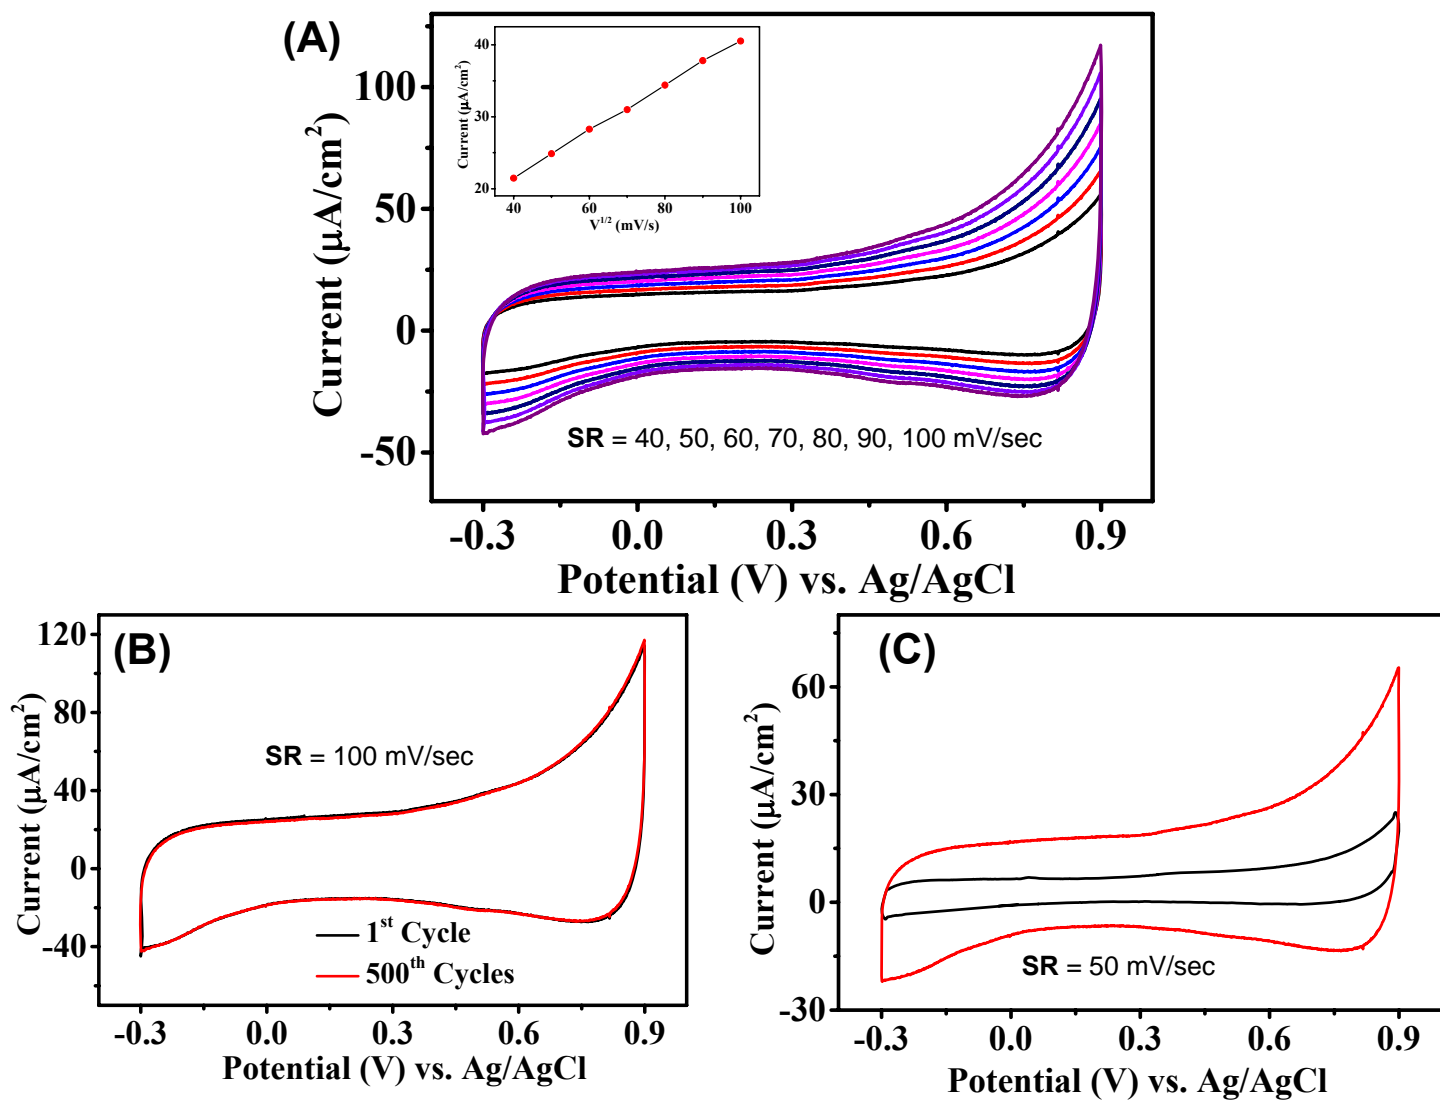

**Figure S77:** Cyclic voltammograms of peptide **6d** (Boc-Phe-Phe-*tz*-T-aeg-OEt) supported Toray Carbon electrode in 0.1M potassium phosphate buffer electrolytes at pH=7.4 and 0.1M KCl (A) at different scan rate from 40 mV/s to 100mV/s; **Inset:** Scan rate effect at different scan rate from 40 mV/s to 100mV/s; (B) at a scan rate of 50mV/s of 1<sup>st</sup> and 500<sup>th</sup> cycles; (C) at a scan rate of 50 mV/s compared to bare electrode.



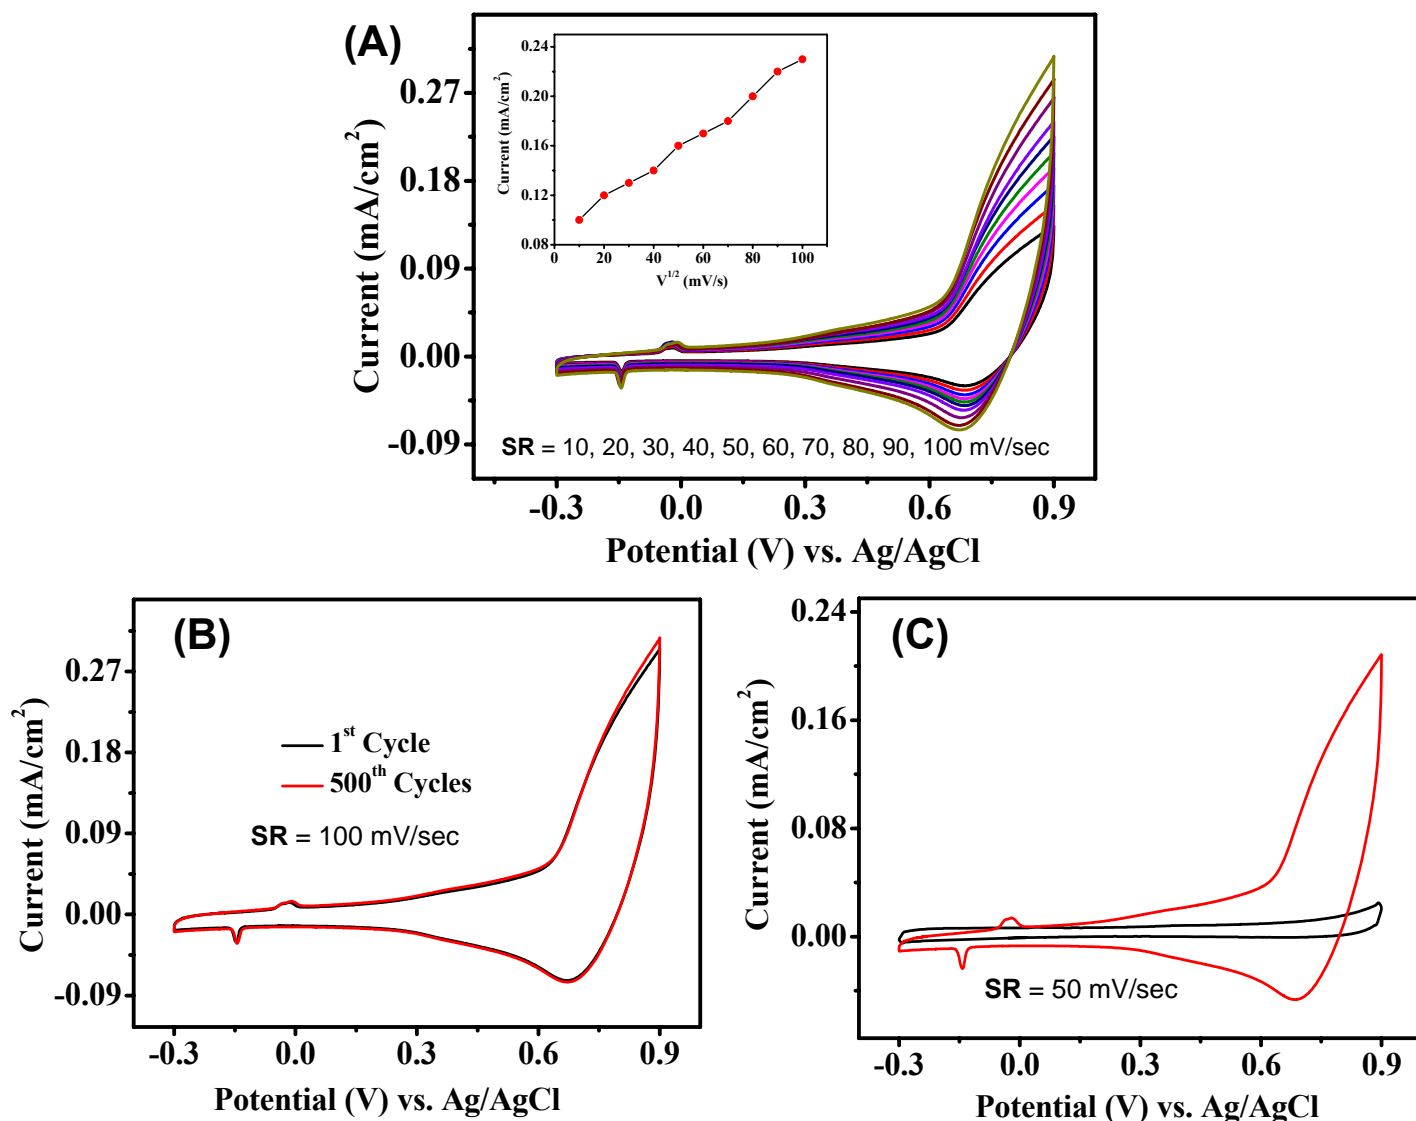

**Figure S78:** Cyclic voltammograms of peptide **9** (Boc-Phe-Phe-*tz*-aeg-OEt) supported Toray Carbon electrode in 0.1M potassium phosphate buffer electrolytes at pH=7.4 and 0.1M KCl (A) at different scan rate from 10 mV/s to 100mV/s; **Inset:** Scan rate effect at different scan rate from 10 mV/s to 100mV/s; (B) at a scan rate of 50mV/s of 1<sup>st</sup> and 500<sup>th</sup> cycles; (C) at a scan rate of 50 mV/s compared to bare electrode.

## **References:**

1. Meltzer, P. C.; Liang A. Y.; Matsudaira, P. Peptide Nucleic Acids: Synthesis of Thymine, Adenine, Guanine, and Cytosine Nucleobases. *J. Org. Chem.* **1995**, *60*, 4305-4308.
2. Efthymiou, T. C.; Desaulniers, J-P. Synthesis and properties of oligonucleotides that contain a triazole-linked nucleic acid dimer. *J. Heterocyclic Chem.* **2011**, *48*, 533-539.
3. Englund, E. A.; Xu, Q.; Witschi, M. A.; Appella, D. H. PNA-DNA Duplexes, Triplexes, and Quadruplexes Are Stabilized with trans-Cyclopentane Units. *J. Am. Chem. Soc.* **2006**, *128*, 16456-16457.
4. Datta, D.; Tiwari, O.; Ganesh, K. N. New archetypes in self-assembled Phe-Phe motif induced nanostructures from nucleoside conjugated-diphenylalanines. *Nanoscale* **2018**, *10*, 3212-3224.
5. Baral, A.; Roy, S.; Ghosh, S.; Hermida-Merino, D.; Hamley, I. W.; Banerjee, A. A Peptide-Based Mechanosensitive, Proteolytically Stable Hydrogel with Remarkable Antibacterial Properties. *Langmuir* **2016**, *32*, 1836-1845.
